# Translational control through differential ribosome pausing during amino acid limitation in mammalian cells

Alicia M. Darnell<sup>1</sup>, Arvind R. Subramaniam<sup>2\*</sup>, Erin K. O'Shea<sup>1,3\*#</sup>

<sup>1</sup> Department of Molecular and Cellular Biology, Harvard University, Cambridge, MA 02138, USA

<sup>2</sup> Basic Sciences Division and Computational Biology Program of Public Health Sciences Division, Fred Hutchinson Cancer Research Center, Seattle, WA 98109

<sup>3</sup> Howard Hughes Medical Institute, Harvard University Faculty of Arts and Sciences Center for Systems Biology, Harvard University, Cambridge, MA 02138, USA; Department of Chemistry and Chemical Biology, Harvard University, Cambridge, MA 02138, USA

\* corresponding authors: [راسي@fredhutch.org](mailto:راسي@fredhutch.org); [osheae@hhmi.org](mailto:osheae@hhmi.org)

# lead contact

## Summary

Limitation for amino acids is thought to regulate translation in mammalian cells primarily by signaling through the kinases mTORC1 and GCN2. We find that limitation for the amino acid arginine causes a selective loss of tRNA charging, which regulates translation through ribosome pausing at two of six arginine codons. Surprisingly, limitation for leucine, an essential and abundant amino acid in protein, results in little or no ribosome pausing. Chemical and genetic perturbation of mTORC1 and GCN2 signaling revealed that their robust response to leucine limitation prevents ribosome pausing, while an insufficient response to arginine limitation led to loss of arginine tRNA charging and ribosome pausing. Codon-specific ribosome pausing decreased protein production and triggered premature ribosome termination without significantly reducing mRNA levels. Together, our results suggest that amino acids which are not optimally sensed by the mTORC1 and GCN2 pathways still regulate translation through an evolutionarily conserved mechanism based on codon-specific ribosome pausing.

## 27 **Introduction**

28 Cells need to regulate anabolic processes to maintain homeostasis in the face of fluctuating  
29 nutrient levels. Of these processes, protein synthesis consumes the highest fraction of  
30 nutrients and energy stores in proliferating cells (Buttgereit and Brand, 1995; Hosios et al.,  
31 2016), and is therefore tightly controlled in response to fluctuations in the levels of its amino  
32 acid substrates. In eukaryotic cells, amino acid limitation is sensed by two evolutionarily  
33 conserved signaling pathways anchored around the kinases mechanistic Target Of  
34 Rapamycin in Complex 1 (mTORC1) (Saxton and Sabatini, 2017) and General Control  
35 Nonderepressible 2 (GCN2) (Berlanga et al., 1999; Hinnebusch and Natarajan, 2002). Amino  
36 acid limitation inhibits mTORC1 signaling (Hara et al., 1998) and activates GCN2 signaling  
37 (Sood et al., 2000), which reduces overall protein synthesis rate through a decrease in the  
38 rate of ribosome initiation on mRNA transcripts (Sonenberg and Hinnebusch, 2009). The  
39 failure of either pathway to respond to amino acid limitation can lead to cell death, particularly  
40 in nutrient-challenged contexts such as tumors (Nofal et al., 2017; Ye et al., 2010) or  
41 neonates (Efeyan et al., 2013; Zhang et al., 2002), underscoring the importance of their  
42 regulatory control over protein synthesis in maintaining cellular homeostasis.

43 The mTORC1 and GCN2 pathways both respond strongly to simultaneous limitation for all 20  
44 amino acids (Kimball, 2002), yet their responses to fluctuations in the levels of individual  
45 amino acids are markedly different. mTORC1 signaling is highly sensitive to fluctuations in  
46 leucine levels, and to a lesser extent, to arginine and glutamine levels (Hara et al., 1998). By  
47 contrast, GCN2 kinase, which senses amino acid limitation by binding uncharged tRNAs, has  
48 a similar affinity for different tRNAs (Dong et al., 2000; Zaborske et al., 2010), but variation in  
49 its response to limitation for individual amino acids is nonetheless detected in activation of the  
50 downstream transcriptional program (Jousse et al., 2000; Tang et al., 2015). How these

51 variegated mTORC1 and GCN2 responses are integrated, and whether they are sufficient, to  
52 regulate protein synthesis rate during individual amino acid limitation is poorly understood.  
53 This is of increasing importance as there is growing evidence that many cancers exhibit  
54 dependence on single amino acids for growth or metastasis (Hattori et al., 2017; Jain et al.,  
55 2012; Knott et al., 2018; Krall et al., 2016; Loayza-Puch et al., 2016a; Possemato et al., 2011;  
56 Scott et al., 2000; Wise and Thompson, 2010).

57 In addition to mTORC1- and GCN2-mediated regulation of translation initiation, amino acid  
58 limitation can affect protein synthesis by reducing the elongation rate of ribosomes. In  
59 bacteria, limitation for single auxotrophic amino acids causes selective loss of tRNA  
60 isoacceptor charging and thus ribosome pausing at a subset of synonymous codons cognate  
61 to the limiting amino acid (Dittmar et al., 2005; Subramaniam et al., 2013a). This ribosome  
62 pausing results in abortive termination and a consequent decrease in protein expression  
63 (Ferrin and Subramaniam, 2017; Subramaniam et al., 2013b, 2014). Notably, the codons at  
64 which ribosomes pause during amino acid limitation are not necessarily rare codons or  
65 decoded by low abundance tRNA isoacceptors (Subramaniam et al., 2013b, 2013a, 2014).  
66 Ribosomes pause during histidine limitation in yeast, but whether this pausing is codon-  
67 specific, and its impact on protein expression, are not known (Guydosh and Green, 2014).  
68 Ribosome pausing has also been observed in pathological mammalian states, including in a  
69 mouse model of neurodegeneration (Ishimura et al., 2014), and in patient-derived cancer  
70 tissues (Loayza-Puch et al., 2016a). However, the factors that drive ribosome pausing in  
71 these cancer cells are unclear and difficult to parse *in vitro*. Further, the codon-specificity and  
72 effect of ribosome pausing on protein expression have not been studied in mammalian  
73 systems, though codon usage frequency and tRNA levels have been implicated in the  
74 regulation of ribosome elongation rate and protein production during metastasis,

75 differentiation, and amino acid limitation (Gingold et al., 2014; Goodarzi et al., 2016; Saikia et  
76 al., 2016). However, ribosome profiling studies have failed to find evidence for a simple  
77 relationship between codon usage, tRNA levels and ribosome density in mammalian cells  
78 (Ingolia et al., 2011; Qian et al., 2012).

79 Here, we investigated how amino acid signaling pathways and codon usage interact to  
80 regulate protein synthesis in response to limitation for single amino acids across multiple  
81 human cell lines. We focused on limitation for two amino acids, leucine and arginine, which  
82 can both regulate protein synthesis by acting as direct signals to the mTORC1 complex  
83 (Chantranupong et al., 2016; Wolfson et al., 2016). Upon arginine limitation, we found that a  
84 stereotypical pattern of ribosome pausing emerges at the same two out of six synonymous  
85 arginine codons across cell lines, suggesting that arginine becomes a rate-limiting substrate  
86 in protein synthesis. Intriguingly, there was little to no ribosome slow-down at any of the six  
87 leucine codons upon limitation for leucine, even though it is an essential amino acid. The  
88 hierarchy of ribosome pausing at synonymous arginine codons was not correlated with codon  
89 usage or genomic tRNA copy number, but followed the selective loss of arginine isoacceptor  
90 tRNA charging. By perturbing amino acid signaling, we established that tRNA charging loss  
91 and ribosome pausing are driven by an inadequate response to amino acid limitation through  
92 the mTORC1 and GCN2 pathways. We found that codon-specific ribosome pausing  
93 decreases both the rate of global protein synthesis as well as protein expression from  
94 individual mRNAs. Further, severe pausing caused by loss of the mTORC1 and GCN2  
95 signaling responses to amino acid limitation triggers the premature termination of protein  
96 synthesis.

97 Our study provides a mechanistic dissection of the cause and consequences of ribosome  
98 pausing due to amino acid limitation in mammalian cells. We reveal an evolutionarily

99 conserved role for synonymous codon-specific ribosome pausing in the regulation of protein  
100 synthesis during amino acid limitation, a phenomenon which has been previously observed  
101 only in bacteria (Subramaniam et al., 2013b, 2014). However, we discovered a layer of  
102 complexity in this process that is unique to mammalian cells – quantitative differences in the  
103 activity of amino acid signaling pathways result in qualitative differences in ribosome pausing  
104 upon limitation for the two amino acids arginine and leucine. By establishing a molecular  
105 framework relating amino acid depletion, tRNA charging, ribosome elongation, and protein  
106 expression, our work provides a rational starting point from which to dissect the cellular  
107 phenotype of disease states, such as cancers, that experience nutrient limitation and exhibit  
108 dysregulated ribosome dynamics (Ishimura et al., 2014; Loayza-Puch et al., 2016b).

## 109 **Results**

### 110 **1.1. Ribosomes pause at specific synonymous codons upon limitation for** 111 **arginine but not leucine**

112 To systematically explore the effect of individual amino acid depletion on translation in  
113 mammalian cells, we performed ribosome profiling (Ingolia et al., 2009, 2012) in three human  
114 cell lines – HEK293T, HeLa and HCT116 – during limitation for either leucine or arginine.  
115 Although ribonuclease I (RNaseI) is typically used to generate monosome-bound RNA  
116 footprints for ribosome profiling (Ingolia et al., 2012), we found that micrococcal nuclease  
117 (MNase) treatment better preserved monosome integrity (Supp. Fig. 1A-C, Methods), and  
118 sequencing the resulting footprints (Supp. Fig. 1D) produced ribosome profiling libraries with  
119 reads enriched in coding regions and displaying three nucleotide periodicity, despite a  
120 broader read length distribution, as previously reported (Dunn et al., 2013; Reid et al., 2015)  
121 (Supp. Fig. 1E-G). After sequencing, we quantified the net increase in normalized average  
122 ribosome footprint density in the window around each of the 61 sense codons as a measure  
123 of the change in elongation kinetics of ribosomes upon amino acid limitation (Fig. 1A; Supp.  
124 Fig. 1H, Methods).

125 Upon arginine limitation for three hours, two of the six arginine codons—CGC and CGU—had a  
126 substantial increase in ribosome density across all three cell lines (Fig. 1A,C; Supp. Fig. 1H).  
127 Ribosome pausing at these codons increased with prolonged amino acid limitation for six  
128 hours (Fig. 1B). None of the codons encoding the other 19 amino acids had increased  
129 ribosome density upon arginine limitation (Fig. 1A, Supp. Fig. 1H). Notably, we also observed  
130 smaller peaks in ribosome density approximately one ribosome footprint length (~ 30  
131 nucleotides) behind the major peaks at CGC and CGU codons (Fig. 1B,C; asterisks). Similar  
132 satellite peaks, presumably caused by collision of the trailing ribosome with the paused

133 ribosome, have been previously observed during limitation for single amino acids in *E. coli*  
134 (Subramaniam et al., 2014) and in *S. cerevisiae* (Guydosh and Green, 2014).

135 In contrast, none of the six leucine codons displayed a consistent increase in ribosome  
136 density across all three cell lines in response to leucine limitation (Fig. 1A-C; Supp. Fig. 1H).  
137 Since leucine cannot be synthesized in these cells, we were surprised to find that ribosome  
138 elongation at leucine codons is largely unperturbed by leucine limitation. We considered the  
139 possibility that cells do not experience major changes in intracellular leucine levels upon its  
140 external limitation. However, direct measurement of cellular amino acid levels indicated that  
141 arginine and leucine levels fell close to the detection limit when they were each removed from  
142 the growth medium, suggesting that cells are effectively starved for both leucine and arginine  
143 in these conditions (Supp. Fig. 1I).

144 We then tested whether the selective increase in ribosome density upon arginine limitation  
145 correlated with simple measures of codon optimality or tRNA abundance, as hypothesized  
146 previously (Gingold et al., 2014; Kirchner and Ignatova, 2015; Saikia et al., 2016). The  
147 pausing hierarchy did not correlate significantly in any cell line with either transcriptomic  
148 codon usage (Fig. 1D, Supp. Fig. 1J,L) or genomic copy number of the cognate tRNA (Fig.  
149 1E, Supp. Fig. 1K,M,N) (Kanaya et al., 1999) (Spearman's rank correlation p-values  
150 displayed on plots). Nevertheless, the consistent hierarchy of codon-specific ribosome  
151 pausing upon arginine limitation, and its absence during leucine limitation, suggests a  
152 common principle underlying the emergence of ribosome pausing.

## 153 **1.2. Cognate tRNA charging loss upon amino acid limitation sets the hierarchy of** 154 **ribosome pausing at synonymous codons**

155 As ribosome elongation rate at a codon depends on recruitment of the cognate charged  
156 tRNA, we expected that the arginine tRNA which decodes the two pause-inducing codons

157 CGC and CGU, with the anticodon ACG (tRNA<sup>Arg</sup><sub>ACG</sub>), would exhibit a greater charging loss  
158 upon arginine limitation than the isoacceptor arginine tRNAs that decode the remaining four  
159 arginine codons. In line with this expectation, tRNA<sup>Arg</sup><sub>ACG</sub> lost 70% of its charging upon  
160 arginine limitation in HEK293T cells (Fig. 2A, Supp. Fig. 2A). By contrast, tRNA<sup>Arg</sup><sub>CCG</sub> and  
161 tRNA<sup>Arg</sup><sub>UCG</sub>, which decode the arginine codons CGG and CGA at which we did not observe  
162 strong pausing, lost less than 45% of their charging (Fig. 2A, Supp. Fig. 2A). All leucine  
163 tRNAs tested lost less than 40% of their charging upon leucine limitation, consistent with the  
164 observation that there is no ribosome pausing at leucine codons (Fig. 2B, Supp. Fig. 2B). As  
165 expected, arginine and leucine tRNAs were between 75% to 90% charged during growth in  
166 rich conditions, and upon limitation for a non-cognate amino acid (Fig. 2A,B). Charging loss  
167 was also more severe for tRNA<sup>Arg</sup><sub>ACG</sub> than a leucine tRNA in the HCT116 cell line (Supp. Fig.  
168 2C). Overall we found a positive correlation between the change in ribosome density at a  
169 codon and the loss in charging of its cognate tRNA upon limitation for an amino acid  
170 (Spearman's rank correlation coefficient  $\rho = 0.7$ ,  $p = 0.015$ ; Fig. 2C). Our results suggest that  
171 ribosomes begin to pause at a codon only when a majority of the cognate charged tRNA is  
172 depleted.

### 173 **1.3. The mTORC1 and GCN2 pathways respond divergently to arginine limitation**

174 We next examined whether the loss of charged tRNA and emergence of ribosome pausing  
175 during arginine but not during leucine limitation might be related to the amino acid signaling  
176 response through the GCN2 and mTORC1 pathways, given that these pathways are  
177 presumed to sense amino acid levels and co-ordinately regulate protein synthesis in order to  
178 maintain intracellular amino acid homeostasis (Bröer and Bröer, 2017). Consistent with  
179 previous reports (Hara et al., 1998), we observed greater mTORC1 inhibition during limitation  
180 for leucine in comparison to arginine – levels of the mTORC1 target phosphorylated S6



181 kinase 1 (P~S6K) fell by 75% during leucine limitation, but only 45% during arginine limitation  
182 in HEK293T cells (Fig. 3A). Levels of the S6K target phosphorylated ribosomal protein S6  
183 (P~RPS6) correspondingly reflected this differential mTORC1 response (Supp. Fig. 3A,B).  
184 GCN2 signaling was strongly activated during limitation for both amino acids in these cells –  
185 levels of the GCN2 target phosphorylated eIF2 $\alpha$  (P~eIF2 $\alpha$ ) increased to a similar extent (Fig.  
186 3B).

187 Kinase activity in HEK293T cells mirrored downstream changes in ribosome density on  
188 mRNA targets of the mTORC1 pathway. 46 of 63 mRNAs that are translationally repressed  
189 by mTORC1 inhibition (Hsieh et al., 2012; Thoreen et al., 2012) had lower ribosome density  
190 during limitation for leucine than arginine (Fig. 3C,E; Supp. Fig. 3C,E,G; Wilcoxon signed rank  
191 test  $p = 1.2e-05$ ). Similarly, mTORC1 signaling was more repressed during limitation for  
192 leucine in HeLa cells (Fig. 3C,E; Supp. Fig. 3G; Wilcoxon signed rank test  $p = 0.0003$ ). This  
193 pattern was reversed in HCT116 cells, in which there was little mTORC1 or GCN2 signaling  
194 response to leucine limitation (Fig. 3C-F; Supp. Fig. 3G), consistent with our observation that  
195 leucine tRNA charging is largely unaffected by leucine limitation (Supp. Fig. 2C).

196 Comparing downstream changes in ribosome density on mRNA targets of ATF4 and CHOP,  
197 transcriptional effectors downstream of GCN2 (Han et al., 2013), during arginine versus  
198 leucine limitation revealed subtle but consistent differential activation of GCN2. In HEK293T  
199 cells, GCN2 signaling was similarly activated during limitation for leucine and arginine; 26 out  
200 of 40 of mRNA targets of ATF4 and CHOP, were more upregulated upon limitation for  
201 arginine than leucine (Fig. 3D,F; Supp. Fig. 3D,F,G; Wilcoxon signed rank test  $p = 0.33$ ).  
202 However, GCN2 became significantly more activated during arginine limitation after a longer  
203 duration of amino acid limitation (Supp. Fig. 3D,F; Wilcoxon signed rank test  $p = 5.7e-4$ ),

204 which also increased ribosome pausing (Fig. 1A,B). In addition, GCN2 was more activated  
205 during limitation for arginine in the HCT116 and HeLa cell lines (Wilcoxon signed rank test  $p =$   
206  $9.3e-07$  and  $1.8e-12$ , respectively) (Fig. 3D,F; Supp. Fig. 3G). GCN2 was generally most  
207 responsive in the conditions and cell lines in which ribosome pausing was most severe,  
208 consistent with the recent observation that GCN2 may be activated downstream of ribosome  
209 pausing (Ishimura et al., 2016).

210 Overall, the variability of the signaling responses across all three cell lines was surprising,  
211 given that we observed a conserved signature of ribosome pausing. However, if pausing is  
212 determined by the extent to which the amino acid supply and demand are matched under  
213 each condition, it may be the totality of the signaling response, rather than the activity of each  
214 single pathway, that regulates this balance. We sought to test this idea in the HEK293T cell  
215 line, in which ribosome pausing emerges only during arginine limitation, in the context of a  
216 relatively weaker overall signaling response than leucine limitation.

#### 217 **1.4. An insufficient mTORC1 and GCN2 response to amino acid limitation induces** 218 **ribosome pausing**

219 The mTORC1 and GCN2 pathways inhibit the initiation phase of protein synthesis in  
220 response to amino acid limitation (Ma and Blenis, 2009; Sonenberg and Hinnebusch, 2009).  
221 Reducing initiation rate should also lower the number of elongating ribosomes – a major  
222 source of demand for the cytosolic amino acid pool – thereby determining the consumption  
223 rate of a limiting amino acid. If the strength of their combined signaling response is too weak  
224 to sufficiently reduce arginine consumption during its limitation, tRNA charging loss and  
225 ribosome pausing could result. Specifically, if residual mTORC1 activity and/or inadequate  
226 activation of GCN2 drives amino acid consumption and thus loss of tRNA charging and  
227 ribosome pausing, we hypothesized that increasing the response of these pathways would

228 reduce pausing upon arginine limitation, and conversely, that decreasing their response  
229 would induce pausing upon leucine limitation. To test this hypothesis, we employed chemical  
230 and genetic methods to perturb the mTORC1 and GCN2 responses to arginine and leucine  
231 limitation in HEK293T cells, and determined the resulting changes to tRNA charging and  
232 ribosome pausing.

233 We first inhibited mTORC1 kinase activity using the catalytic site inhibitor Torin1 (Liu et al.,  
234 2010; Thoreen et al., 2009) (Fig. 4A) during both arginine and leucine limitation, and found  
235 that charging of all arginine and leucine tRNAs tested increased back to baseline rich  
236 conditions levels (Supp. Fig. 4A). Torin1 treatment also prevented an increase in ribosome  
237 density at any codon upon arginine or leucine limitation (Fig. 4B, Supp. Fig. 4B),  
238 demonstrating that mTORC1 inhibition during amino acid limitation is sufficient to block  
239 depletion of the cognate charged tRNA fraction and ribosome pausing.

240 Next, we tested whether loss of the mTORC1 response to amino acid limitation would  
241 exacerbate tRNA charging loss and ribosome pausing. Towards this, we rendered mTORC1  
242 kinase insensitive to amino acid levels by stable overexpression of a constitutively active form  
243 of its upstream regulator, RagB GTPase (RagB-Q99L) (Sancak et al., 2008) (Fig. 4C). The  
244 RagB-Q99L cell line exhibited reduced leucine tRNA charging during leucine limitation;  
245 charging fell to 22% for tRNA<sup>Leu</sup><sub>CAA</sub>, which decodes the codon UUG (Supp. Fig. 4C). By  
246 comparing charging for this tRNA during leucine limitation in the RagB-Q99L cell line to a  
247 control line that over-expressed humanized *R. reniformis* fluorescent protein (hrGFP), we  
248 concluded that constitutive mTORC1 activity increased charging loss due to leucine limitation  
249 by 50%. Charging was also reduced 36% due to constitutive mTORC1 activity for tRNA<sup>Leu</sup><sub>AAG</sub>,  
250 which decodes CUU (Supp. Fig. 4C). Concordantly, minor ribosome pausing was detected at  
251 the leucine codons UUG and CUU (Supp. Fig. 4D). However, little difference was detected in

252 arginine tRNA charging or ribosome pausing at arginine codons upon arginine limitation  
253 (Supp. Fig. 4C,D), and we thus repeated these measurements after 6 hours, rather than 3  
254 hours, of amino acid limitation to reveal any effects on translation that might become more  
255 pronounced over time.

256 After 6 hours of limitation for leucine, the RagB-Q99L cell line exhibited further reduced  
257 charging of leucine tRNAs compared to control cell lines; charging fell as low as 18% for  
258 tRNA<sup>Leu</sup><sub>CAA</sub> (Supp. Fig. 4E) and ribosome pausing emerged at the cognate leucine codon  
259 UUG as well as the CUC and CUU codons (Fig. 4F; Supp. Fig. 4F). Similarly, during arginine  
260 limitation, the proportion of charged tRNA<sup>Arg</sup><sub>ACG</sub> fell to 19% (Supp. Fig. 4E) and ribosome  
261 pausing increased at the cognate arginine codons CGC and CGU (Fig. 4F; Supp. Fig. 4F).  
262 Ribosome pausing was also increased slightly in the hrGFP control cell line (Fig. 4F, Supp.  
263 Fig. 4F), possibly due to the translational burden of transgene overexpression (Elf et al.,  
264 2003). In summary, constitutive mTORC1 activation in the RagB-Q99L cell line significantly  
265 worsened tRNA charging loss and exacerbated ribosome pausing during both leucine and  
266 arginine limitation.

267 We next investigated the role of GCN2 in ribosome pausing. We constructed a GCN2  
268 knockout (GCN2 KO) cell line by CRISPR/Cas9 targeting (Cong et al., 2013) (Supp. Fig. 4G)  
269 in which the GCN2 kinase target eIF2 $\alpha$  was not phosphorylated in response to amino acid  
270 limitation (Fig. 4D). GCN2 activation is necessary for inhibition of mTORC1 signaling upon  
271 leucine or arginine limitation in mouse as well as in murine and human cancer cell lines  
272 (Averous et al., 2016; Xiao et al., 2011), and we confirmed that there is no significant  
273 mTORC1 response to those conditions in our GCN2 KO cell line (Fig. 4E).

274 tRNA charging loss and ribosome pausing were greatly amplified in the GCN2 KO cell line;  
275 tRNA<sup>Leu</sup><sub>CAA</sub> charging fell to only 14% upon leucine limitation (Supp. Fig. 4E) and ribosome  
276 density at the UUG leucine codon rose substantially, with a genome-wide average of 4  
277 ribosomes stacked behind the paused ribosome (Fig. 4F, Supp. Fig. 4F). Pausing increased  
278 only slightly at the arginine CGC and CGU codons (Fig. 4F, Supp. Fig. 4F), although  
279 tRNA<sup>Arg</sup><sub>ACG</sub> charging continued to drop (Supp. Fig. 4E), indicating that pause duration is  
280 approaching an upper limit at these codons. Indeed, significant ribosome pausing emerged at  
281 the AGA arginine codon (Fig. 4F, top panel; Supp. Fig. 4F), suggesting that charging of a  
282 second arginine isoacceptor, tRNA<sup>Arg</sup><sub>UCU</sub>, is exhausted upon arginine limitation in the GCN2  
283 KO cell line. Together these results indicate that the absence of a response through the  
284 GCN2 or mTORC1 pathways during amino acid limitation is sufficient to deplete charged  
285 tRNA pools and induce extensive genome-wide ribosome pausing at cognate codons,  
286 consistent with our hypothesis that an insufficient signaling response to amino acid limitation  
287 can drive consumption of the limiting amino acid into a substrate-limiting regime for protein  
288 synthesis.

289 In addition to their control over translation, mTORC1 and GCN2 regulate other critical  
290 functions such as metabolism, autophagy, and cell division (Castilho et al., 2014; Laplante  
291 and Sabatini, 2013). In principle, regulation of these processes could affect intracellular amino  
292 acid levels. Hence, it is possible that mTORC1 and GCN2 determine whether ribosome  
293 pausing arises during amino acid limitation by controlling these processes in addition to, or  
294 instead of, by reducing translation. To test our hypothesis that arginine and leucine levels  
295 during their respective limitation are primarily determined by the demand from translation  
296 elongation, we briefly treated cells limited for arginine or leucine with the translation  
297 elongation inhibitor cycloheximide. This was sufficient to significantly restore tRNA<sup>Leu</sup><sub>CAA</sub> and

298 tRNA<sup>Arg</sup><sub>ACG</sub> charging (Supp. Fig. 4H), indicating that the flux of arginine and leucine into  
299 translation is a key determinant of the cytosolic levels of these amino acids upon their  
300 limitation. Thus, the ribosome pausing outcome is likely determined by the translational  
301 control imposed downstream of mTORC1 and GCN2 during limitation for an amino acid.

### 302 **1.5. Genome-wide ribosome pausing reduces global protein synthesis rate during** 303 **arginine limitation**

304 Having examined the upstream determinants of ribosome pausing during limitation for  
305 arginine and leucine, we sought to investigate its downstream consequences. Towards this  
306 goal, we considered the impact of ribosome pausing on cellular translation. We measured  
307 global protein synthesis rate during limitation for leucine or arginine by quantifying  
308 incorporation of the antibiotic puromycin into nascent polypeptides (Schmidt et al., 2009), and  
309 found that global protein synthesis rate was consistently lower during limitation for arginine  
310 than leucine (Fig. 5A,B; Supp. Fig. 5A,B). This differential reduction is consistent with similar  
311 measurements made previously following extended amino acid limitation (Scott et al., 2000).  
312 Based on our previous experiments, we reasoned that three processes could contribute to the  
313 regulation of translation during arginine limitation in HEK293T cells: mTORC1 inhibition,  
314 GCN2 activation, or ribosome pausing. Given that mTORC1 activity, which stimulates  
315 translation initiation, is higher during arginine limitation than leucine limitation (Fig. 3A,C,E;  
316 Supp. Fig. 3C,E), mTORC1 signaling cannot account for lower global protein synthesis during  
317 arginine relative to leucine limitation.

318 The principal difference between GCN2- and ribosome pausing-mediated control over  
319 translation is that GCN2 regulates initiation, while ribosome pausing regulates elongation. To  
320 assess whether initiation or elongation rate control accounts for the greater reduction of  
321 global protein synthesis rate upon arginine limitation versus leucine limitation, we used

322 polysome profiling to determine the average number of ribosomes per transcript in each  
323 condition. If global protein synthesis rate is lower during arginine limitation due to inhibition of  
324 translation initiation, there would be fewer ribosomes per transcript upon limitation for arginine  
325 compared to leucine. Instead, if global protein synthesis rate is reduced by slow elongation,  
326 we would find relatively more ribosomes per transcript upon arginine limitation. While the  
327 polysome fraction was reduced by limitation for either leucine or arginine, it was higher during  
328 arginine than leucine limitation in HEK293T cells (Fig. 5C, Supp. Fig. 5C), indicating that  
329 there are more ribosomes per transcript during arginine versus leucine limitation despite a  
330 lower global protein synthesis rate. Thus, elongation rate control, and not initiation rate  
331 control, is more likely to account for the greater repression of global protein synthesis rate  
332 upon arginine limitation.

333 mTORC1 inhibition during amino acid limitation reduces global elongation factor activity by  
334 phosphorylation of eukaryotic elongation factor 2 kinase (EEF2K) (Leprivier et al., 2013). In  
335 theory, this general inhibition of elongation, rather than codon-specific ribosome pausing,  
336 could account for a lower, elongation-limited global protein synthesis rate upon limitation for  
337 arginine relative to leucine. To assess the role of EEF2K in our measurements of global  
338 protein synthesis rate in each condition, we generated an EEF2K knockout cell line (Supp.  
339 Fig. 5D,E). Loss of general elongation factor regulation by EEF2K increased global protein  
340 synthesis rate upon arginine and leucine limitation by a similar, small margin (Supp. Fig. 5F).  
341 Therefore, downregulation of general elongation factor activity cannot account for the greater  
342 reduction of protein synthesis upon arginine than leucine limitation, and we instead attribute  
343 this difference to elongation rate control by ribosome pausing.

344 To isolate and quantify the contribution of ribosome pausing to global protein synthesis rate  
345 reduction, we made use of the GCN2 KO cell line, which lacks the initiation rate control

346 response to amino acid limitation through both the GCN2 and mTORC1 pathways (Averous  
347 et al., 2016; Harding et al., 2000). We reasoned that any residual inhibition of global protein  
348 synthesis rate during arginine or leucine limitation in the GCN2 KO cell line would be due to  
349 ribosome pausing. Global protein synthesis rate was reduced by 25% during arginine  
350 limitation (Fig. 5D, Supp. Fig. 5G). Strikingly, despite this lower global protein synthesis rate,  
351 there was a higher polysome fraction during arginine limitation than in rich conditions in this  
352 cell line, (Fig. 5E, Supp. Fig. 5C), consistent with our observation of strong ribosome pausing  
353 under these conditions (Fig. 4F). Ribosome pausing also develops at a leucine codon in the  
354 GCN2 KO cell line (Fig. 4F), and accordingly the polysome fraction was higher upon limitation  
355 for leucine than in rich conditions as well (Fig. 5E). However, there was no change to global  
356 protein synthesis rate upon limitation for leucine in the GCN2 KO cell line (Fig.  
357 5D), suggesting that global protein synthesis rate reduction in this condition in wild-type cells  
358 is primarily mediated by the mTORC1 and/or GCN2 responses. In conclusion, the inverse  
359 relationship between global protein synthesis rate and ribosome loading per transcript upon  
360 arginine limitation supports a model in which ribosome pausing limits global protein synthesis  
361 rate.

## 362 **1.6. Pause-inducing codons in mRNAs reduce protein expression and induce** 363 **premature termination of translation**

364 Given that ribosome pausing globally reduces protein synthesis, we next investigated whether  
365 pausing on mRNAs specifically inhibits production of the encoded protein. Towards this goal,  
366 we adapted a protein synthesis reporter in which YFP is fused to an engineered unstable *E.*  
367 *coli* dihydrofolate reductase (DHFR) domain (Han et al., 2014; Iwamoto et al., 2010). In this  
368 reporter system, the unstable reporter is rapidly degraded and fluorescence signal only  
369 accumulates upon addition of a stabilizing ligand, trimethoprim (TMP). Fluorescence signal



370 upon arginine and leucine limitation correlated well with the global protein synthesis rates we  
371 measured in those conditions (Supp. Fig. 6A, left plot, versus Fig. 5B), suggesting that it  
372 faithfully reflects the protein synthesis rate of the reporter. To determine the specific effect of  
373 ribosome pausing on reporter protein synthesis rate, we constructed a set of codon variant  
374 reporters in which either all arginine codons or all leucine codons were swapped to each of  
375 the six arginine or leucine codons, respectively (Fig. 6A).

376 We first determined whether the pause-inducing arginine codons, CGC and CGU (Fig. 1A-C),  
377 would reduce reporter protein synthesis rate during arginine limitation. In wild-type HEK293T  
378 cells, YFP-DHFR synthesis rate during arginine limitation was reduced to ~ 60% relative to its  
379 value during rich growth when the pause-inducing codons CGC or CGU were used to encode  
380 arginine (Fig. 6B, left plot; Supp. Fig. 6B). The CGC codon reduced YFP production  
381 specifically during arginine limitation in all three cell lines in which we found ribosome pausing  
382 at that codon (Fig. 1A-C), as well as in an alternative reporter construct with different 5' and 3'  
383 UTR elements (Supp. Fig. 6C). YFP synthesis rate was also reduced by use of the AGA  
384 codon (Fig. 6B, left plot; Supp. Fig. 6B), suggesting that pausing might emerge at this codon  
385 after the extended duration of arginine limitation that was necessary for detectable  
386 accumulation of reporter fluorescence. In the GCN2 KO cell line, in which ribosomes pause at  
387 CGC, CGU, and AGA codons (Fig. 4F), use of each of these codons also reduced YFP  
388 synthesis rate upon arginine limitation (Figure 6C, left plot). Importantly, there was little  
389 difference in the measured protein synthesis rates between the arginine codon variants upon  
390 leucine limitation, consistent with the absence of ribosome pausing at arginine codons during  
391 leucine limitation (Figure 6B,C; right plots; Supp. Fig. 6B). Similarly, the six leucine codon  
392 variants had comparable reductions in YFP synthesis rate upon leucine limitation or arginine  
393 limitation (Fig. 6D; Supp. Fig. 6B), consistent with the absence of ribosome pausing at these

394 codons in wild-type cells (Fig. 1A-C). However, YFP synthesis rate was strongly reduced for  
395 the UUG codon variant in the GCN2 KO cell line upon limitation for leucine, reflecting the  
396 emergence of ribosome pausing at this codon in this condition (Fig. 6E, right plot; Fig. 4F). In  
397 all cases, ribosome pausing upon amino acid limitation was sufficient to inhibit reporter  
398 protein synthesis.

399 Recent work suggests a role for mRNA degradation in the reduction of protein synthesis rates  
400 downstream of slow translation of rare codons in yeast (Presnyak et al., 2015; Radhakrishnan  
401 et al., 2016). To determine whether lower reporter protein production rates could be explained  
402 by reporter mRNA degradation downstream of ribosome pausing, we measured changes to  
403 YFP-CGC and YFP-CGG reporter mRNA levels during arginine and leucine limitation. Levels  
404 of YFP-CGC, which contains pause sites, were consistently 2-fold higher than levels of YFP-  
405 CGG, which does not contain pause sites, in all conditions (Supp. Fig. 6D). The addition of  
406 the reporter stabilizing ligand TMP did not affect mRNA levels (Supp. Fig. 6D). Levels of both  
407 YFP-CGC and YFP-CGG were similarly reduced by 50% upon a shift to arginine limitation  
408 and unaffected by leucine limitation (Supp. Fig. 6D). Thus, pausing is not clearly linked to a  
409 reduction in mRNA levels, and such an effect cannot explain why less protein is produced  
410 from the YFP-CGC reporter specifically upon arginine limitation.

411 To determine whether premature abortive termination might instead account for the reduction  
412 of protein synthesis rate by ribosome pausing, as previously described in bacteria  
413 (Subramaniam et al., 2014), we modified our protein synthesis rate reporter to detect  
414 termination at pause-inducing codons. We inserted a tandem repeat of 8 pause-inducing or  
415 non-pause-inducing codons in between the YFP and DHFR domains (Fig. 6F). The full-length  
416 YFP-DHFR protein will be degraded efficiently and result in no fluorescence signal. However,  
417 abortive termination at the pause-inducing codons would prevent synthesis of the DHFR

418 degron and therefore generate stable YFP. Indeed, we observed a 100-fold increase in YFP  
419 fluorescence signal specifically upon leucine limitation when 8 tandem pause-inducing UUG  
420 leucine codons (Fig. 4F) were inserted and the reporter (UUG8) was expressed in the GCN2  
421 KO cell line (Fig. 6G). We confirmed that the size of the UUG8 reporter protein corresponded  
422 to the predicted size for the premature truncation product in this condition (Fig. 6H). By  
423 contrast, we detected only a minor fluorescence increase for the CUA8 reporter upon leucine  
424 limitation (Fig. 6G), and the size of the polypeptide produced in this case corresponded to the  
425 full length reporter (Fig. 6H). There was no evidence for premature termination of UUG  
426 reporter translation in wild-type cells, in which pausing does not occur at UUG codons (Fig.  
427 1A-C), or during limitation for a non-cognate amino acid or in rich conditions. Abortive  
428 termination in GCN2 KO cells during leucine limitation correlated positively with the number of  
429 pause-inducing codons in the reporter, was detectable when as few as 2 pause sites were  
430 present (Fig. 6I), and did not reduce mRNA levels (Supp. Fig. 6E). In fact, abortive  
431 termination was associated with increased mRNA level, which may be explained by increased  
432 ribosome loading due to stalling upstream of tandem pause sites (Edri and Tuller, 2014). We  
433 did not find evidence for similar levels of premature termination at arginine codons during  
434 arginine limitation in wild-type cells. This may be because premature termination products are  
435 rapidly degraded in these conditions, as polyarginine tracts can trigger ribosome quality  
436 control responses (Brandman and Hegde, 2016).

437 Based on our observation that ribosome pausing reduced protein expression, we sought to  
438 identify endogenous proteins whose levels might be regulated by pause-inducing codons  
439 during arginine limitation. Towards this goal, we calculated the bias in usage of the pause-  
440 inducing arginine codons CGC and CGT for 18,660 coding sequences in the human genome  
441 from the genome-wide average usage frequency of these arginine codons (Supp. Fig. 6F).

442 Among coding sequences biased against use of pause-inducing arginine codons, we found  
443 significant enrichment for GO terms broadly related to organelle organization, macromolecule  
444 and nitrogen-compound metabolism, RNA processing, and positive regulation of GTPase  
445 activity (Supp. Fig. 6G, left plot). Conversely, genes with bias in favor of CGC and CGT  
446 codons were significantly enriched for GO terms related to nucleosomes, intermediate  
447 filaments, and ion channels involved in neuronal signal transduction (Supp. Fig. 6G, right  
448 plot). Given our evidence that ribosome pausing can regulate protein production rates and  
449 stimulate premature termination, the genes we identified as being enriched in pause sites are  
450 likely to be more translationally repressed upon a shift to arginine-limiting conditions than  
451 those depleted of pause sites.

## 452 **Discussion**

453 In this work, we investigated how synonymous codons and amino acid availability interact to  
454 regulate protein synthesis. We found that ribosome pausing emerges during arginine  
455 limitation at two of the six synonymous codons for arginine. We did not find evidence for  
456 ribosome pausing at rare codons, or a relationship between pausing and codon optimality or  
457 genomic copy number of the cognate tRNA. Instead, it reflected a specific loss of charging for  
458 the isoacceptor tRNA(s) that decode those codons. Ribosome pausing developed only in  
459 certain environments; ribosomes paused during arginine but not leucine limitation. Rendering  
460 these signaling pathways unresponsive to amino acid limitation was sufficient to induce  
461 pausing upon leucine limitation, implicating them as upstream determinants of ribosome  
462 pausing and thus suggesting that their intrinsic response to arginine limitation is too weak to  
463 prevent loss of tRNA charging and the emergence of ribosome pausing. Pausing reduced  
464 both global protein synthesis rates as well as expression of specific reporter and endogenous  
465 coding sequences. Interestingly, such an effect would not be apparent in ribosome profiling

466 data, as increased ribosome density due to ribosome pausing on a transcript would be  
467 associated with reduced protein production. Finally, we found that excessive pausing in the  
468 absence of a signaling response to amino acid limitation can result in premature abortive  
469 termination at pause-inducing codons.

470 Despite recent evidence that tRNA level and synonymous codon usage influence translation  
471 in mammalian systems (Gingold et al., 2014; Goodarzi et al., 2016; Saikia et al., 2016), we  
472 did not find a correlation between ribosome pausing upon arginine limitation and these  
473 quantities. Ribosome pausing observed in bacteria is also not explained by these measures  
474 (Subramaniam et al., 2013b, 2014). However, an exact accounting of the tRNA supply for  
475 each codon is challenging given the degeneracy introduced by wobble decoding, extensive  
476 tRNA modifications that influence codon reading, and multiple codons which compete for a  
477 single tRNA species. Furthermore, we did not measure tRNA levels but used tRNA gene  
478 number to estimate them. Therefore, we cannot exclude the possibility that a more accurate  
479 accounting of tRNA supply would explain the observed hierarchy of ribosome pausing.  
480 However, it is more likely the balance between tRNA supply and codon usage demand which  
481 determines differential isoacceptor sensitivity to changes in arginine levels, as observed in  
482 bacteria (Dittmar et al., 2005; Elf et al., 2003). We propose that a consideration of nutrient  
483 context is critical for defining which codons or tRNAs are functionally “optimal”.

484 Our measurements of tRNA charging loss upstream of ribosome pausing suggest that even a  
485 50% charging level for many tRNAs upon amino acid limitation was insufficient to cause  
486 ribosome pausing at the cognate codons. This reflects a robustness of ribosome elongation  
487 rate to fluctuations in charged tRNA concentrations, and thus changes in charged tRNA  
488 concentrations (Saikia et al., 2016) might not always cause changes in translation elongation  
489 rate. This finding is also consistent with the proposal that tRNA abundance in mammals is

490 unlikely to be evolutionarily optimized for globally efficient translation (Galtier et al., 2017).  
491 Instead, an understanding of what underlies the sensitivity of charging for specific isoacceptor  
492 to amino acid levels may reveal the evolutionary forces shaping translation elongation.

493 Our finding that the mTORC1 and GCN2 pathways respond more potently to limitation for  
494 different single amino acids highlights an unusual divergence in their roles, challenging the  
495 idea that both pathways act co-ordinately to sense amino acid limitation and appropriately  
496 regulate translation rate (Park et al., 2017). The mTORC1 response was clearly non-optimal  
497 with respect to preserving arginine homeostasis for protein synthesis: mTORC1 responds  
498 more weakly to arginine than leucine limitation, even though arginine becomes more rate-  
499 limiting for translation than leucine. Given that direct sensors for arginine (Chantranupong et  
500 al., 2016; Wang et al., 2015) and leucine (Wolfson et al., 2016) have been identified in the  
501 mTORC1 pathway, this observation is surprising; it suggests that the arginine sensors are  
502 unable to optimally sense arginine levels and thereby prevent ribosome pausing at arginine  
503 codons, while in contrast the leucine sensor can perform this function. One possibility is that  
504 in the context of a tissue or a whole organism, arginine limitation might be typically  
505 accompanied by additional cue(s) to stimulate an optimal mTORC1 response, and limitation  
506 for only arginine *in vitro* might be insufficient to evoke this response. Investigating the  
507 response to arginine limitation *in vivo* will shed light on the role of mTORC1 in regulating  
508 arginine consumption.

509 In contrast to mTORC1, GCN2 — which senses uncharged tRNA — appears to respond  
510 optimally; it is equally or more strongly activated during arginine than leucine limitation across  
511 all three cell lines. This raises the question of why this robust GCN2 response is insufficient to  
512 prevent pausing. It has been recently shown that GCN2 can also sense ribosome pausing,  
513 creating a feedback regulation loop between elongation and initiation rates (Ishimura et al.,

514 2016). Therefore, GCN2 activation may in part be downstream of the emergence of ribosome  
515 pausing. Dissecting the dynamics of the GCN2 response to amino acid limitation with respect  
516 to the emergence of ribosome pausing will clarify whether its role is primarily to prevent, or to  
517 respond to, such a loss of amino acid homeostasis. Irrespective of whether it is upstream or  
518 downstream of ribosome pausing, the GCN2 response is insufficient to prevent pausing at the  
519 timescales explored in this study.

520 We found that the response through the mTORC1 and GCN2 pathways to single amino acid  
521 limitation determines the magnitude of ribosome pausing, presumably by controlling the flux  
522 of that amino acid towards anabolic processes and thereby its availability for tRNA charging  
523 and translation. This hypothesis is supported by the observation that nonessential amino  
524 acids such as glutamine and serine contribute predominately to protein synthesis rather than  
525 to cellular metabolite pools in multiple human cell lines (Hosios et al., 2016) As these two  
526 signaling pathways regulate multiple facets of cellular metabolism and growth in addition to  
527 global translation (Castilho et al., 2014; Laplante and Sabatini, 2013), it is difficult to pinpoint  
528 the principal metabolic process that determines the level of each amino acid during its  
529 limitation. However, a major role for arginine and leucine flux into translation is supported by  
530 our finding that a brief treatment of starved cells with the elongation inhibitor cycloheximide  
531 led to recovery of arginine and leucine tRNA charging (Supp. Fig. 4I). Interestingly, inhibition  
532 of elongation did not completely rescue tRNA<sup>Arg</sup><sub>ACG</sub> charging. As arginine is a nonessential  
533 amino acid with several routes for usage in metabolism (Morris, 2007), it is likely that arginine  
534 levels during its limitation are also influenced by the flux through these pathways. We expect  
535 that perturbing the activity of individual effectors downstream of mTORC1 and GCN2 kinases  
536 will identify the contribution of individual metabolic processes to homeostasis of the limited  
537 amino acid.

538 Although we found that the signaling response to amino acid limitation was necessary to  
539 prevent ribosome pausing in HEK293T cells, we note that other mechanisms may exert  
540 control over ribosome pausing in distinct cell types. For example, high rates of protein  
541 catabolism or lysosomal amino acid content could buffer intracellular amino acid levels.  
542 Alternatively, a slow cell growth and division cycle or low global protein synthesis capacity  
543 could reduce amino acid consumption rates. Indeed, we found no ribosome pausing at  
544 leucine codons upon limitation for leucine in HCT116 cells despite a weak amino acid  
545 signaling response (Fig. 3C-F, Supp. Fig. 3G). A mechanistic investigation in multiple cell  
546 types will clarify the range of cellular processes that exert control over ribosome pausing.  
547 We find that ribosome pausing reduces both global and gene-specific protein synthesis rates.  
548 The effects of slow translation at specific codons on protein production have been widely  
549 linked to mRNA decay: recent work in yeast has suggested that ribosome stalling at non-  
550 optimal codons represses protein synthesis rates by increasing mRNA decay rates (Presnyak  
551 et al., 2015; Radhakrishnan et al., 2016). Stalled ribosomes at truncated or damaged RNAs  
552 or polybasic sequences are targeted by “no-go decay” (NGD) pathways (Shoemaker and  
553 Green, 2012; Simms et al., 2017), which induce endonucleolytic cleavage and degradation of  
554 nascent chain polypeptides (Brandman and Hegde, 2016). We did not find evidence for a  
555 reduction in mRNA levels due to pausing, although we cannot exclude an increase in mRNA  
556 decay rate balanced by an increased synthesis rate. In addition, measurements of total  
557 mRNA levels cannot be easily compared to protein production rates because they may  
558 include untranslated mRNAs. It is notable, though, that significant changes in mRNA levels  
559 have not been observed in cases where protein production is altered by ribosome pausing at  
560 specific codons during amino acid limitation (Saikia et al., 2016; Subramaniam et al., 2013b,  
561 2013a, 2014). Perhaps pausing during limitation in the presence of excess uncharged tRNA



562 is qualitatively different from typical “no-go” pauses that result from overall tRNA scarcity, and  
563 thus might not stimulate NGD (Buskirk and Green, 2017). We did find evidence for truncated  
564 nascent peptides upon ribosome pausing at leucine codons in GCN2 KO cells, suggesting  
565 that pausing due to limiting charged tRNA can trigger abortive termination of translation,  
566 although the factors involved remain to be elucidated.

567 Finally, our work raises the question of whether cell-autonomous ribosome pausing is a  
568 deleterious, neutral, or an adaptive response. In bacteria, ribosome stalling during amino acid  
569 limitation is used as a sensor for upregulating amino acid biosynthesis genes and for entering  
570 into a biofilm state, suggesting an adaptive role for ribosome pausing (Dittmar et al., 2005;  
571 Subramaniam et al., 2013b). By contrast, in *S. cerevisiae*, an insufficient TOR response to  
572 leucine limitation leads to loss of cell viability, and is thus considered to be “non-optimal”  
573 (Boer et al., 2008). Analogously, we find that ribosome pausing upon leucine or arginine  
574 limitation is linked to a loss of cell viability (Supp. Fig. 7), and it is well known that arginine  
575 limitation induces cell death in multiple cancer cell lines (Lind, 2004). Ribosome pausing has  
576 also been linked to disease states in mouse and human tissues (Ishimura et al., 2014;  
577 Loayza-Puch et al., 2016a). These results suggest that pausing may have a deleterious effect  
578 on the cell, for example via protein misfolding or mistranslation stress (Drummond and Wilke,  
579 2008). Pausing might also be a symptom of an upstream loss of metabolic homeostasis;  
580 constitutive mTORC1 signaling and elevated consumption of specific amino acids, which  
581 according to our findings may synergistically induce ribosome pausing, are characteristic  
582 features of certain cancers (Hattori et al., 2017; Jain et al., 2012; Knott et al., 2018; Krall et  
583 al., 2016; Loayza-Puch et al., 2016a; Possemato et al., 2011; Scott et al., 2000; Wise and  
584 Thompson, 2010). Alternatively, our finding that genes broadly involved in RNA metabolism  
585 are biased against the use of arginine pause site codons suggests that ribosome pausing

586 might play a role in metabolic adaptation to arginine limitation, as arginine can contribute to  
587 nucleotide synthesis via aspartate (Rabinovich et al., 2015). Further, histone genes are  
588 biased towards use of pause sites, and reduced production of nucleosomes could underlie  
589 the S-phase cell cycle arrest that accompanies arginine limitation (Nelson et al., 2002; Scott  
590 et al., 2000) – though it is unclear whether a prolonged S-phase would be adaptive or  
591 detrimental. Therefore, it will be important to determine whether ribosome pausing in this and  
592 other contexts plays a positive role in adapting cellular metabolism and gene expression to  
593 amino acid limitation, or instead increases cellular stress under these conditions.

## 594 **Materials and Methods**

### 595 **Raw data and code for generation of figures**

596 Full code and detailed instructions for generating the final figures in our paper starting from  
597 raw sequencing data is provided as a README.md file and an interactive Jupyter notebook  
598 (Perez and Granger, 2007) in the following Github repository  
599 ([https://github.com/rasilab/adarnell\\_2018](https://github.com/rasilab/adarnell_2018)).

### 600 **Construction of plasmids**

601 All plasmids and cell lines are included in a key resources table supplementary file.

602 AAVS1-CAG-hrGFP was from Su-Chun Zhang (Addgene plasmid # 52344) (Qian et al.,  
603 2014). We cloned sequences for Flag-RagB-WT and Flag-RagB-Q99L into this plasmid in  
604 place of hrGFP, from sequences in Flag pLJM1 RagB wt (Addgene plasmid # 19313) and  
605 Flag pLJM1 RagB 99L (Addgene plasmid # 19315) from David Sabatini (Sancak et al., 2008).  
606 The resulting CRISPR homology donor plasmids AAVS1-CAG-hrGFP, AAVS1-CAG-  
607 RagBWT, and AAVS1-CAG-RagBQ99L were then introduced into HEK293T cells by  
608 CRISPR/Cas9 mediated homologous recombination with the AAVS1 sgRNA and Cas9  
609 expression plasmid px330-AAVS1-T2 (see Stable overexpression cell line generation by  
610 CRISPR/Cas9 genome editing section). px330-AAVS1-T2 was cloned by inserting the  
611 AAVS1-T2 target sequence (GGGGCCACTAGGGACAGGAT) (Mali et al., 2013) into the  
612 px330-U6-Chimeric-BB-CBh-hSpCas9 plasmid, from Feng Zhang (Addgene # 42230) (Cong  
613 et al., 2013) (see Fig. 4C).

614  
615 To generate sgRNA plasmids for targeting endogenous GCN2 (alias EIF2AK4) and EEF2K  
616 (see Supp. Fig. 4G and 5D), sgRNA sequences were obtained from a list of validated guides  
617 from the 3<sup>rd</sup> generation lentiGuide-Puro library (Doench et al., 2016). Two sgRNA sequences  
618 each targeting exonic sequences ~790 bp apart in GCN2 (from Addgene plasmids #75876  
619 and 75877), and ~230 bp apart in EEF2K (from Addgene plasmids #77855 and 77856), were  
620 selected. For each pair targeting a gene, one sgRNA was cloned into pU6-(BbsI)\_CBh-Cas9-

621 T2A-BFP, from Ralf Kuehn (Addgene plasmid # 64323) (Chu et al., 2015), and the other was  
622 cloned into pSpCas9(BB)-2A-GFP (PX458), from Feng Zhang (Addgene plasmid # 48138)  
623 (Ran et al., 2013) using T4 DNA ligase (NEB) after BbsI digestion. This produced the  
624 targeting sgRNA-Cas9 plasmids pU6-GCN2-1-Cas9-2A-BFP, pU6-GCN2-2-Cas9-2A-GFP,  
625 pU6-EEF2K-1-Cas9-2A-BFP, and pU6-EEF2K-2-Cas9-2A-GFP. For generation of knockout  
626 cell lines, see Knockout cell line generation by CRISPR/Cas9 genome editing section.  
627

628 Our YFP-DHFR protein synthesis rate reporters (see Fig. 6A) were built by cloning from  
629 pLJM1-EGFP, from David Sabatini (Addgene plasmid # 19319) (Sancak et al., 2008). The  
630 EGFP coding sequence in this vector was replaced by the YFP-DHFR sequence from  
631 KHT61-Unreg-YFP-DD, a gift from Kyuho Han (Han et al., 2014)), along with an N-terminal  
632 Flag epitope tag to generate the base “wild-type” (YFP-WT) pLJM1-Flag-YFP-DHFR reporter  
633 was cloned into pLJM1 in place of EGFP. The YFP-WT reporter has 13 CGC and 1 CGU  
634 arginine codons, and 23 CUG, 5 CUC, 2 UUA, and 2 UUG leucine codons. To generate  
635 codon variants, synthetic DNA gBlocks (IDT) were ordered in which all 14 arginine codons in  
636 YFP and DHFR, or all 21 leucine codons in YFP were swapped to one out of each of the six  
637 synonymous arginine or leucine codons; these gBlocks were amplified by PCR and cloned in  
638 place of the YFP-WT sequence in the pLJM1 plasmid backbone. The following library of Flag-  
639 tagged codon variant reporter lentiviral donor plasmids was generated: YFP-WT, YFP-CGG,  
640 YFP-CGA, YFP-CGU, YFP-AGA, YFP-AGG, YFP-CUA, YFP-CUC, YFP-CUU, YFP-UUA,  
641 and YFP-UUG. These plasmids were used to generate stable reporter cell lines by lentiviral  
642 transduction into HEK293T, HeLa, HCT116, and the HEK293T GCN2 KO cell line (see Stable  
643 overexpression cell line generation by lentiviral transduction section).

644 The YFP-DHFR protein synthesis rate reporters were modified to generate premature  
645 termination reporters (see Fig. 6F) by cloning in eight tandem leucine codons into the pLJM1-  
646 YFP-CUA lentiviral donor plasmid in between the YFP and DHFR sequences. YFP and  
647 DHFR were amplified by PCR with leucine codons added in the reverse primer overhang  
648 sequences for YFP and forward primer overhang sequences for DHFR, and these sequences  
649 were then re-assembled into the pLJM1 backbone. The following library of four Flag-tagged  
650 premature termination reporter lentiviral donor plasmids was generated, in which the codon  
651 and following number refer to the composition of the eight tandem leucine codon repeat:  
652 UUG8, CUA8, CUA4UUG4, CUA6UUG2. These plasmids were used to generate stable  
653 reporter cell lines by lentiviral transduction into HEK293T and the HEK293T GCN2 KO cell  
654 line (see Stable overexpression cell line generation by lentiviral transduction section).  
655

656 A variant YFP-DHFR protein synthesis rate reporter (see Supp. Fig. 5B) was built by cloning  
657 from pAAVS1P-iCAG.copGFP, from Jizhong Zou (Addgene plasmid # 66577) (Cerbini et al.,  
658 2015). To generate pAAVS1P-iCAG.FlagYFP-DHFR-WT and -CGG codon variant reporters,  
659 sequences from pLJM1-Flag-YFP-DHFR-WT (YFP-WT) and YFP-CGG were cloned in place  
660 of copGFP. These plasmids were used as homology donors to generate stable reporter cell  
661 lines in HEK293T cells by CRISPR/Cas9-mediated homologous recombination with the  
662 AAVS1 sgRNA and Cas9 expression plasmid px330-AAVS1-T2 (as for the AAVS1-CAG-  
663 hrGFP and its derivative plasmids described above; see Stable overexpression cell line  
664 generation by CRISPR/Cas9 genome editing section).  
665

## 666 **Cell culture and amino acid limitation**

667 HEK293T, HeLa, and HCT116 adherent cells (HEK293T and HeLa obtained from ATCC,  
668 catalog numbers CRL-3216 and CCL-2; HCT116 obtained from the National Cancer Institute  
669 (NCI) panel of 60 cancer cell lines) were passaged in high-glucose DMEM without pyruvate  
670 (Gibco) with penicillin/streptomycin (Corning) and 10% fetal bovine serum (FBS; ATCC  
671 catalog number 30-2020). Amino acid limitation media were prepared from low glucose  
672 DMEM powder without amino acids (US Biological catalog number D9800-13) according to  
673 manufacturer's instructions; all amino acids except leucine and arginine, and glucose were  
674 supplemented according to this recipe: 3 g/L additional glucose, 30 mg/L glycine, 63 mg/L  
675 cysteine 2·HCl, 580 mg/L glutamine, 42 mg/L histidine HCl·H<sub>2</sub>O, 105 mg/L isoleucine, 146  
676 mg/L lysine HCl, 30 mg/L methionine, 66 mg/L phenylalanine, 42 mg/L serine, 95 mg/L  
677 threonine, 16 mg/L tryptophan, 64 mg/L tyrosine 2·Na 2·H<sub>2</sub>O, and 94 mg/L valine. Media was  
678 subject to vacuum filtration and then supplemented with 10% dialyzed FBS (Invitrogen  
679 catalog number 26400-044) before use. For all amino acid limitation assays – except time  
680 course experiments over multiple days (see sections for Flow cytometry and Cell viability) –  
681 cells were expanded to 75% confluency, washed once in PBS, and transferred to limitation  
682 medium supplemented with either leucine (for arginine limitation) or arginine (for leucine  
683 limitation), or both (for rich medium).

684 For all experiments, technical replicates refer to the repetition an entire experiment with a  
685 separate dish of cells split off from the same parental cell line (i.e. produced from the same  
686 lentiviral transduction or CRISPR editing process).

## 687 **Stable overexpression cell line generation by lentiviral transduction**

688 HEK293T cells were transfected at 75% confluency in a 10 cm plate with donor expression  
689 plasmid pLJM1 containing the desired insert, and the lentiviral packaging plasmids psPAX2,  
690 from Didier Trono (Addgene plasmid # 12260), and pCMV-VSV-G, from Bob Weinberg  
691 (Addgene plasmid # 8454) (Stewart et al., 2003) in a 10:9:1 ratio (by weight) using  
692 Lipofectamine 3000 (Invitrogen), according to the manufacturer's instructions. The media was  
693 replaced after 12-16 hours, and lentivirus was harvested at 48 hours by passing culture  
694 supernatant through a low-protein binding filter with 0.45 µm pore size. 1 mL of virus was  
695 used to transduce 50-60% confluent cells in a 6 cm plate. Cells were passaged to a 10 cm  
696 plate after 24 hours, and antibiotic selection was performed after 48 hours by adding  
697 puromycin (2 µg/ml for HEK293T cells, 1 µg/ml for HCT116, HeLa cells). Cells were  
698 passaged in selection media for 2-4 days, until non-transduced cells treated with puromycin in  
699 a parallel plate were fully dead, and were then expanded for generation of stocks and  
700 experiments.

## 701 **Stable overexpression cell line generation by CRISPR/Cas9 genome editing**

702 All transfections were performed at 75% confluency using Lipofectamine 3000, according to  
703 manufacturer's instructions.

704 To generate hrGFP, RagB-WT, and RagB-Q99L cell lines (see Fig. 4C): HEK293T cells in a 6  
705 well plate were transfected with homology donor plasmid (pAAVS1-CAG-hrGFP, pAAVS1-  
706 CAG-RagBWT, or pAAVS1-CAG-RagBQ99L) and the px330-AAVS1-T2 guide RNA plasmid  
707 at a ratio of 4:1 (2 µg donor : 500 ng guide). Homologous recombination and expression of

708 the hrGFP fluorescent protein or FLAG-tagged RagB transgenes was confirmed in the  
709 resulting polyclonal population by PCR, flow cytometry, and western blotting after puromycin  
710 selection (as described in “Stable overexpression cell line generation by lentiviral  
711 transduction”).

712 To generate arginine/leucine codon variant YFP-DHFR reporter cells lines (see Supp. Fig.  
713 6B): HEK293T cells in a 10 cm plate were transfected with homology donor plasmid (for YFP  
714 reporter lines: pAAVS1P-iCAG.copGFP, pAAVS1P-iCAG.Flag-YFP-DHFR-WT, pAAVS1P-  
715 iCAG.Flag-YFP-DHFR-CGG) and px330-AAVS1-T2 guide RNA plasmid at a ratio of 2:1 (10  
716 µg donor : 5 µg guide). Homologous recombination and TMP-inducible YFP fluorescence  
717 were confirmed in the resulting polyclonal population by PCR, flow cytometry, and western  
718 blotting after puromycin selection (as described in “Stable overexpression cell line generation  
719 by lentiviral transduction”).

## 720 **Knockout cell line generation by CRISPR/Cas9 genome editing**

721 75% confluent HEK293T cells in a 12 well plate were transfected with 500 ng of each  
722 targeting RNA plasmid, using Lipofectamine 3000 according to the manufacturer’s  
723 instructions, in the following four combinations: 1) both pU6-GCN2-1-Cas9-2A-BFP and pU6-  
724 GCN2-2-Cas9-2A-GFP, 2) both pU6-EEF2K-1-Cas9-2A-BFP and pU6-EEF2K-2-Cas9-2A-  
725 GFP, 3) pU6-GCN2-1-Cas9-2A-BFP only, and 4) pU6-GCN2-2-Cas9-2A-GFP only. Cells  
726 were transferred to a 6 well plate 24 hours post transfection. Single fluorescent (BFP+/GFP+)  
727 cells were sorted into individual wells of a 96 well plate by FACS. 96 well plates with isolated  
728 clones were spun 100xG for 1 minute to sediment cells. Clones were allowed to expand for  
729 14 days and then passaged for generation of stocks and Western blot analysis to confirm  
730 complete knockout of GCN2 or EEF2K. 92% of clones tested in this manner were positive for  
731 complete GCN2 KO (11/12), 83% were positive for EEF2K KO (10/12) (see Supp. Figs 4G  
732 and 5D).

## 733 **Ribosome profiling**

734 To detect codon-specific ribosome pausing, ribosome profiling was performed according to  
735 the following protocol (Ingolia et al., 2009), with modifications detailed below (see Fig. 1,4 and  
736 Supp. Fig. 1,4).

737 Cells were expanded to 75% confluency in two 15 cm plates harvested for ribosome profiling.  
738 Cells were washed once, briefly, in ice cold PBS. PBS was thoroughly drained, and plates  
739 were immediately immersed in liquid nitrogen for flash freezing and then transferred to -80C.  
740 Frozen cells were lysed on each plate by scraping into 300 µL lysis buffer (20 mM Tris pH  
741 7.5, 15 mM MgCl<sub>2</sub>, 150 mM NaCl, 100 µg/mL cycloheximide, 5 mM CaCl<sub>2</sub>, 1% Triton, 50  
742 U/mL Turbo DNase), and lysates from the two 15 cm plates were combined to yield ~1 mL of  
743 lysate. Ribosome footprints were generated from 450 µL of lysate by 1 hour of digestion with  
744 800 U micrococcal nuclease (MNase, Worthington Biochemical) at room temperature (25°C)  
745 with nutation, which was quenched by addition of 4.5 µL 0.5 M EGTA. Footprints were  
746 purified by sucrose density gradient fractionation; a BioComp Gradient Station was used to  
747 generate 10-50% sucrose density gradients (Seton Polyclear 14x89 mm tubes) in 1X  
748 polysome resuspension buffer (20 mM Tris pH 7.5, 15 mM MgCl<sub>2</sub>, 150 mM NaCl, 100 µg/mL  
749 cycloheximide). 400 µL MNase digested lysate were loaded onto gradients in SW41 rotor  
750 buckets (Beckman Coulter) after removing 260 µL of the gradient from the top, and samples

751 were ultracentrifuged in an SW41 rotor for 2.5 hours at 35,000 RPM and 4°C (Beckman  
752 Coulter). Fractionation was performed at 0.22 mm/sec with UV absorbance monitoring at 254  
753 nm (EconoUV Monitor) and the monosome fraction was collected in addition to the  
754 contiguous disome “shoulder” (~2.5 mL in total). Total RNA was purified from sucrose solution  
755 by addition of 7 mM EDTA and 1% SDS, extraction in Acid-Phenol:Chloroform pH 4.5 with  
756 isoamyl alcohol at 25:24:1 (Invitrogen) at 65°C, and extraction in chloroform. RNA was  
757 precipitated by addition of 1/9<sup>th</sup> volume 3M NaOAc pH 5.5, 2 µL Glycoblue (Applied  
758 Biosystems), and isopropanol to the aqueous supernatant.

759 Ribosome footprints were purified by loading 8 µg of the gradient fraction RNA on 15% TBE-  
760 Urea gel (Bio-Rad) and electrophoresed at 200V for 65 minutes alongside the 3'  
761 phosphorylated 26 nt RNA NI-NI-20 (Ingolia et al., 2012) and low range ssRNA ladder (NEB)  
762 as size standards, gel was stained in SYBR Gold, and footprints were excised in a wide range  
763 from ~26-40 nt. Gel slices were passed through a 0.6 mL tube with a needle hole in the  
764 bottom nested in a 1.5 mL tube to create a gel slurry, and RNA was extracted in 0.3 M  
765 NaOAc pH 5.5, 1 mM EDTA, and 100 U/mL Superase-In (Invitrogen) overnight at room  
766 temperature with rotating and then precipitated by addition of 2ul glycoblue and isopropanol.

767 Footprints were dephosphorylated with T4 PNK (NEB) according to the manufacturer's  
768 instructions for 1 hour at 37°C, then precipitated. Footprints were then polyA-tailed with *E. coli*  
769 polyA polymerase (NEB) according to the manufacturer's instructions for 10 minutes at 37°C,  
770 then precipitated. Reverse transcription was performed using SuperScriptIII (Invitrogen) and  
771 0.5 µM oNTI19pA oligo primer (Ingolia et al., 2009) for 30 minutes at 48°C, and RT products  
772 were purified by running a 10% TBE-Urea gel at 200V for 65 minutes, using a “no template”  
773 sample as a size standard for the RT primer alone. RT products were purified from gel slices  
774 using the approach described above for ribosome footprints (in 0.3 M NaCl, 1 mM EDTA, and  
775 0.25% SDS) and then precipitated. RT products were circularized with CirLigase (Epicentre)  
776 for 60 minutes at 60°C, then precipitated. rRNA was removed by subtractive hybridization with  
777 MyOne Streptavidin Dynabeads; biotinylated reverse complement oligos to two discrete rRNA  
778 sequences that were recovered extremely abundantly in our test ribosome profiling libraries  
779 (o3285, o3287) were annealed to circularized libraries in a Thermocycler, beads were  
780 prepared according to (Ingolia et al., 2012) and an equal volume was added to annealed  
781 oligo/libraries for 15 minutes at 37°C. Supernatant was recovered and precipitated. Resulting  
782 libraries were amplified by 6-12 cycles of PCR with common (reverse) and unique 6nt index  
783 (forward) library primers and purified after running on a 10% TBE gel at 200V for 60 minutes.  
784 ~170 nt dsDNA libraries were extracted from gel slices using same method as for RT  
785 products, precipitated, resuspended in 10 µL Tris 10 mM pH 7, and quantified using a  
786 TapeStation or BioAnalyzer instrument. Up to 15 multiplexed libraries were submitted for  
787 sequencing on both lanes of an Illumina HiSeq 2500 Rapid Flow Cell at 3-4 nM in <10 µL.  
788 Sequencing runs yielded approximately 150 million reads in total for all multiplexed libraries.

789 Notably, two ribonucleases, RNase I and micrococcal nuclease (MNase), are commonly used  
790 for ribosome profiling (MGlincy and Ingolia, 2017). We analyzed monosome-bound RNA  
791 footprint generation by these enzymes using sucrose density gradient fractionation. We  
792 observed near-complete degradation of the 60S ribosomal subunit and ribosome-bound  
793 mRNA fractions by RNase I in buffers with either high (Ingolia et al., 2012) or low magnesium  
794 (Andreev et al., 2015) and across a broad range of RNase I concentrations (Supp. Fig. 1A,B),  
795 similar to results obtained in *Drosophila* (Dunn et al., 2013). In contrast, the 60S and  
796 monosome fractions were largely intact after digestion with MNase (Supp. Fig. 1C), and

797 therefore we used this nuclease to generate monosome-bound RNA footprints, which were  
798 then purified by sucrose density gradient fractionation and size selection (Supp. Fig. 1D)  
799 before sequencing. As previously reported (Dunn et al., 2013; Reid et al., 2015), MNase  
800 results in slightly longer reads and a broader read length distribution (Supp. Fig. 1E) as it  
801 does not digest completely around bound ribosomes. However, read density exhibited robust  
802 three nucleotide periodicity (Supp. Fig. 1G, lower panel), is clearly enriched in the coding  
803 region, and exhibits peaks at start and stop codons (Supp. Fig. 1F,G), allowing resolution of  
804 codon-level changes in translation elongation.

## 805 **Ribosome profiling data analysis**

806 Analysis was performed using R and Bash programming languages. Full code and detailed  
807 instructions for generating the final figures in our paper starting from raw sequencing data is  
808 provided as a README.md file and an interactive Jupyter notebook (Perez and Granger,  
809 2007) in the following Github repository ([https://github.com/rasilab/adarnell\\_2018](https://github.com/rasilab/adarnell_2018)).  
810 The polyA tail was trimmed from 50 nt single-end raw sequencing reads using `cutadapt`  
811 (Martin, 2011) with a minimum length cutoff of 13 nt. A subtractive alignment was performed  
812 against ribosomal RNA using `bowtie` (Langmead et al., 2009), and the remaining reads were  
813 aligned to a transcriptome index using `rsem` and `bowtie` (Li and Dewey, 2011). To calculate  
814 the pre-processing statistics and assess library quality (Supp. Fig. 1E-G), we used 3' trimming  
815 of 12 nt for reads  $\leq 32$  nt and 13 nt trimming for reads  $> 32$  nt to demonstrate 3 nt  
816 periodicity. However for the rest of the analyses, since we were interested in the overall  
817 increase in ribosome occupancy at codons and frame information was not required for this  
818 analysis, we trimmed 12 nt from both sides to smooth our ribosome density profiles as  
819 described in previous MNase-based studies in bacteria (Li et al., 2012; Oh et al., 2011;  
820 Subramaniam et al., 2014). To calculate reads counts for each transcript, each transcript  
821 position aligning to the trimmed read was assigned a count of the inverse value of the read  
822 length. The DESeq2 package was used to normalize each sample and then calculate gene  
823 fold changes (see for example Fig. 3C,D) (Love et al., 2014).

824 To calculate the average ribosome occupancy around each codon, only transcripts with a  
825 minimum read density of 1 read per codon were considered. Reads at each transcript position  
826 were first normalized to the mean read count for that transcript. For each codon, the average  
827 read coverage was found for each position in a 150 nt window on either side of all  
828 occurrences of that codon.

829 To calculate the change in average ribosome occupancy around each codon upon amino acid  
830 limitation (see for example Fig. 1B), the average ribosome occupancy at each position in the  
831 150 nt window around the codon in rich conditions was subtracted from that in an amino acid  
832 limited condition. To calculate the summed ribosome occupancy at each codon (see for  
833 example Fig. 1A), this 300 nt average ribosome occupancy vector for each codon was  
834 summed.

## 835 **Polysome profiling**

836 The same procedure as in the “Ribosome profiling” section was used, with the following  
837 modifications (see Fig. and Supp. Fig. 5). Nuclease digestion was excluded, and 150  $\mu$ L of  
838 clarified lysate was loaded directly onto sucrose density gradients. Gradients were  
839 centrifuged in a SW41 rotor at 35,000 RPM for 3 hours at 4°C with the “slow” brake setting

840 (Beckman Coulter). Polysome profiles were analyzed by fractionation at 0.22 mm/second  
841 using the BioComp Gradient Station and Gradient Profiler software, with UV monitoring at  
842 A254 nm (EconoUV). The relative polysome to monosome fraction area was calculated for  
843 each profile by 1) subjective definition of the fraction boundaries, 2) subtracting the lowest  
844 value in the profile from all points along the profile, and 3) manual integration using the  
845 trapezoid rule (see Supp. Fig. 5C).

## 846 **tRNA charging analysis**

847 tRNA charging analysis was performed according to (Varshney et al., 1991) with the following  
848 modifications (see Fig. 2 and Supp. Fig. 4). 75% confluent cells in a 10 cm plate were washed  
849 once in PBS and flash frozen. Cells were scraped into ice cold 500  $\mu$ L AE buffer (0.3 M  
850 NaOAc pH 4.5, 10 mM EDTA) on plates and added to 500  $\mu$ L ice cold acid-saturated  
851 phenol:chloroform pH 4.5 (with isoamyl alcohol, 125:24:1, Invitrogen). Extractions were  
852 vortexed hard for 10 minutes, rested on ice for 3 minutes, and spun for 10 minutes at  
853 20,000xG at 4°C. Aqueous supernatant was recovered and precipitated by adding 2  $\mu$ L  
854 glycoblue and isopropanol. The pellet was resuspended in 10 mM NaOAc pH 4.5, 1 mM  
855 EDTA. RNA was deacylated in 100 mM Tris pH 9 at 37°C for 30 minutes, then precipitated  
856 and resuspended in 10 mM NaOAc pH 4.5, 1 mM EDTA as a control for electrophoretic  
857 mobility of uncharged tRNA.

858 For acid urea gel electrophoresis, 500 ng – 1  $\mu$ g RNA and deacylated control in 0.1 M NaOAc  
859 pH 4.5, 8 M urea, 0.05% bromphenol blue, and 0.05% xylene cyanol were electrophoresed  
860 on a 0.4 mm 6.5% polyacrylamide gel with 8M urea in 0.1M NaOAc pH 4.5 at 450V and 4°C  
861 for 18-20 hours. The gel region between the loading dye bands was excised and transferred  
862 according to “Northern blotting” section.

863 Probes were designed to hybridize uniquely to tRNA isoacceptors, where possible, or  
864 isodecoders after alignment of all arginine and leucine tRNAs (sequences from the Genomic  
865 tRNA database <http://gtrnadb.ucsc.edu/> (Chan and Lowe, 2016); alignment performed using  
866 Muscle (Edgar, 2004)). tRNAs with introns and psueo-tRNAs were identified using the  
867 tRNAscan-SE program (<http://lowelab.ucsc.edu/tRNAscan-SE/>) (Lowe and Eddy, 1997). All  
868 probes were validated for specificity by Northern blotting against in vitro transcribed target  
869 tRNAs and equimolar amounts of the most likely tRNA candidate for cross-hybridization.  
870 Candidate cross-hybridizing tRNAs were identified by a genomic tRNA BLAST. We were not  
871 able to find uniquely hybridizing probe for tRNA<sup>Leu</sup><sub>AAG</sub> and tRNA<sup>Leu</sup><sub>UAG</sub> as these leucine  
872 isoacceptor genes have a great degree of sequence homology; however the major species  
873 detected for the AAG and UAG probes is the indicated tRNA.

## 874 **Western blotting**

875 75% confluent cells in a 10 cm plate were lysed by scraping and pooling in 300  $\mu$ L of 50 mM  
876 HEPES pH 7.4, 40 mM NaCl, 2 mM EDTA, 1 mM sodium orthovanadate, 10 mM sodium  
877 glycerophosphate, 10 mM sodium pyrophosphate, 50 mM sodium fluoride, 1% Triton X-100.  
878 After 10 minutes at 4°C, the insoluble fraction was cleared by centrifugation for 10 minutes at  
879 4°C and 20,000g. Lysate was electrophoresed in 1X SDS sample buffer (BioRad) on a 4-20%  
880 Tris Glycine gel (Novex) and blotted onto 0.45  $\mu$ m nitrocellulose. Primary antibodies (Cell  
881 Signaling Technology, CST) from rabbit against GCN2 (3302S), eEF2K (3692S), eEF2  
882 (2332S), P~T56 eEF2 (2331S), eIF2 $\alpha$  (5324P), P~S51 eIF2 $\alpha$  (3398P), S6K (9202S), P~T389



883 S6K (9205S), RPS6 (2217S), P~S235/236 RPS6 (4858S), GAPDH (2118S). Primary  
884 antibody from mouse against FLAG (Sigma-Aldrich, F3165) were used at 1:1000. The  
885 primary antibody from rabbit against puromycin was used at 1:25,000 (Sigma-Aldrich,  
886 MABE343). HRP-conjugated secondary antibodies were used at 1:5000 (anti-rabbit from  
887 CST, 7074S; anti-mouse from Sigma-Aldrich, 12-349). 5% BSA (CST) in TBST was used for  
888 all blocking and antibody solutions for phospho-antibody blots, and 5% milk in TBST was  
889 used for all others. SuperSignal West Femto Substrate (ThermoFisher) was used for  
890 developing, and Restore Western Blot stripping buffer (Thermo Scientific) was used to strip  
891 blots (see Fig. and Supp. Fig. 3-6).

892  
893 For dot-blotting, 2  $\mu$ L of lysate was spotted onto a 0.45  $\mu$ m nitrocellulose membrane, allowed  
894 to dry for 15 minutes, and then blots were processed as described above for western blotting  
895 (see Fig. and Supp. Fig. 5).

## 896 **Northern blotting**

897 RNA samples were run on 10% TBE-Urea gels (Criterion) or homemade acid-urea  
898 polyacrylamide gels (for tRNA charging analysis). Gels were rinsed thoroughly in 0.5X TBE  
899 and transferred to HyBond Nylon+ membrane in 0.5X TBE using a semi-dry transfer  
900 apparatus at 3 mA/cm<sup>2</sup> for 1 hour. The blot was crosslinked using the Stratalinker “auto-  
901 crosslink” setting once on each side, prehybridized in PerfectHyb (Sigma) buffer for 1 hour at  
902 64°C, and hybridized at 64°C with 5 pmol probe. Probes were end-labelled with T4 PNK using  
903 [ $\gamma$ -P<sup>32</sup>]-ATP and purified with G25 sepharose columns (GE Healthcare Life Sciences). The  
904 blot was washed 2x in a low-stringency wash buffer (2X SSC, 0.1% SDS) and 1X in a high  
905 stringency wash buffer (0.5X SSC, 0.1% SDS) at 64°C, exposed to a Phosphor-Imaging  
906 screen for 12 - 24 hours, and imaged using a Typhoon scanner (see Fig. and Supp. Fig. 2,4).

## 907 **Flow cytometry**

908 These assays were performed over 12, 24, or 48 hours post-limitation for arginine, leucine, or  
909 growth in rich conditions; therefore cells grew to varying degrees of confluency, and initial  
910 seeding number was adjusted so that cells grown in nutrient rich conditions would be ~75%  
911 confluent at the time of collection for flow cytometry measurements. Cells in amino acid  
912 limited conditions were less confluent. Cells (HEK293T, HCT116, or HeLa) were detached  
913 from a 6 or 12 well plate using 0.05% trypsin + EDTA (Invitrogen). Trypsinization was  
914 quenched with DMEM + 10% FBS, and cells were pelleted by centrifugation at 125g for 5  
915 minutes. Pellets were resuspended in 500  $\mu$ L (for a 12 well plate well) to 1 mL (for a 6 well  
916 plate well) of PBS and the cell suspension was passed through a 0.35  $\mu$ m nylon mesh  
917 strainer-top tube (Corning) and kept at room temperature for flow cytometry analysis within 1  
918 hour of filtration. 10,000 – 30,000 events were collected for all experiments. YFP fluorescence  
919 measurements were log-transformed and the mean and standard deviation of all events was  
920 calculated from the population (see Fig. and Supp. Fig. 6).

## 921 **Puromycin incorporation assays**

922 75% confluent cells in a 6 cm plate were limited for arginine or leucine or grown in nutrient  
923 rich conditions for the desired time, followed by addition of puromycin (Sigma-Aldrich, P8833)  
924 to the culture medium at 10  $\mu$ g/mL for 5 minutes at 37°C. After exactly 5 minutes, cells were

925 washed once in ice-cold PBS and flash frozen in liquid nitrogen. Western blots or dot blots  
926 were performed to quantify puromycin incorporation into nascent polypeptide chains (see Fig.  
927 and Supp. Fig. 5).

### 928 **S-35 pulse assay**

929 75% confluent cells in a 6 well plate were limited for arginine or leucine or grown in nutrient  
930 rich conditions for the desired time, and then 50 uCi EasyTag <sup>35</sup>S-labeled methionine (Perkin  
931 Elmer) was added to cultures for 30 minutes at 37°C. Cells were lysed and collected as in  
932 “Western blotting” section. 25 µL lysate was spotted onto cellulose acetate filters (Whatman)  
933 and dried for 15 minutes. Filters were washed in a glass dish: 1X for 5 minutes in cold 5%  
934 TCA, 2X for 5 minutes in cold 10% TCA, 2X for 2 minutes in cold EtOH, and 1X for 2 minutes  
935 in cold acetone. Filters were then air dried for 15 minutes and transferred into a scintillation  
936 vial with 5 mLs scintillation fluid (ReadySolv-HP) for counting (see Supp. Fig. 5B).  
937 Notably, we could not deplete intracellular methionine pools by limitation for methionine, as  
938 this would significantly interfere with the amino acid limitation response measured in our  
939 experiments.

940 Problematically, we found that <sup>35</sup>S-methionine incorporation was higher after 3 hours of  
941 limitation for leucine than growth in rich conditions (Supp. Fig. 5B). This is likely an  
942 experimental artifact since the uptake rate and intracellular pool size of radiolabelled  
943 methionine can change significantly in response to amino acid limitation. We therefore used  
944 puromycin incorporation to quantitatively compare protein synthesis rates in subsequent  
945 experiments.

### 946 **Reverse transcription & qPCR**

947 Reverse transcription using a dT-20 primer (Invitrogen) or gene-specific primers was  
948 performed using Superscript III (Invitrogen) according to the manufacturer’s instructions.  
949 cDNA template was diluted in water and qPCR was performed in 10 µL reaction volumes in  
950 96 well plates, using the PowerUp SYBR Green PCR master mix according to the  
951 manufacturer’s instructions (Thermo Fisher Scientific) (see Supp. Fig. 6C,D). To calculate  
952 relative YFP reporter mRNA levels, the YFP C<sub>t</sub> value from qPCR analysis in each condition  
953 was normalized to the GAPDH C<sub>t</sub> value to find ΔC<sub>t</sub>, and then to the ΔC<sub>t</sub> for the arbitrary  
954 normalization sample (for Fig. 6C, YFP-WT in rich medium; for Fig. 6D, WT-CUA8 in rich  
955 medium) to find ΔΔC<sub>t</sub>, which was converted to a normalized mRNA level by taking 2<sup>-ΔΔC<sub>t</sub></sup>.

### 956 **Cell viability assays**

957 20,000 cells were seeded in 96 well plates (1 plate per assay time point, 5 technical replicates  
958 per plate) in amino acid limitation medium or rich medium. At desired time points, CellTiterGlo  
959 (CTG) assay (Promega) was performed according to the manufacturer’s instructions with the  
960 following modifications. Cells were lysed by adding 1 volume of CTG reagent and then  
961 transferred to an opaque black 96 well plate (Perkin Elmer catalog number 6005660) for  
962 luminescence reading. Luminescence was measured immediately on a TopCount instrument  
963 (Perkin Elmer) at 30°C. All viability measurements were normalized to an initial reading for  
964 each well taken 1.5 hours after seeding adherent cells (see Supp. Fig. 7).

## 965 **Databases utilized**

966 A subset of unique canonical transcripts used for mapping aligned ribosome profiling  
967 sequencing reads was defined based on the Gencode v24 database annotation file  
968 (`gencode.v24.annotation.gff3`). For each gene, only transcripts annotated as both CCDS  
969 in the APPRIS principal splice isoform database (Rodriguez et al., 2013) were included; of  
970 this subset, the transcript with the lowest CCDS number for each gene was selected to  
971 generate a unique set.  
972 tRNA gene numbers (see Supp. Fig. 1K) were obtained from the genomic tRNA database  
973 (`gtRNAdb`; `gtrnadb.uscs.edu/Hsapi19/`) (Chan and Lowe, 2016).

## 974 **Estimation of usage bias for pause-inducing arginine codons and GO analysis**

975 We employed a binomial probability distribution to estimate the probability, for each gene, of  
976 having the observed number of CGC and CGU codons given the genome-wide average  
977 arginine codon usage frequencies (see Supp. Fig. 1J). To avoid skew due to local GC bias in  
978 our analysis, we only considered sets of pause-inducing or non-pause-inducing arginine  
979 codons with equivalent GC content (CGC/CGU vs. CGA/CGG, respectively; “CGN codons”).  
980 We calculated the average expected number of pause-inducing codons for each gene as the  
981 mean of a theoretical binomial probability distribution ( $\mu$ );  $n \cdot p$ , where  $n$  is the total number of  
982 arginine codons and  $p$  is the average frequency of stall sites relative to other CGN codons ( $\sim$   
983 0.46). We also calculated the standard deviation of that theoretical binomial probability  
984 distribution ( $\sigma$ ) for each gene as the square root of  $n \cdot p \cdot (1-p)$ . To then calculate a Z-score, we  
985 subtracted  $\mu$  from the observed number of pause-inducing codons in that gene, and  
986 normalized by  $\sigma$ . When ranked, the resulting Z-scores represent bias towards (high Z-scores)  
987 or against (low Z-scores) the use of pause-inducing arginine codons to encode arginine in  
988 each gene (see Supp. Fig. 6E).

989 Gene ontology (GO) analysis to detect enrichment for GO terms in genes with biased usage  
990 of pause-inducing arginine codons was performed in R using the topGO library (Alexa and  
991 Rahnenfuhrer, 2016; Grossmann et al., 2007). Full code for generating the final figures in our  
992 paper starting from a ranked list of Z-scores (see Estimation of usage bias for pause-inducing  
993 codons section) is provided both as an interactive Jupyter notebook and as a static HTML file  
994 (Data S3). Fisher’s exact test was used to determine significance in enrichment of GO terms  
995 in genes with the highest and lowest 5% of Z-scores. GO terms with a false-discovery rate  
996 adjusted p-value of  $< 0.05$  were visualized using R scripts to plot generated by REVIGO  
997 (Supek et al., 2011) (see Supp. Fig. 6F).

998 **Figure Legends**

999 **Fig. 1**

1000 **Codon-specific ribosome pausing during limitation for arginine, but not leucine. (A-**

1001 **C) Changes in codon-specific ribosome density for HEK293T cells, HCT116, and HeLa**

1002 cells following 3 or 6 hours of arginine or leucine limitation, measured using ribosome

1003 profiling. Ribosome density for each codon is calculated relative to the mean footprint

1004 density for each coding sequence, and is averaged over all occurrences of each of the 61

1005 sense codons across detectably expressed transcripts. The difference in ribosome density

1006 between amino acid limited and rich conditions across a 150 nt window around each

1007 codon is either summed (A) or shown as such (B,C). Asterisk indicates satellite peaks

1008 reflecting collision of the trailing ribosome with the paused ribosome. (D) Usage frequency

1009 of Arg codons in the HEK293T, HCT116, and HeLa transcriptomes following 3 hours of

1010 arginine limitation (as shown in Supp. Fig. 1J) is compared to the summed change in

1011 ribosome density upon arginine limitation (as shown in A for HEK293T, and Supp. Fig. 1H

1012 for HCT116, HeLa).  $\rho$  indicates p-value of Spearman's rank coefficient,  $\rho$  (HEK293T;  $\rho = -$

1013 0.1,  $p = 0.9$ . HCT116;  $\rho = -0.1$ ,  $p = 0.8$ . HeLa;  $\rho = 0.03$ ,  $p = 1$ ). (E) Genomic copy number

1014 of the cognate tRNA for each Arg codon (Chan and Lowe, 2016) (as shown in Supp. Fig.

1015 1K) compared to the change in ribosome density upon arginine limitation (as shown in A

1016 for HEK293T, and Supp. Fig. 1H for HCT116, HeLa) (HEK293T;  $\rho = 0.58$ ,  $p = 0.2$ .

1017 HCT116;  $\rho = 0.76$ ,  $p = 0.08$ . HeLa;  $\rho = 0.27$ ,  $p = 0.6$ ).

1018 **Fig. 2**

1019 **Selective loss of cognate tRNA charging during arginine limitation. (A,B) tRNA**

1020 charging levels for 3 Arg tRNAs (A) and 4 Leu tRNAs (B) in HEK293T cells following 3

1021 hours of leucine or arginine limitation or growth in rich medium (calculated as described in

1022 Supp. Fig. 2A). tRNA anticodon and isotype are indicated above plots; error bars

1023 represent the standard error of the mean from three technical replicate experiments (see  
1024 Supp. Fig. 2A,B for representative northern blots and Supp. Fig. 1M for codon-tRNA  
1025 pairs). **(C)** Summed change in ribosome density at arginine and leucine codons for  
1026 HEK293T cells (Fig. 1A) plotted against the loss in charging for cognate tRNA (for those  
1027 measured) following arginine or leucine limitation, respectively.  $p$  indicates p-value of  
1028 Spearman's rank coefficient,  $\rho$  ( $\rho = 0.87$ ,  $p = 0.005$ ,  $N = 8$ ).

1029 **Fig. 3**

1030 **Divergent response of mTORC1 and GCN2 signaling pathways to arginine versus**  
1031 **leucine limitation. (A,B)** Representative western blots for phosphorylated and total levels  
1032 of the mTORC1 target p70 S6 kinase 1 (S6K) **(A)** or the GCN2 target eIF2 $\alpha$  **(B)** in  
1033 HEK293T cells after growth in rich medium or after 3, 6, or 12 hours of leucine or arginine  
1034 limitation. Bar graph shows the fraction of protein that is phosphorylated in each condition,  
1035 relative to the maximum; this normalized phosphorylation index was found first for each  
1036 sample on one blot and then averaged between blots from replicate experiments. Error  
1037 bars represent the standard error of the mean from three technical replicate experiments.  
1038 **(C,D)** Heatmap of log<sub>2</sub> fold-change (f.c.) in ribosome density for mRNA targets of  
1039 translational downregulation due to mTORC1 inhibition (Hsieh et al., 2012) **(C)** or of  
1040 transcriptional or translational upregulation due to GCN2 activation (Han et al., 2013) **(D)**,  
1041 following 3 hours of arginine or leucine limitation relative to growth in rich medium for  
1042 HEK293T, HCT116, and HeLa cells. Only targets with a log<sub>2</sub> fold change of < 0, for  
1043 mTORC1, or > 0, for ATF4/CHOP (transcription factor effectors downstream of GCN2  
1044 activation), upon amino acid limitation in all conditions and cell lines were considered. In  
1045 HEK293T cells, 46/63 (73%), in HCT116 cells, 14/63 (22%), and in HeLa cells, 45/63  
1046 (71%) of mTORC1 targets had higher ribosome density upon arginine than leucine  
1047 limitation. In HEK293T cells, 26/40 (65%), in HCT116 cells, 35/40 (88%), and in HeLa

1048 cells, 40/40 (100%) of GCN2 targets had higher ribosome density upon arginine than  
1049 leucine limitation. **(E,F)** Box plot of the  $\log_2$  fold change for each mTORC1 (E) or  
1050 ATF4/CHOP (F) target upon amino acid limitation (as shown in C,D). A two-sided  
1051 Wilcoxon signed rank test with continuity correction was performed to test the null  
1052 hypothesis that the median difference ( $\mu$ ) in the  $\log_2$  fold change for each target between  
1053 arginine and leucine limitation was equal to zero. The resulting p-value is shown above  
1054 each comparison and indicates whether there is a significant difference in the signaling  
1055 response to arginine versus leucine limitation. In HEK293T, HCT116, and HeLa cells, the  
1056 mTORC1 signaling response was 1.2-, 0.9-, and 1.1-fold higher during limitation for  
1057 arginine, respectively (E) and the GCN2 signaling response was 1-, 1.2, and 1.5-fold  
1058 higher during limitation for arginine, respectively (F).

1059 **Fig. 4**

1060 **Signaling through the mTORC1 and GCN2 pathways regulates the magnitude of**  
1061 **ribosome pausing during amino acid limitation. (A)** Representative western blots for  
1062 phosphorylated and total S6K in HEK293T cells after growth in rich medium or limitation  
1063 for leucine or arginine for 3 hours, in the presence or absence of 250 nM Torin1. Bar graph  
1064 shows fraction of protein that is phosphorylated, relative to rich medium; error bars  
1065 represent the standard error of the mean from three technical replicate experiments. **(B)**  
1066 Changes in codon-specific ribosome density in HEK293T cells expressing a fluorescent  
1067 reporter protein (hrGFP, as shown in C) after 3 hours of arginine or leucine limitation with  
1068 250 nM Torin1, relative to the maximum. **(C)** Representative western blots for  
1069 phosphorylated S6K, total S6K, and Flag epitope after growth in rich medium, or 3 hours  
1070 of leucine or arginine limitation in HEK293T cells stably expressing either hrGFP, Flag-  
1071 RagB-WT, or Flag-RagB-Q99L. RagB-Q99L is a dominant positive mutant of RagB, an  
1072 upstream regulator of mTORC1 (Sancak et al., 2008). Bar graphs show fraction of protein

1073 that is phosphorylated, relative to the maximum in the RagB-Q99L cell line; error bars  
1074 represent the standard error of the mean from three technical replicate experiments. **(D,E)**  
1075 Representative western blots for phosphorylated and total eIF2 $\alpha$  (D) or S6K (E) after  
1076 growth in rich medium, or 3 hours of leucine or arginine limitation in wild-type (WT) or  
1077 GCN2 knock-out (KO) HEK293T cells. Bar graphs show fraction of protein that is  
1078 phosphorylated, relative to the maximum in WT cells; error bars represent the standard  
1079 error of the mean from three technical replicate experiments. **(F)** Changes in codon-  
1080 specific ribosome density for WT HEK293T, hrGFP, Flag-RagB-Q99L, and GCN2 KO cell  
1081 lines following 6 hours of limitation for arginine or leucine.

1082 **Fig. 5**

1083 **Ribosome pausing reduces global protein synthesis rate during amino acid**

1084 **limitation. (A)** Global protein synthesis rate in HEK293T (WT) cells following 3 hours of  
1085 leucine or arginine limitation or treatment with 250 nM Torin1, relative to rich medium  
1086 (calculated as in Supp. Fig. 5A; see Supp. Fig. 5A for representative western blot images).

1087 Error bars represent the standard error of the mean for three technical replicate  
1088 measurements. **(B)** Global protein synthesis rate in HEK293T (WT) cells following 1.5, 3,  
1089 6, or 12 hours of leucine or arginine limitation, relative to rich medium (calculated as  
1090 described in Supp. Fig. 5G). Error bars represent the standard error of the mean for three

1091 technical replicate measurements. **(C)** Polysome profiles from WT cells following 6 hours  
1092 of leucine or arginine limitation or growth in rich medium. The main plot shows overlaid  
1093 polysome profiles from the disome (2 ribosome) peak to the end of the polysomes for all  
1094 conditions, the inset plots show the entire profile. All traces were aligned with respect to  
1095 the monosome peak height along the y-axis and position along the x-axis. **(D)** Global

1096 protein synthesis rate in WT or GCN2 KO cell lines following 3 hours of leucine or arginine  
1097 limitation, relative to rich medium (calculated as in Supp. Fig. 5G, see Supp. Fig. 5G for

1098 representative dot blot images). Error bars represent the standard error of the mean for  
1099 three technical replicate measurements. **(E)** Polysome profiles as described in C in the  
1100 GCN2 KO cell line following 6 hours of limitation for leucine or arginine or growth in rich  
1101 medium.

1102 **Fig. 6**

1103 **Ribosome pausing reduces protein expression from reporter mRNAs and induces**

1104 **premature termination of translation. (A)** Arginine and leucine YFP codon variant

1105 reporter design. A CMV promoter was used to drive expression of Flag-tagged yellow

1106 fluorescent protein (YFP) linked to a dihydrofolate reductase (DHFR) degron domain (DD)

1107 (Han et al., 2014), and YFP single codon variants were generated by swapping every

1108 arginine or leucine codon to each of the indicated synonymous codons. **(B-E)** YFP

1109 fluorescence in the HEK293T (WT) (B,D) or GCN2 KO cell lines (C,E) stably expressing

1110 the arginine (B-C) or leucine (D-E) YFP codon variant reporters following limitation for

1111 arginine or leucine with 10  $\mu$ M trimethoprim (+TMP) for 12, 24, or 48 hours, relative to rich

1112 medium +TMP. Flow cytometry was used to find the population mean YFP fluorescence

1113 for >10,000 events. **(F)** Premature termination reporter design. The reporter described in A

1114 was modified by the addition of a short linker of 8 tandem leucine CUA or UUG codons

1115 between YFP and DHFR. **(G)** YFP fluorescence in the WT or GCN2 KO cell lines stably

1116 expressing the UUG8, CUA4UUG4, CUA6UUG2, CUA8 reporters following limitation for

1117 arginine or leucine for 12, 24, or 48 hours without TMP. Flow cytometry was used to find

1118 the population mean YFP fluorescence for >10,000 events. **(H)** Western blot probed first

1119 for FLAG tag and then for GAPDH after growth in rich medium, or 48 hours of leucine or

1120 arginine limitation in the WT or GCN2 KO cell lines stably expressing the UUG8 or CUA8

1121 reporters. Lane 13 contains lysate from the YFP-WT reporter cell line (see Supp. Fig. 4A)



1122 for a full-length reporter protein size reference; GAPDH provides an intermediate size  
1123 reference.

1124

## 1125 **Supplementary Figure Legends**

### 1126 **Supp. Fig. 1**

#### 1127 **Codon-specific ribosome pausing during limitation for arginine, but not leucine. (A-**

1128 **C)** HEK293T cell polysome digestion by RNaseI (A,B) or MNase (C) into monosome-

1129 bound RNA footprints assessed by sucrose density gradient fractionation. For tests with

1130 RNaseI (A,B), high and low magnesium buffers were compared. Asterisk indicates

1131 monosome fraction. **(D)** Representative 15% TBE urea size selection gel from which

1132 monosome-bound RNA footprints were extracted from the total monosome sucrose

1133 density gradient fraction for library preparation. Dashed box indicates the footprint region

1134 excised. **(E-G)** Aligned read length distribution (E) and genome-wide read density profiles

1135 around annotated start (F) and stop codons (G) used to assess library quality for ribosome

1136 profiling experiments in HEK293T, HeLa, and HCT116 cells after arginine or leucine

1137 limitation for 3 hours or growth in nutrient rich media (see Fig. 1A-C). After 3' end trimming

1138 (see Methods), normalized read density is calculated relative to the mean footprint density

1139 for each coding sequence, and is averaged over all occurrences of the codon across

1140 detectably expressed transcripts. A region of the stop codon read density profile (G) is

1141 magnified in a second panel to clearly show three nucleotide periodicity. **(H)** Summed

1142 changes in codon-specific ribosome density for HCT116 and HeLa cells following 3 hours

1143 of arginine or leucine limitation, measured using ribosome profiling (calculated as

1144 described in Fig. 1A). **(I)** Intracellular arginine, isoleucine, leucine, and serine levels in

1145 HEK293T cells following limitation for arginine or leucine for 3 hours, relative to rich

1146 medium measured by liquid chromatography tandem mass spectrometry (LC-MS/MS).

1147 Error bars represent the standard error of the mean from three technical replicate  
1148 measurements. Intracellular leucine level was below the detection limit (n.d.) upon its  
1149 limitation. **(J)** Usage frequencies for Arg and Leu codons in the transcriptome in HEK293T,  
1150 HCT116, and HeLa cells following 3 hours of limitation for leucine or arginine, or growth in  
1151 rich conditions. **(K)** Genomic copy numbers of all Arg and Leu isoacceptor tRNAs (Chan  
1152 and Lowe, 2016). **(L)** Arg and Leu codons matched with their cognate tRNA(s). Decoding  
1153 by multiple tRNAs is indicated with a slash, I = inosine. **(M)** Usage frequency of Leu  
1154 codons in the HEK293T, HCT116, and HeLa transcriptomes following 3 hours of leucine  
1155 limitation (as shown in J) compared to the summed change in ribosome density upon  
1156 leucine limitation (as shown in Fig. 1A and H).  $\rho$  indicates  $\rho$ -value of Spearman's rank  
1157 coefficient,  $\rho$  (HEK293T;  $\rho = -0.6$ ,  $p = 0.2$ . HCT116;  $\rho = 0.03$ ,  $p = 1$ . HeLa;  $\rho = -0.37$ ,  $p =$   
1158  $0.5$ ). **(N)** Genomic copy number of cognate tRNA for each Leu codon (as shown in K)  
1159 compared to the change in ribosome density upon leucine limitation (as shown in Fig. 1A  
1160 and H) (HEK293T;  $\rho = -0.03$ ,  $p = 0.96$ . HCT116;  $\rho = 0.4$ ,  $p = 0.4$ . HeLa;  $\rho = 0$ ,  $p = 1$ ).

## 1161 **Supp. Fig. 2**

### 1162 **Selective loss of cognate tRNA charging during arginine limitation. (A-C)**

1163 Representative northern blots for determination of Arg and Leu tRNA charging levels (as  
1164 shown in Fig. 2) in HEK293T (A,B) cells or HCT116 cells (C) following 3 hours of limitation  
1165 for arginine or leucine or growth in rich medium. A control deacylated total RNA sample is  
1166 used to identify uncharged tRNA species. tRNA probe is indicated below each blot. Note  
1167 that two charged and uncharged species of tRNA<sup>Arg</sup><sub>ACG</sub> are detected in both cell lines, likely  
1168 due to covalent modification of this tRNA. Absolute charging level was calculated by  
1169 dividing the intensity of the charged band(s) by the sum of all band intensities. There is a  
1170 low level of cross-hybridization between the TAG and AAG probes, as we could not design  
1171 unique probes for these highly homologous tRNAs (see Methods for probe design details).

1172 **Supp. Fig. 3**

1173 **Divergent response of mTORC1 and GCN2 signaling pathways to arginine versus**

1174 **leucine limitation. (A,B)** Representative western blots for phosphorylated and total levels

1175 of the S6K target, RPS6, in HEK293T cells after growth in rich medium or limitation for

1176 leucine or arginine for 3 hours in the presence or absence (n.t.) of 250 nM Torin1 (A) or

1177 after growth of three replicates in rich medium, limitation for leucine or arginine for 3, 6 or

1178 12 hours, or limitation for all amino acids for 6 hours (B). Bar graphs show the fraction of

1179 protein that is phosphorylated in each condition, relative to rich medium; error bars

1180 represent the standard error of the mean from three technical replicate experiments. **(C,D)**

1181 Heatmap of log<sub>2</sub> fold-changes (f.c.) in ribosome density for mRNA targets of translational

1182 downregulation due to mTORC1 inhibition (Hsieh et al., 2012) (C) or transcriptional or

1183 translational upregulation due to GCN2 activation (Han et al., 2013) (D) following 3 or 6

1184 hours of arginine or leucine limitation, relative to rich medium, in HEK293T cells. Only

1185 targets with a log<sub>2</sub> fold change of <0, for mTORC1, or >0, for ATF4/CHOP (the

1186 transcription factor effectors downstream of GCN2 activation), in all conditions were

1187 considered. At 3 hours, 43/73 (59%), and at 6 hours, 47/73 (64%) of mTORC1 targets had

1188 higher ribosome density upon arginine than leucine limitation. At 3 hours, 67/87 (77%),

1189 and at 6 hours, 77/87 (89%) of ATF4/CHOP targets had higher ribosome density upon

1190 arginine than leucine limitation. **(E,F)** Box plot of the log<sub>2</sub> fold change for each mTORC1

1191 (E) or GCN2 (F) target upon amino acid limitation (as shown in C,D). A two-sided Wilcoxon

1192 signed rank test with continuity correction ( $\mu = 0$ ) was performed (described in Fig. 3E,F

1193 legend). The resulting p-value is shown above the data for each comparison. After 3 hours

1194 versus 6 hours of limitation for arginine or leucine, the mTORC1 signaling response was

1195 1.3- or 1.4-fold higher during arginine limitation, respectively (E) and the GCN2 signaling

1196 response was 1- or 1.1-fold higher during arginine limitation, respectively (F). **(G)** Box plot

1197 of the difference in the log<sub>2</sub> fold change between each mTORC1 or GCN2 target following  
1198 3 hours of limitation for arginine versus leucine in HEK293T, HCT116, and HeLa cells.

1199 **Supp. Fig. 4**

1200 **Signaling through the mTORC1 and GCN2 pathways regulates the magnitude of**

1201 **ribosome pausing during amino acid limitation. (A)** tRNA charging levels for 2 Arg

1202 tRNAs and 1 Leu tRNA in HEK293T cells following 3 hours of leucine or arginine limitation

1203 or growth in rich medium, in the presence or absence of 250 nM Torin1 (calculated as

1204 described in Supp. Fig. 2A). Error bars represent the standard error of the mean from

1205 three technical replicate experiments. **(B)** Summed changes in codon-specific ribosome

1206 density for HEK293T cells expressing the fluorescent reporter protein hrGFP (Fig. 4C)

1207 following 3 hours of limitation for arginine or leucine with 250 nM Torin1, relative to rich

1208 medium. **(C)** tRNA charging levels for 3 Arg tRNAs and 4 Leu tRNAs in HEK293T cells

1209 expressing hrGFP, RagB-WT, or RagB-Q99L (as shown in Fig. 4C) following limitation for

1210 leucine or arginine for 3 hours or growth in rich medium. Error bars represent the standard

1211 error of the mean from three technical replicate experiments. **(D)** Changes in codon-

1212 specific ribosome density for the hrGFP, RagB-WT, and RagB-Q99L cell lines following

1213 limitation for leucine or arginine for 3 hours, relative to rich medium. Inset plot series

1214 shows magnified ribosome pausing around leucine codons. **(E)** tRNA charging levels for 1

1215 Arg tRNA and 1 Leu tRNA in the WT, hrGFP, RagB-Q99L, or GCN2 KO cell lines (see Fig.

1216 4D,E; Supp. Fig. 4G) following limitation for leucine or arginine for 3 hours or growth in rich

1217 medium. **(F)** Overlaid summed changes in codon-specific ribosome density for the WT,

1218 hrGFP, RagB-Q99L, and GCN2 KO cell lines following 6 hours of arginine or leucine

1219 limitation, relative to rich medium. **(G)** Representative western blots for GCN2 and GAPDH

1220 proteins in the WT and GCN2 KO cell lines in 3 clonal replicate GCN2 KO cell lines to

1221 verify complete protein knockout. **(H)** tRNA charging levels for 1 Arg tRNA and 1 Leu tRNA

1222 in the hrGFP cell line in the presence or absence of 250 nM Torin1, the RagB-WT and the  
1223 RagB-Q99L cell line after treatment for <1 minute in ice-cold PBS with 100 µg/mL  
1224 cycloheximide, following limitation for leucine or arginine for 3 hours or growth in rich  
1225 medium.

1226 **Supp. Fig. 5**

1227 **Ribosome pausing reduces global protein synthesis rate during amino acid**

1228 **limitation. (A)** Representative western blots for puromycin and S6K in HEK293T (WT)

1229 and HCT116 cells given a brief pulse of 10 µg/mL puromycin (or no pulse) following 3

1230 hours of leucine or arginine limitation, treatment with 250 nM Torin1, or growth in rich

1231 medium. To quantify global protein synthesis rate, the total puromycin signal is integrated

1232 from each lane and normalized to a western blot for total S6K protein. Bar graph shows

1233 puromycin incorporation relative to rich medium; error bars represent the standard error of

1234 the mean from three technical replicate experiments. **(B)** <sup>35</sup>S-methionine incorporation into

1235 protein in the hrGFP cell line following 3 hours of leucine or arginine limitation, relative to

1236 rich medium; error bars represent the standard error of the mean from three technical

1237 replicate experiments. **(C)** Polysome profiles measured by sucrose density gradient

1238 fractionation of polysomes extracted from the hrGFP and RagB-Q99L cell lines following 6

1239 hours of arginine or leucine limitation or growth in rich medium. The main plot shows

1240 overlaid polysome profiles from the disome (2 ribosome) peak to the end of the polysomes

1241 for all conditions, the inset plots show the entire profile. All traces were aligned with

1242 respect to the monosome peak height along the y-axis and position along the x-axis. Bar

1243 graph shows the relative area in the polysome fraction (2+ ribosomes) to the monosome

1244 fraction (1 ribosome) (see Methods for details of calculation). **(D)** Representative western

1245 blots for EEF2K and GAPDH in WT and 3 clonal replicate EEF2K KO cell lines to verify

1246 complete protein knockout. **(E)** Representative western blots for phosphorylated and total

1247 EEF2 in WT and EEF2K KO cell lines following 3 hours of growth in rich medium, leucine  
1248 limitation, or arginine limitation. **(F)** Global protein synthesis rate in the WT (same data as  
1249 Fig. 5D) or EEF2K KO cell lines following 3 hours of leucine or arginine limitation, relative  
1250 to rich medium (calculated as described in G). Error bars represent the standard error of  
1251 the mean for three technical replicate measurements. **(G)** Representative dot blots for  
1252 puromycin and GAPDH in WT cells and the GCN2 KO cell line following 3 hours of leucine  
1253 or arginine limitation or growth in rich medium. To quantify global protein synthesis rate,  
1254 the total puromycin signal is integrated for each dot and normalized to the total GAPDH  
1255 signal.

1256 **Supp. Fig. 6**

1257 **Ribosome pausing reduces protein expression from reporter mRNAs and induces**

1258 **premature termination of translation. (A-C)** YFP codon variant reporter fluorescence

1259 measurements across multiple time points, cell lines, and reporter constructs. In all plots,

1260 flow cytometry was used to find the population mean YFP fluorescence from >10,000

1261 events; error bars represent the standard error of the mean from three technical replicate

1262 experiments. **(A)** YFP fluorescence in the presence or absence of 10  $\mu$ M of the reporter

1263 stabilizing ligand trimethoprim (+/-TMP) in HEK293T cells stably expressing the YFP-CGC

1264 (YFP-WT) reporter, following 24 or 38 hours of arginine or leucine limitation or growth in

1265 rich medium. **(B)** YFP fluorescence in the HEK293T cells stably expressing the arginine or

1266 leucine YFP codon variant reporters following limitation for arginine or leucine with 10  $\mu$ M

1267 trimethoprim (+TMP) for 24 hours, relative to rich medium +TMP. **(C)** YFP fluorescence in

1268 the HCT116, HeLa, and HEK293T cell lines stably expressing the YFP-CGC and -CGG

1269 reporters, following limitation for arginine, leucine or serum +TMP for 12, 24, or 48 hours,

1270 relative to rich medium +TMP. Unless otherwise indicated, the reporter was introduced by

1271 lentiviral transduction (as in Fig. 6A-D, Supp. Fig. 6A,B). In the HEK293T and HCT116 cell

1272 lines, the YFP reporter constructs were also introduced by homologous recombination at  
1273 the AAVS1 locus via CRISPR and contained alternative UTR and promoter elements (see  
1274 Methods section under Plasmid construction for details). **(D)** YFP-CGC and -CGG reporter  
1275 mRNA levels introduced at the AAVS1 locus in HEK293T cells following 24 hours of  
1276 limitation for leucine or arginine in the presence or absence of TMP, relative to rich  
1277 medium +TMP (see Methods section for details of calculation). From left to right, the data  
1278 is displayed in a series of plots 1) without further normalization, 2) normalized to the rich  
1279 condition for each YFP variant, and 3) as the ratio of the YFP-CGG variant to the YFP-  
1280 CGC variant in each condition. Error bars represent the standard error of the mean for  
1281 three technical replicate experiments. **(E)** CUA8 and UUG8 reporter mRNA levels in the  
1282 WT and GCN2 KO cell lines following 48 hours of limitation for leucine or arginine –TMP,  
1283 relative to rich medium –TMP (see Methods section for details of calculation). Error bars  
1284 represent the standard error of the mean for three technical replicate experiments. **(F)**  
1285 Distribution of pause-inducing arginine codons usage bias in endogenous genes (see  
1286 Methods section for details). A histogram of Z-scores is shown for all coding sequences;  
1287 low Z-scores represent bias against usage of pause-inducing codons to encode arginine,  
1288 and high Z-scores represent bias in favor of their usage. Z-scores range from -4.7 to 8.4.  
1289 **(F)** Visualization of biological process (BP) or cellular component (CC) gene ontology (GO)  
1290 categories enriched in genes with bias against (left plot, BP terms enriched in lowest Z-  
1291 scores) or in favor of (right plot, CC terms enriched in highest Z-scores) usage of pause-  
1292 inducing codons to encode arginine using topGO (Alexa and Rahnenfuhrer, 2016;  
1293 Grossmann et al., 2007) and REVIGO (Supek et al., 2011) (see Methods section for  
1294 details). Each bubble represents a significantly enriched GO term; color represents  $\log_{10}$  of  
1295 the false-discovery rate adjusted p-value, and size scales with the number of genes  
1296 associated with that term.

1297 **Supp. Fig. 7**

1298 **Ribosome pausing is linked to cell viability loss. (A)** Cell viability in HEK293T cells or  
1299 the GCN2 KO cell line following 1 to 13 days of arginine or leucine limitation, or growth in  
1300 rich medium. The luminescence-based CellTiterGlo assay was used to find total cellular  
1301 ATP content, which was normalized to the value on day 0; measurements are plotted on a  
1302 log<sub>2</sub> scaled y-axis. Error bars represent the standard error of the mean from five technical  
1303 replicate measurements. Both cell lines reached confluency in the rich medium condition  
1304 after 4 days.

1305 **Acknowledgments**

1306 We thank B. Zid, C. Chidley, T. Pan, A. Murray, V. Denic, V. Mootha, and members of the  
1307 O'Shea lab for helpful discussions. We thank C. Chidley, J. Piechura, and J. Darnell for  
1308 comments on the manuscript. We thank C. Shoemaker for reagents and advice for  
1309 CRISPR/Cas9 genome editing in human cell lines, and K. Han for reagents used to build  
1310 the YFP codon variant protein synthesis reporters. From the FAS Division of Science,  
1311 Harvard Core Facilities we thank C. Daly for high-throughput sequencing data collection  
1312 and K. Chatman for LC-MS/MS data collection. The high-throughput sequencing data  
1313 analysis in this paper was run on the Odyssey cluster supported by the FAS Division of  
1314 Science, Research Computing Group at Harvard University. This research was supported  
1315 by the National Institute of General Medical Sciences of the National Institutes of Health  
1316 under award numbers, R00GM107113 and R35GM119835 (A.R.S.). EKO is an  
1317 Investigator of the Howard Hughes Medical Institute. The authors declare no competing  
1318 interests.

1319 **Author Contributions**

1320 Conceptualization, A.M.D., A.R.S., and E.K.O.; Methodology, A.M.D and A.R.S.; Formal  
1321 Analysis, A.M.D. and A.R.S.; Investigation, A.M.D. and A.R.S.; Writing – Original Draft,  
1322 A.M.D., A.R.S., and E.K.O.; Writing – Review & Editing, A.M.D., A.R.S., and E.K.O;  
1323 Funding Acquisition, A.R.S. and E.K.O.; Supervision, A.R.S. and E.K.O.

1324



## 1325 **References**

- 1326 Alexa, A., and Rahnenfuhrer, J. (2016). topGO: Enrichment Analysis for Gene Ontology.
- 1327 Andreev, D.E., O'Connor, P.B., Fahey, C., Kenny, E.M., Terenin, I.M., Dmitriev, S.E., Cormican,  
1328 P., Morris, D.W., Shatsky, I.N., and Baranov, P.V. (2015). Translation of 5' leaders is pervasive in  
1329 genes resistant to eIF2 repression. *ELife* e03971.
- 1330 Averous, J., Lambert-Langlais, S., Mesclon, F., Carraro, V., Parry, L., Jousse, C., Bruhat, A.,  
1331 Maurin, A.-C., Pierre, P., Proud, C.G., et al. (2016). GCN2 contributes to mTORC1 inhibition by  
1332 leucine deprivation through an ATF4 independent mechanism. *Sci. Rep.* 6, 27698.
- 1333 Berlanga, J.J., Santoyo, J., and De Haro, C. (1999). Characterization of a mammalian homolog of  
1334 the GCN2 eukaryotic initiation factor 2alpha kinase. *Eur. J. Biochem.* 265, 754–762.
- 1335 Boer, V.M., Amini, S., and Botstein, D. (2008). Influence of genotype and nutrition on survival and  
1336 metabolism of starving yeast. *Proc. Natl. Acad. Sci.* 105, 6930–6935.
- 1337 Brandman, O., and Hegde, R.S. (2016). Ribosome-associated protein quality control. *Nat. Struct.*  
1338 *Mol. Biol.* 23, 7–15.
- 1339 Bröer, S., and Bröer, A. (2017). Amino acid homeostasis and signalling in mammalian cells and  
1340 organisms. *Biochem. J.* 474, 1935–1963.
- 1341 Buskirk, A.R., and Green, R. (2017). Ribosome pausing, arrest and rescue in bacteria and  
1342 eukaryotes. *Philos. Trans. R. Soc. Lond. B. Biol. Sci.* 372.
- 1343 Buttgereit, F., and Brand, M.D. (1995). A hierarchy of ATP-consuming processes in mammalian  
1344 cells. *Biochem. J.* 312, 163–167.
- 1345 Castilho, B.A., Shanmugam, R., Silva, R.C., Ramesh, R., Himme, B.M., and Sattlegger, E. (2014).  
1346 Keeping the eIF2 alpha kinase Gcn2 in check. *Biochim. Biophys. Acta BBA - Mol. Cell Res.* 1843,  
1347 1948–1968.
- 1348 Cerbini, T., Funahashi, R., Luo, Y., Liu, C., Park, K., Rao, M., Malik, N., and Zou, J. (2015).  
1349 Transcription Activator-Like Effector Nuclease (TALEN)-Mediated CLYBL Targeting Enables  
1350 Enhanced Transgene Expression and One-Step Generation of Dual Reporter Human Induced  
1351 Pluripotent Stem Cell (iPSC) and Neural Stem Cell (NSC) Lines. *PLoS ONE* 10.
- 1352 Chan, P.P., and Lowe, T.M. (2016). GtRNADB 2.0: an expanded database of transfer RNA genes  
1353 identified in complete and draft genomes. *Nucleic Acids Res.* 44, D184–D189.
- 1354 Chantranupong, L., Scaria, S.M., Saxton, R.A., Gygi, M.P., Shen, K., Wyant, G.A., Wang, T.,  
1355 Harper, J.W., Gygi, S.P., and Sabatini, D.M. (2016). The CASTOR proteins are arginine sensors for  
1356 the mTORC1 pathway. *Cell* 165, 153–164.
- 1357 Chu, V.T., Weber, T., Wefers, B., Wurst, W., Sander, S., Rajewsky, K., and Kühn, R. (2015).  
1358 Increasing the efficiency of homology-directed repair for CRISPR-Cas9-induced precise gene  
1359 editing in mammalian cells. *Nat. Biotechnol.* 33, 543–548.
- 1360 Cong, L., Ran, F.A., Cox, D., Lin, S., Barretto, R., Habib, N., Hsu, P.D., Wu, X., Jiang, W.,  
1361 Marraffini, L.A., et al. (2013). Multiplex Genome Engineering Using CRISPR/Cas Systems.  
1362 *Science* 339, 819–823.

- 1363 Dittmar, K.A., Sørensen, M.A., Elf, J., Ehrenberg, M., and Pan, T. (2005). Selective charging of  
1364 tRNA isoacceptors induced by amino-acid starvation. *EMBO Rep.* *6*, 151–157.
- 1365 Doench, J.G., Fusi, N., Sullender, M., Hegde, M., Vaimberg, E.W., Donovan, K.F., Smith, I.,  
1366 Tothova, Z., Wilen, C., Orchard, R., et al. (2016). Optimized sgRNA design to maximize activity  
1367 and minimize off-target effects of CRISPR-Cas9. *Nat. Biotechnol.* *34*, 184–191.
- 1368 Dong, J., Qiu, H., Garcia-Barrio, M., Anderson, J., and Hinnebusch, A.G. (2000). Uncharged tRNA  
1369 activates GCN2 by displacing the protein kinase moiety from a bipartite tRNA-binding domain.  
1370 *Mol. Cell* *6*, 269–279.
- 1371 Drummond, D.A., and Wilke, C.O. (2008). Mistranslation-Induced Protein Misfolding as a  
1372 Dominant Constraint on Coding-Sequence Evolution. *Cell* *134*, 341–352.
- 1373 Dunn, J.G., Foo, C.K., Belletier, N.G., Gavis, E.R., and Weissman, J.S. (2013). Ribosome profiling  
1374 reveals pervasive and regulated stop codon readthrough in *Drosophila melanogaster*. *ELife* *2*.
- 1375 Edgar, R.C. (2004). MUSCLE: multiple sequence alignment with high accuracy and high  
1376 throughput. *Nucleic Acids Res.* *32*, 1792–1797.
- 1377 Edri, S., and Tuller, T. (2014). Quantifying the Effect of Ribosomal Density on mRNA Stability.  
1378 *PLOS ONE* *9*, e102308.
- 1379 Efeyan, A., Zoncu, R., Chang, S., Gumper, I., Snitkin, H., Wolfson, R.L., Kirak, O., Sabatini, D.D.,  
1380 and Sabatini, D.M. (2013). Regulation of mTORC1 by the Rag GTPases is necessary for neonatal  
1381 autophagy and survival. *Nature* *493*, 679–683.
- 1382 Elf, J., Nilsson, D., Tenson, T., and Ehrenberg, M. (2003). Selective charging of tRNA isoacceptors  
1383 explains patterns of codon usage. *Science* *300*, 1718–1722.
- 1384 Ferrin, M.A., and Subramaniam, A.R. (2017). Kinetic modeling predicts a stimulatory role for  
1385 ribosome collisions at elongation stall sites in bacteria. *ELife* *6*, e23629.
- 1386 Galtier, N., Roux, C., Rousselle, M., Romiguier, J., Figuet, E., Glemin, S., Bierne, N., and Duret, L.  
1387 (2017). Codon usage bias in animals: disentangling the effects of natural selection, effective  
1388 population size and GC-biased gene conversion. *BioRxiv* 184283.
- 1389 Gingold, H., Tehler, D., Christoffersen, N.R., Nielsen, M.M., Asmar, F., Kooistra, S.M.,  
1390 Christophersen, N.S., Christensen, L.L., Borre, M., Sørensen, K.D., et al. (2014). A Dual Program  
1391 for Translation Regulation in Cellular Proliferation and Differentiation. *Cell* *158*, 1281–1292.
- 1392 Goodarzi, H., Nguyen, H.C.B., Zhang, S., Dill, B.D., Molina, H., and Tavazoie, S.F. (2016).  
1393 Modulated Expression of Specific tRNAs Drives Gene Expression and Cancer Progression. *Cell*  
1394 *165*, 1416–1427.
- 1395 Grossmann, S., Bauer, S., Robinson, P.N., and Vingron, M. (2007). Improved detection of  
1396 overrepresentation of Gene-Ontology annotations with parent child analysis. *Bioinform. Oxf.*  
1397 *Engl.* *23*, 3024–3031.
- 1398 Guydosh, N.R., and Green, R. (2014). Dom34 Rescues Ribosomes in 3' Untranslated Regions. *Cell*  
1399 *156*, 950–962.

- 1400 Han, J., Back, S.H., Hur, J., Lin, Y.-H., Gildersleeve, R., Shan, J., Yuan, C.L., Krokowski, D.,  
1401 Wang, S., Hatzoglou, M., et al. (2013). ER-stress-induced transcriptional regulation increases  
1402 protein synthesis leading to cell death. *Nat. Cell Biol.* *15*, 481–490.
- 1403 Han, K., Jaimovich, A., Dey, G., Ruggero, D., Meyuhas, O., Sonenberg, N., and Meyer, T. (2014).  
1404 Parallel measurement of dynamic changes in translation rates in single cells. *Nat. Methods* *11*, 86–  
1405 93.
- 1406 Hara, K., Yonezawa, K., Weng, Q.-P., Kozlowski, M.T., Belham, C., and Avruch, J. (1998). Amino  
1407 Acid Sufficiency and mTOR Regulate p70 S6 Kinase and eIF-4E BP1 through a Common Effector  
1408 Mechanism. *J. Biol. Chem.* *273*, 14484–14494.
- 1409 Harding, H.P., Novoa, I., Zhang, Y., Zeng, H., Wek, R., Schapira, M., and Ron, D. (2000).  
1410 Regulated Translation Initiation Controls Stress-Induced Gene Expression in Mammalian Cells.  
1411 *Mol. Cell* *6*, 1099–1108.
- 1412 Hattori, A., Tsunoda, M., Konuma, T., Kobayashi, M., Nagy, T., Glushka, J., Tayyari, F.,  
1413 McSkimming, D., Kannan, N., Tojo, A., et al. (2017). Cancer progression by reprogrammed BCAA  
1414 metabolism in myeloid leukemia. *Nature* *545*, 500–504.
- 1415 Hinnebusch, A.G., and Natarajan, K. (2002). Gcn4p, a Master Regulator of Gene Expression, Is  
1416 Controlled at Multiple Levels by Diverse Signals of Starvation and Stress. *Eukaryot. Cell* *1*, 22–32.
- 1417 Hosios, A.M., Hecht, V.C., Danai, L.V., Johnson, M.O., Rathmell, J.C., Steinhauser, M.L.,  
1418 Manalis, S.R., and Vander Heiden, M.G. (2016). Amino Acids Rather than Glucose Account for the  
1419 Majority of Cell Mass in Proliferating Mammalian Cells. *Dev. Cell* *36*, 540–549.
- 1420 Hsieh, A.C., Liu, Y., Edlind, M.P., Ingolia, N.T., Janes, M.R., Sher, A., Shi, E.Y., Stumpf, C.R.,  
1421 Christensen, C., Bonham, M.J., et al. (2012). The translational landscape of mTOR signalling steers  
1422 cancer initiation and metastasis. *Nature* *485*, 55–61.
- 1423 Ingolia, N.T., Ghaemmaghami, S., Newman, J.R.S., and Weissman, J.S. (2009). Genome-Wide  
1424 Analysis in Vivo of Translation with Nucleotide Resolution Using Ribosome Profiling. *Science*  
1425 *324*, 218–223.
- 1426 Ingolia, N.T., Lareau, L.F., and Weissman, J.S. (2011). Ribosome profiling of mouse embryonic  
1427 stem cells reveals the complexity and dynamics of mammalian proteomes. *Cell* *147*, 789–802.
- 1428 Ingolia, N.T., Brar, G.A., Rouskin, S., McGeachy, A.M., and Weissman, J.S. (2012). The ribosome  
1429 profiling strategy for monitoring translation in vivo by deep sequencing of ribosome-protected  
1430 mRNA fragments. *Nat. Protoc.* *7*, 1534–1550.
- 1431 Ishimura, R., Nagy, G., Dotu, I., Zhou, H., Yang, X.-L., Schimmel, P., Senju, S., Nishimura, Y.,  
1432 Chuang, J.H., and Ackerman, S.L. (2014). Ribosome stalling induced by mutation of a CNS-  
1433 specific tRNA causes neurodegeneration. *Science* *345*, 455–459.
- 1434 Ishimura, R., Nagy, G., Dotu, I., Chuang, J.H., and Ackerman, S.L. (2016). Activation of GCN2  
1435 kinase by ribosome stalling links translation elongation with translation initiation. *ELife* *5*, e14295.
- 1436 Iwamoto, M., Björklund, T., Lundberg, C., Kirik, D., and Wandless, T.J. (2010). A general  
1437 chemical method to regulate protein stability in the mammalian central nervous system. *Chem.*  
1438 *Biol.* *17*, 981–988.

- 1439 Jain, M., Nilsson, R., Sharma, S., Madhusudhan, N., Kitami, T., Souza, A.L., Kafri, R., Kirschner,  
1440 M.W., Clish, C.B., and Mootha, V.K. (2012). Metabolite Profiling Identifies a Key Role for  
1441 Glycine in Rapid Cancer Cell Proliferation. *Science* 336, 1040–1044.
- 1442 Jousse, C., Bruhat, A., Ferrara, M., and Fafournoux, P. (2000). Evidence for Multiple Signaling  
1443 Pathways in the Regulation of Gene Expression by Amino Acids in Human Cell Lines. *J. Nutr.* 130,  
1444 1555–1560.
- 1445 Kanaya, S., Yamada, Y., Kudo, Y., and Ikemura, T. (1999). Studies of codon usage and tRNA  
1446 genes of 18 unicellular organisms and quantification of *Bacillus subtilis* tRNAs: gene expression  
1447 level and species-specific diversity of codon usage based on multivariate analysis. *Gene* 238, 143–  
1448 155.
- 1449 Kimball, S.R. (2002). Regulation of Global and Specific mRNA Translation by Amino Acids. *J.*  
1450 *Nutr.* 132, 883–886.
- 1451 Kirchner, S., and Ignatova, Z. (2015). Emerging roles of tRNA in adaptive translation, signalling  
1452 dynamics and disease. *Nat. Rev. Genet.* 16, 98–112.
- 1453 Knott, S.R.V., Wagenblast, E., Khan, S., Kim, S.Y., Soto, M., Wagner, M., Turgeon, M.-O., Fish,  
1454 L., Erard, N., Gable, A.L., et al. (2018). Asparagine bioavailability governs metastasis in a model of  
1455 breast cancer. *Nature* 554, 378–381.
- 1456 Krall, A.S., Xu, S., Graeber, T.G., Braas, D., and Christofk, H.R. (2016). Asparagine promotes  
1457 cancer cell proliferation through use as an amino acid exchange factor. *Nat. Commun.* 7, 11457.
- 1458 Langmead, B., Trapnell, C., Pop, M., and Salzberg, S.L. (2009). Ultrafast and memory-efficient  
1459 alignment of short DNA sequences to the human genome. *Genome Biol.* 10, R25.
- 1460 Laplante, M., and Sabatini, D.M. (2013). Regulation of mTORC1 and its impact on gene expression  
1461 at a glance. *J. Cell Sci.* 126, 1713–1719.
- 1462 Leprivier, G., Remke, M., Rotblat, B., Dubuc, A., Mateo, A.-R.F., Kool, M., Agnihotri, S., El-  
1463 Nagggar, A., Yu, B., Somasekharan, S.P., et al. (2013). The eEF2 Kinase Confers Resistance to  
1464 Nutrient Deprivation by Blocking Translation Elongation. *Cell* 153, 1064–1079.
- 1465 Li, B., and Dewey, C.N. (2011). RSEM: accurate transcript quantification from RNA-Seq data with  
1466 or without a reference genome. *BMC Bioinformatics* 12, 323.
- 1467 Li, G.-W., Oh, E., and Weissman, J.S. (2012). The anti-Shine-Dalgarno sequence drives  
1468 translational pausing and codon choice in bacteria. *Nature* 484, 538–541.
- 1469 Lind, D.S. (2004). Arginine and Cancer. *J. Nutr.* 134, 2837S-2841S.
- 1470 Liu, Q., Chang, J.W., Wang, J., Kang, S.A., Thoreen, C.C., Markhard, A., Hur, W., Zhang, J., Sim,  
1471 T., Sabatini, D.M., et al. (2010). Discovery of 1-(4-(4-propionylpiperazin-1-yl)-3-  
1472 (trifluoromethyl)phenyl)-9-(quinolin-3-yl)benzo[h][1,6]naphthyridin-2(1H)-one as a highly potent,  
1473 selective mammalian target of rapamycin (mTOR) inhibitor for the treatment of cancer. *J. Med.*  
1474 *Chem.* 53, 7146–7155.
- 1475 Loayza-Puch, F., Rooijers, K., Buil, L.C.M., Zijlstra, J., F. Oude Vrielink, J., Lopes, R., Ugalde,  
1476 A.P., van Breugel, P., Hofland, I., Wesseling, J., et al. (2016a). Tumour-specific proline  
1477 vulnerability uncovered by differential ribosome codon reading. *Nature* 530, 490–494.

- 1478 Loayza-Puch, F., Rooijers, K., Buil, L.C.M., Zijlstra, J., F. Oude Vrielink, J., Lopes, R., Ugalde,  
1479 A.P., van Breugel, P., Hofland, I., Wesseling, J., et al. (2016b). Tumour-specific proline  
1480 vulnerability uncovered by differential ribosome codon reading. *Nature* *530*, 490–494.
- 1481 Love, M.I., Huber, W., and Anders, S. (2014). Moderated estimation of fold change and dispersion  
1482 for RNA-seq data with DESeq2. *Genome Biol.* *15*, 550.
- 1483 Lowe, T.M., and Eddy, S.R. (1997). tRNAscan-SE: a program for improved detection of transfer  
1484 RNA genes in genomic sequence. *Nucleic Acids Res.* *25*, 955–964.
- 1485 Ma, X.M., and Blenis, J. (2009). Molecular mechanisms of mTOR-mediated translational control.  
1486 *Nat. Rev. Mol. Cell Biol.* *10*, 307–318.
- 1487 Mali, P., Yang, L., Esvelt, K.M., Aach, J., Guell, M., DiCarlo, J.E., Norville, J.E., and Church,  
1488 G.M. (2013). RNA-Guided Human Genome Engineering via Cas9. *Science* *339*, 823–826.
- 1489 Martin, M. (2011). Cutadapt removes adapter sequences from high-throughput sequencing reads.  
1490 *EMBnet.Journal* *17*, 10–12.
- 1491 MGlinicy, N.J., and Ingolia, N.T. (2017). Transcriptome-wide measurement of translation by  
1492 ribosome profiling. *Methods* *126*, 112–129.
- 1493 Morris, S.M. (2007). Arginine Metabolism: Boundaries of Our Knowledge. *J. Nutr.* *137*, 1602S-  
1494 1609S.
- 1495 Nelson, D.M., Ye, X., Hall, C., Santos, H., Ma, T., Kao, G.D., Yen, T.J., Harper, J.W., and Adams,  
1496 P.D. (2002). Coupling of DNA Synthesis and Histone Synthesis in S Phase Independent of  
1497 Cyclin/cdk2 Activity. *Mol. Cell. Biol.* *22*, 7459–7472.
- 1498 Nofal, M., Zhang, K., Han, S., and Rabinowitz, J.D. (2017). mTOR Inhibition Restores Amino  
1499 Acid Balance in Cells Dependent on Catabolism of Extracellular Protein. *Mol. Cell* *67*, 936-946.e5.
- 1500 Oh, E., Becker, A.H., Sandikci, A., Huber, D., Chaba, R., Gloge, F., Nichols, R.J., Typas, A.,  
1501 Gross, C.A., Kramer, G., et al. (2011). Selective ribosome profiling reveals the co-translational  
1502 chaperone action of trigger factor in vivo. *Cell* *147*, 1295–1308.
- 1503 Park, Y., Reyna-Neyra, A., Philippe, L., and Thoreen, C.C. (2017). mTORC1 Balances Cellular  
1504 Amino Acid Supply with Demand for Protein Synthesis through Post-transcriptional Control of  
1505 ATF4. *Cell Rep.* *19*, 1083–1090.
- 1506 Perez, F., and Granger, B.E. (2007). IPython: A System for Interactive Scientific Computing.  
1507 *Comput. Sci. Eng.* *9*, 21–29.
- 1508 Possemato, R., Marks, K.M., Shaul, Y.D., Pacold, M.E., Kim, D., Birsoy, K., Sethumadhavan, S.,  
1509 Woo, H.-K., Jang, H.G., Jha, A.K., et al. (2011). Functional genomics reveal that the serine  
1510 synthesis pathway is essential in breast cancer. *Nature* *476*, 346–350.
- 1511 Presnyak, V., Alhusaini, N., Chen, Y.-H., Martin, S., Morris, N., Kline, N., Olson, S., Weinberg,  
1512 D., Baker, K.E., Graveley, B.R., et al. (2015). Codon optimality is a major determinant of mRNA  
1513 stability. *Cell* *160*, 1111–1124.

- 1514 Qian, K., Huang, C.-L., Chen, H., Blackbourn, L.W., Chen, Y., Cao, J., Yao, L., Sauvey, C., Du, Z.,  
1515 and Zhang, S.-C. (2014). A Simple and Efficient System for Regulating Gene Expression in Human  
1516 Pluripotent Stem Cells and Derivatives. *Stem Cells Dayt. Ohio* 32, 1230–1238.
- 1517 Qian, W., Yang, J.-R., Pearson, N.M., Maclean, C., and Zhang, J. (2012). Balanced Codon Usage  
1518 Optimizes Eukaryotic Translational Efficiency. *PLOS Genet.* 8, e1002603.
- 1519 Rabinovich, S., Adler, L., Yizhak, K., Sarver, A., Silberman, A., Agron, S., Stettner, N., Sun, Q.,  
1520 Brandis, A., Helbling, D., et al. (2015). Diversion of aspartate in ASS1-deficient tumours fosters de  
1521 novo pyrimidine synthesis. *Nature* 527, 379–383.
- 1522 Radhakrishnan, A., Chen, Y.-H., Martin, S., Alhusaini, N., Green, R., and Collier, J. (2016). The  
1523 DEAD-Box Protein Dhh1p Couples mRNA Decay and Translation by Monitoring Codon  
1524 Optimality. *Cell* 167, 122–132.
- 1525 Ran, F.A., Hsu, P.D., Wright, J., Agarwala, V., Scott, D.A., and Zhang, F. (2013). Genome  
1526 engineering using the CRISPR-Cas9 system. *Nat. Protoc.* 8, 2281–2308.
- 1527 Reid, D.W., Shenolikar, S., and Nicchitta, C.V. (2015). Simple and inexpensive ribosome profiling  
1528 analysis of mRNA translation. *Methods San Diego Calif* 91, 69–74.
- 1529 Rodriguez, J.M., Maietta, P., Ezkurdia, I., Pietrelli, A., Wesselink, J.-J., Lopez, G., Valencia, A.,  
1530 and Tress, M.L. (2013). APPRIS: annotation of principal and alternative splice isoforms. *Nucleic  
1531 Acids Res.* 41, D110–D117.
- 1532 Saikia, M., Wang, X., Mao, Y., Wan, J., Pan, T., and Qian, S.-B. (2016). Codon optimality controls  
1533 differential mRNA translation during amino acid starvation. *RNA* 22, 1719–1727.
- 1534 Sancak, Y., Peterson, T.R., Shaul, Y.D., Lindquist, R.A., Thoreen, C.C., Bar-Peled, L., and  
1535 Sabatini, D.M. (2008). The Rag GTPases Bind Raptor and Mediate Amino Acid Signaling to  
1536 mTORC1. *Science* 320, 1496–1501.
- 1537 Saxton, R.A., and Sabatini, D.M. (2017). mTOR Signaling in Growth, Metabolism, and Disease.  
1538 *Cell* 168, 960–976.
- 1539 Schmidt, E.K., Clavarino, G., Ceppi, M., and Pierre, P. (2009). SUNSET, a nonradioactive method  
1540 to monitor protein synthesis. *Nat. Methods* 6, 275–277.
- 1541 Scott, L., Lamb, J., Smith, S., and Wheatley, D.N. (2000). Single amino acid (arginine) deprivation:  
1542 rapid and selective death of cultured transformed and malignant cells. *Br. J. Cancer* 83, 800–810.
- 1543 Shoemaker, C.J., and Green, R. (2012). Translation drives mRNA quality control. *Nat. Struct. Mol.  
1544 Biol.* 19, 594–601.
- 1545 Simms, C.L., Yan, L.L., and Zaher, H.S. (2017). Ribosome Collision Is Critical for Quality Control  
1546 during No-Go Decay. *Mol. Cell* 68, 361–373.
- 1547 Sonenberg, N., and Hinnebusch, A.G. (2009). Regulation of Translation Initiation in Eukaryotes:  
1548 Mechanisms and Biological Targets. *Cell* 136, 731–745.
- 1549 Sood, R., Porter, A.C., Olsen, D.A., Cavener, D.R., and Wek, R.C. (2000). A mammalian  
1550 homologue of GCN2 protein kinase important for translational control by phosphorylation of  
1551 eukaryotic initiation factor-2alpha. *Genetics* 154, 787–801.

- 1552 Stewart, S.A., Dykxhoorn, D.M., Palliser, D., Mizuno, H., Yu, E.Y., An, D.S., Sabatini, D.M.,  
1553 Chen, I.S.Y., Hahn, W.C., Sharp, P.A., et al. (2003). Lentivirus-delivered stable gene silencing by  
1554 RNAi in primary cells. *RNA* 9, 493–501.
- 1555 Subramaniam, A.R., Pan, T., and Cluzel, P. (2013a). Environmental perturbations lift the  
1556 degeneracy of the genetic code to regulate protein levels in bacteria. *Proc. Natl. Acad. Sci.* 110,  
1557 2419–2424.
- 1558 Subramaniam, A.R., DeLoughery, A., Bradshaw, N., Chen, Y., O’Shea, E., Losick, R., and Chai, Y.  
1559 (2013b). A serine sensor for multicellularity in a bacterium. *ELife* 2, e01501.
- 1560 Subramaniam, A.R., Zid, B.M., and O’Shea, E.K. (2014). An Integrated Approach Reveals  
1561 Regulatory Controls on Bacterial Translation Elongation. *Cell* 159, 1200–1211.
- 1562 Supek, F., Bošnjak, M., Škunca, N., and Šmuc, T. (2011). REVIGO Summarizes and Visualizes  
1563 Long Lists of Gene Ontology Terms. *PLoS One* 6, e21800.
- 1564 Tang, X., Keenan, M.M., Wu, J., Lin, C.-A., Dubois, L., Thompson, J.W., Freedland, S.J., Murphy,  
1565 S.K., and Chi, J.-T. (2015). Comprehensive Profiling of Amino Acid Response Uncovers Unique  
1566 Methionine-Deprived Response Dependent on Intact Creatine Biosynthesis. *PLoS Genet* 11,  
1567 e1005158.
- 1568 Thoreen, C.C., Kang, S.A., Chang, J.W., Liu, Q., Zhang, J., Gao, Y., Reichling, L.J., Sim, T.,  
1569 Sabatini, D.M., and Gray, N.S. (2009). An ATP-competitive Mammalian Target of Rapamycin  
1570 Inhibitor Reveals Rapamycin-resistant Functions of mTORC1. *J. Biol. Chem.* 284, 8023–8032.
- 1571 Thoreen, C.C., Chantranupong, L., Keys, H.R., Wang, T., Gray, N.S., and Sabatini, D.M. (2012). A  
1572 unifying model for mTORC1-mediated regulation of mRNA translation. *Nature* 485, 109–113.
- 1573 Varshney, U., Lee, C.P., and RajBhandary, U.L. (1991). Direct analysis of aminoacylation levels of  
1574 tRNAs in vivo. Application to studying recognition of Escherichia coli initiator tRNA mutants by  
1575 glutamyl-tRNA synthetase. *J. Biol. Chem.* 266, 24712–24718.
- 1576 Wang, S., Tsun, Z.-Y., Wolfson, R.L., Shen, K., Wyant, G.A., Plovonich, M.E., Yuan, E.D., Jones,  
1577 T.D., Chantranupong, L., Comb, W., et al. (2015). Lysosomal amino acid transporter SLC38A9  
1578 signals arginine sufficiency to mTORC1. *Science* 347, 188–194.
- 1579 Wise, D.R., and Thompson, C.B. (2010). Glutamine addiction: a new therapeutic target in cancer.  
1580 *Trends Biochem. Sci.* 35, 427–433.
- 1581 Wolfson, R.L., Chantranupong, L., Saxton, R.A., Shen, K., Scaria, S.M., Cantor, J.R., and Sabatini,  
1582 D.M. (2016). Sestrin2 is a leucine sensor for the mTORC1 pathway. *Science* 351, 43–48.
- 1583 Xiao, F., Huang, Z., Li, H., Yu, J., Wang, C., Chen, S., Meng, Q., Cheng, Y., Gao, X., Li, J., et al.  
1584 (2011). Leucine Deprivation Increases Hepatic Insulin Sensitivity via GCN2/mTOR/S6K1 and  
1585 AMPK Pathways. *Diabetes* 60, 746–756.
- 1586 Ye, J., Kumanova, M., Hart, L.S., Sloane, K., Zhang, H., De Panis, D.N., Bobrovnikova-Marjon,  
1587 E., Diehl, J.A., Ron, D., and Koumenis, C. (2010). The GCN2-ATF4 pathway is critical for tumour  
1588 cell survival and proliferation in response to nutrient deprivation. *EMBO J.* 29, 2082–2096.
- 1589 Zaborske, J.M., Wu, X., Wek, R.C., and Pan, T. (2010). Selective control of amino acid metabolism  
1590 by the GCN2 eIF2 kinase pathway in *Saccharomyces cerevisiae*. *BMC Biochem.* 11, 29.

1591 Zhang, P., McGrath, B.C., Reinert, J., Olsen, D.S., Lei, L., Gill, S., Wek, S.A., Vattam, K.M., Wek,  
1592 R.C., Kimball, S.R., et al. (2002). The GCN2 eIF2 $\alpha$  Kinase Is Required for Adaptation to Amino  
1593 Acid Deprivation in Mice. *Mol. Cell. Biol.* 22, 6681–6688.

1594



# FIGURE 1

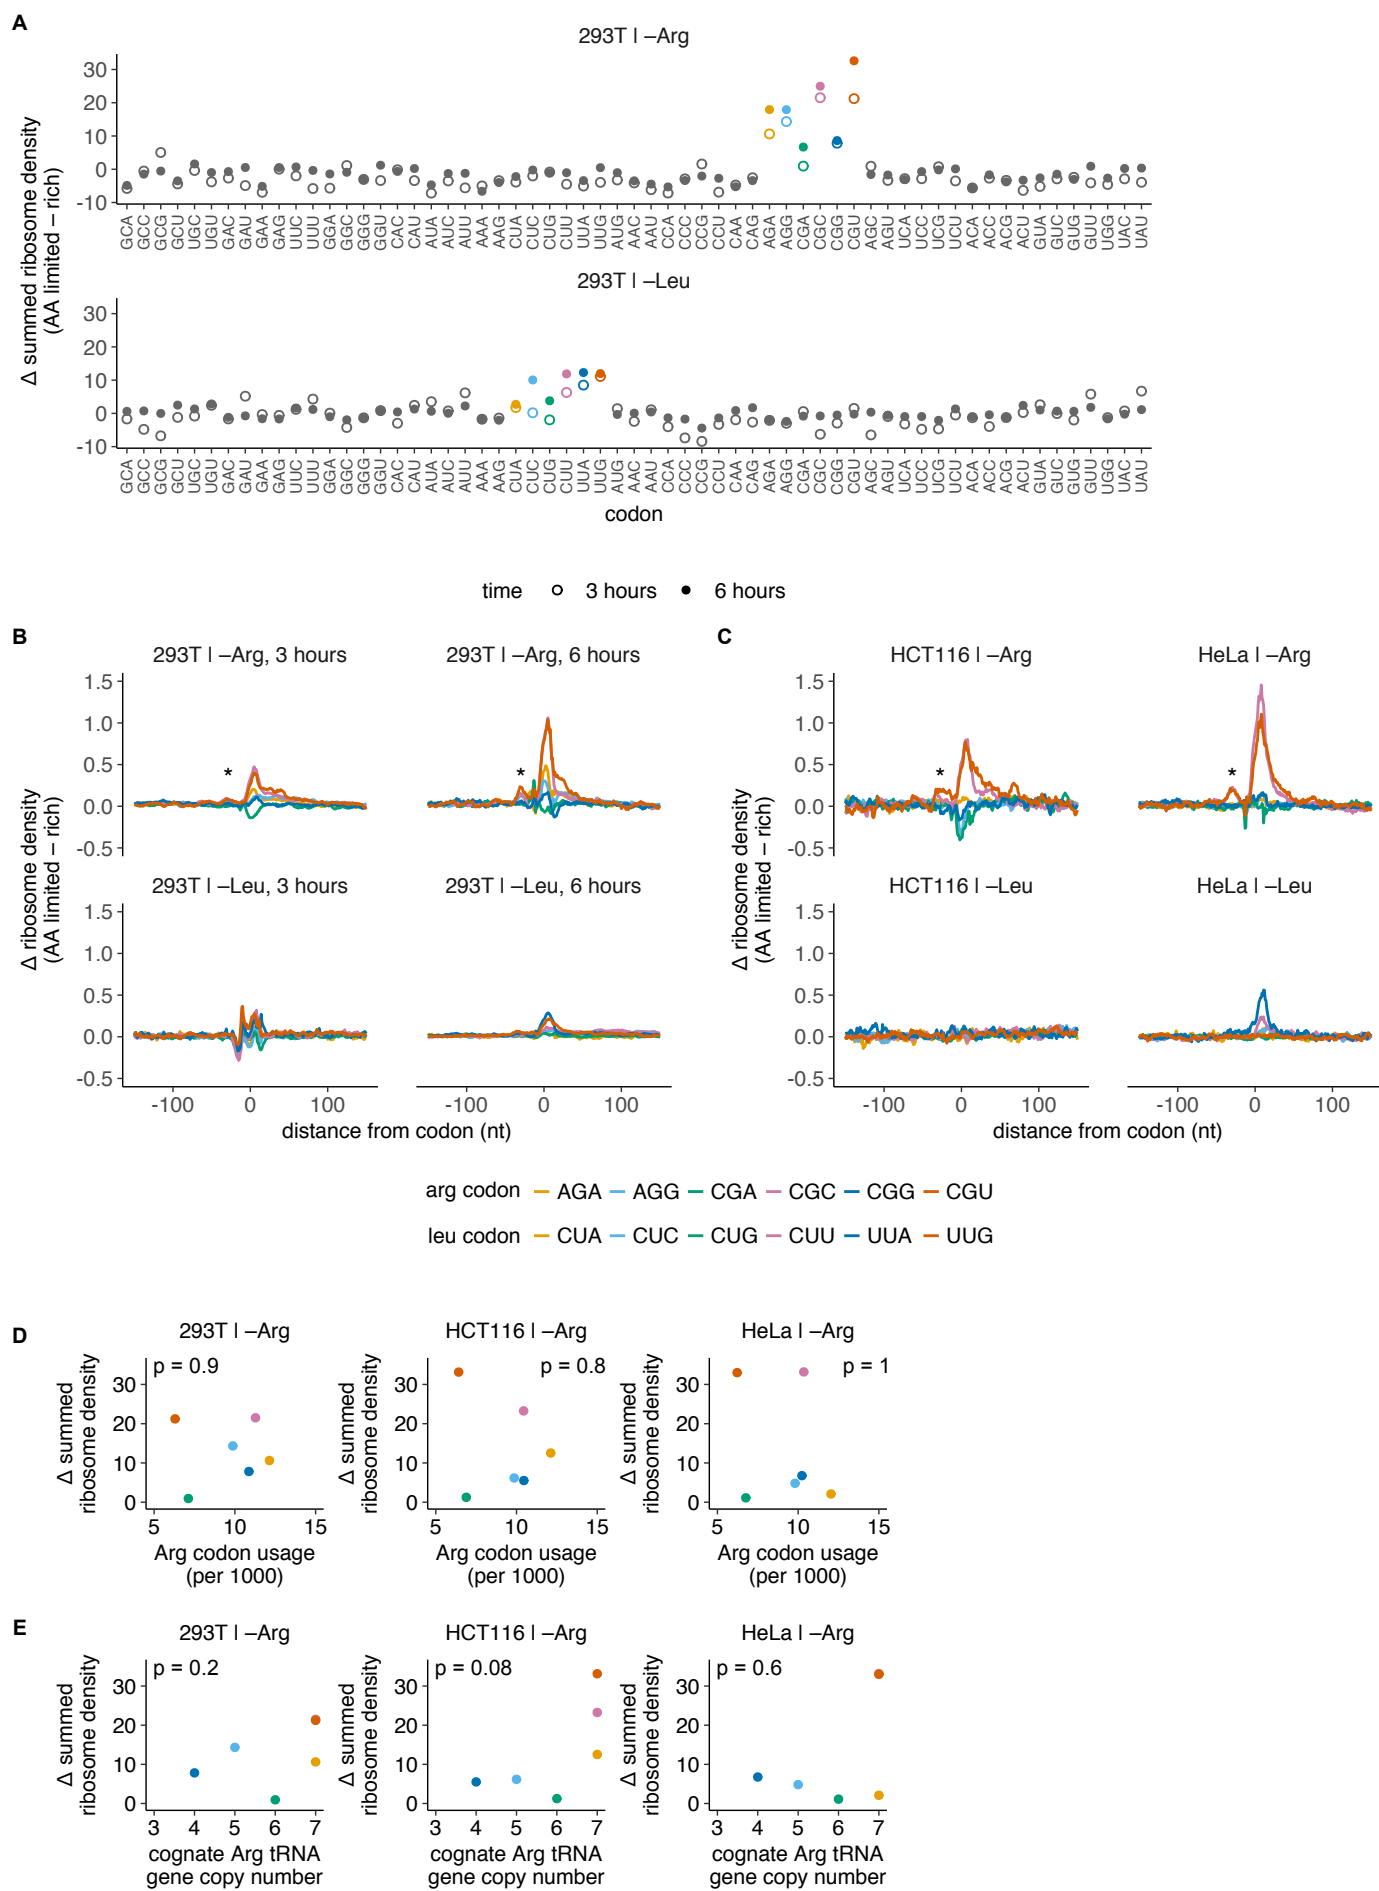

## FIGURE 2

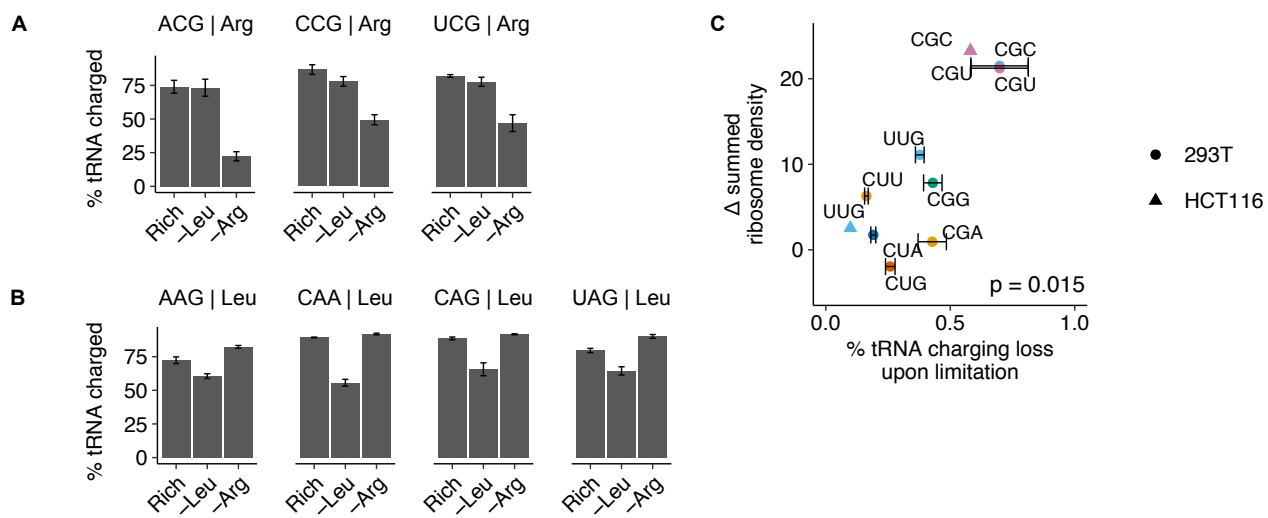

# FIGURE 3

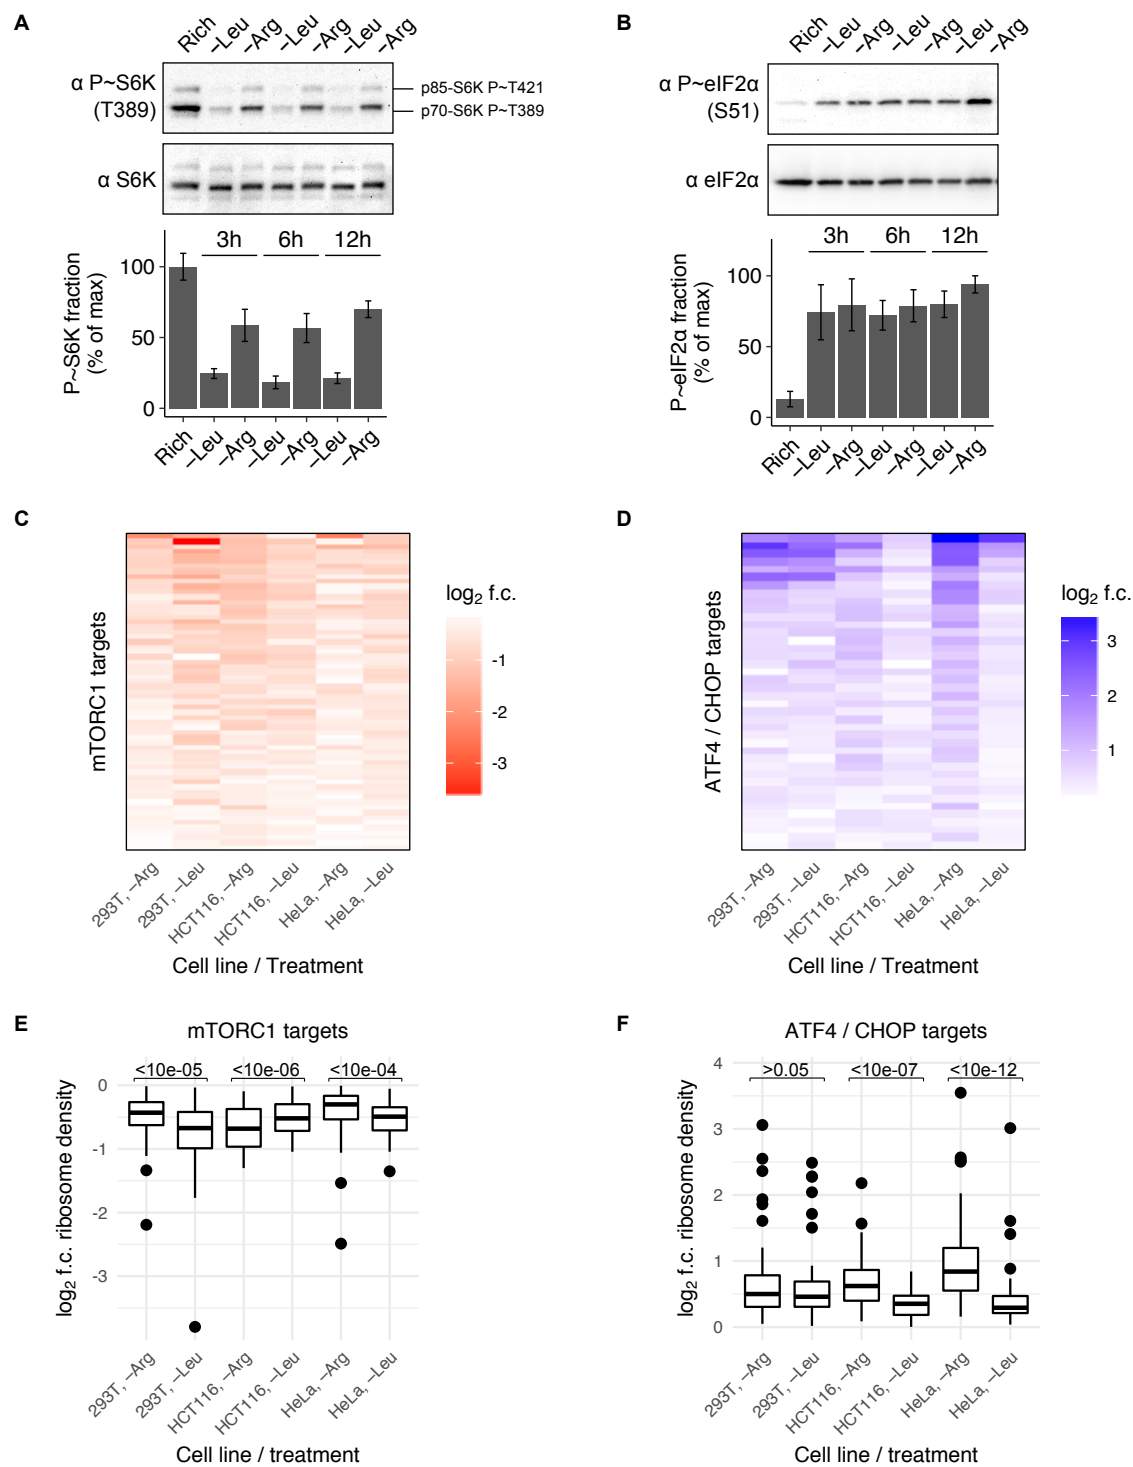

# FIGURE 4

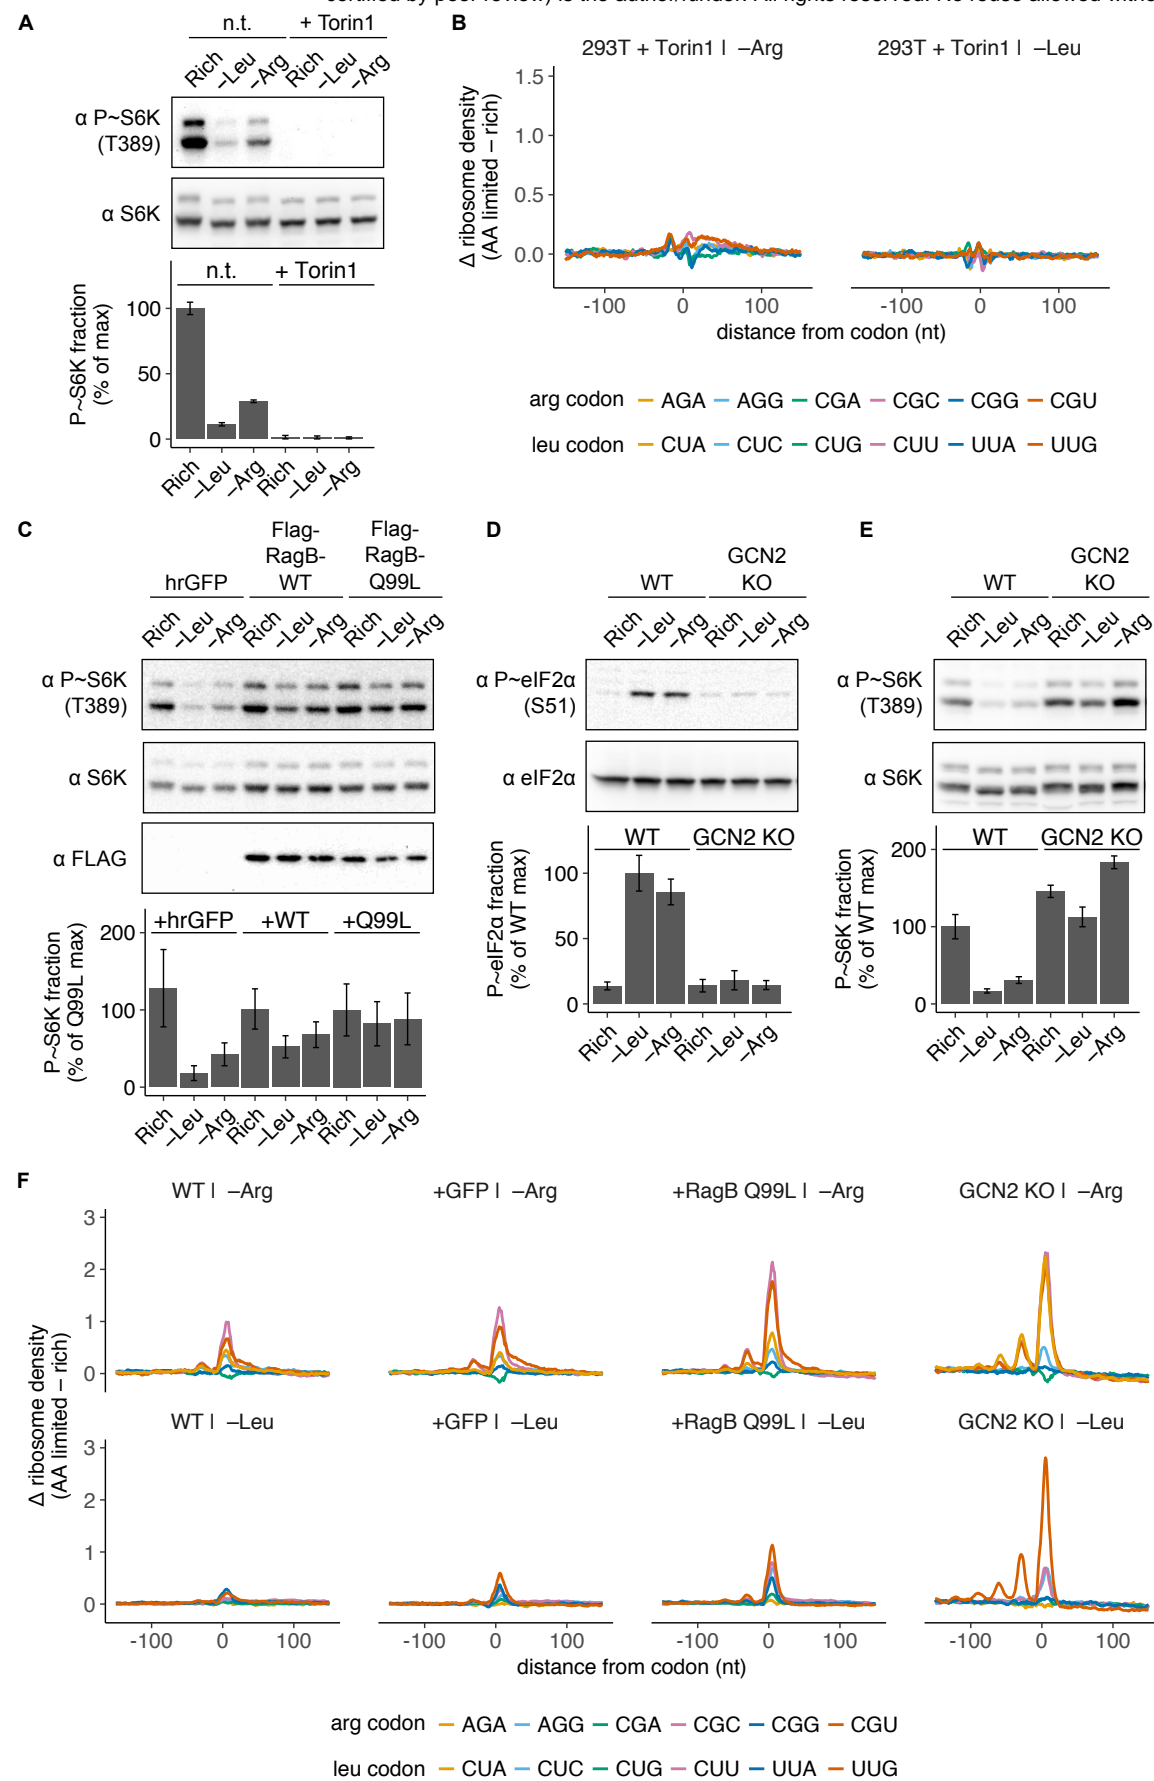

# FIGURE 5

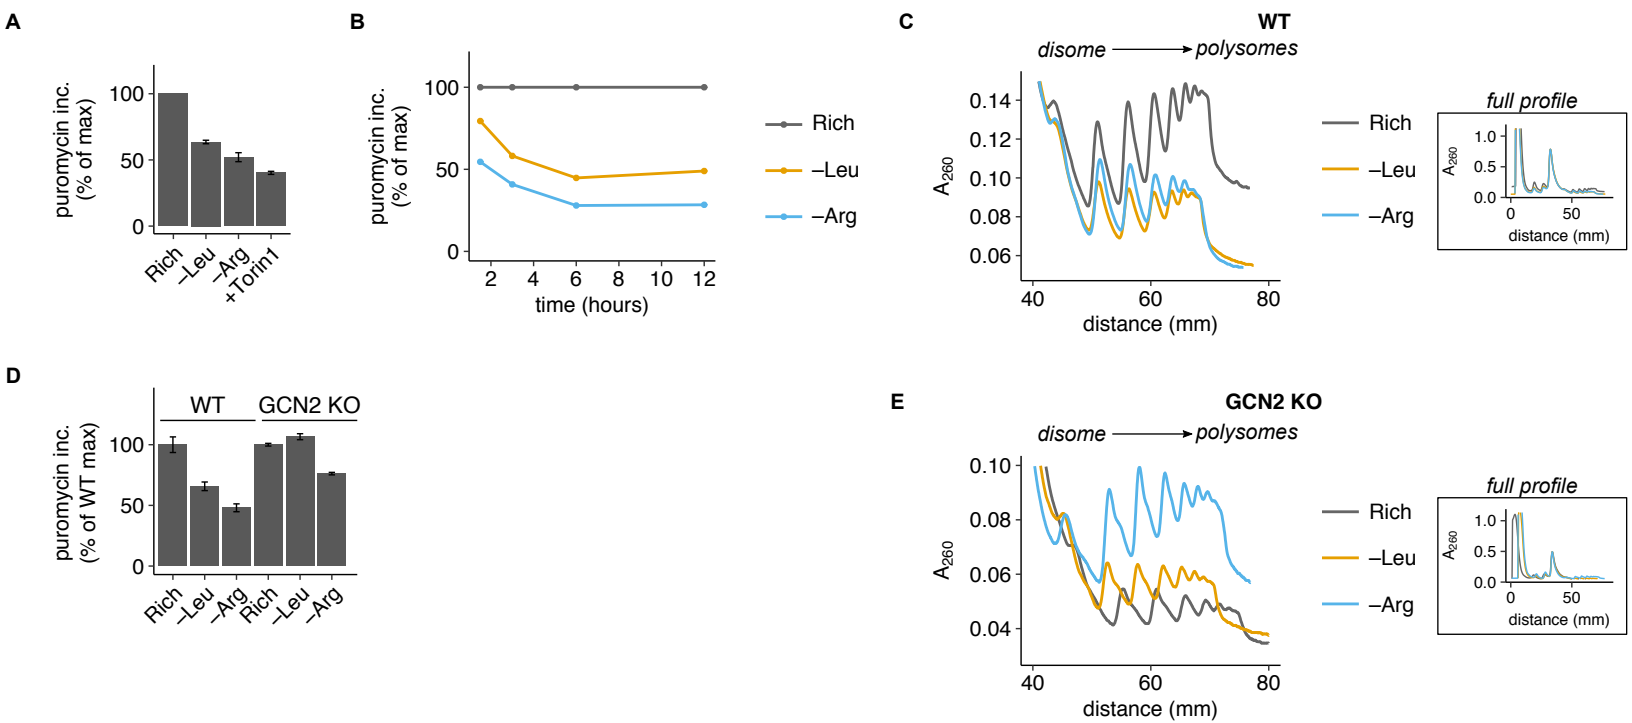

# FIGURE 6

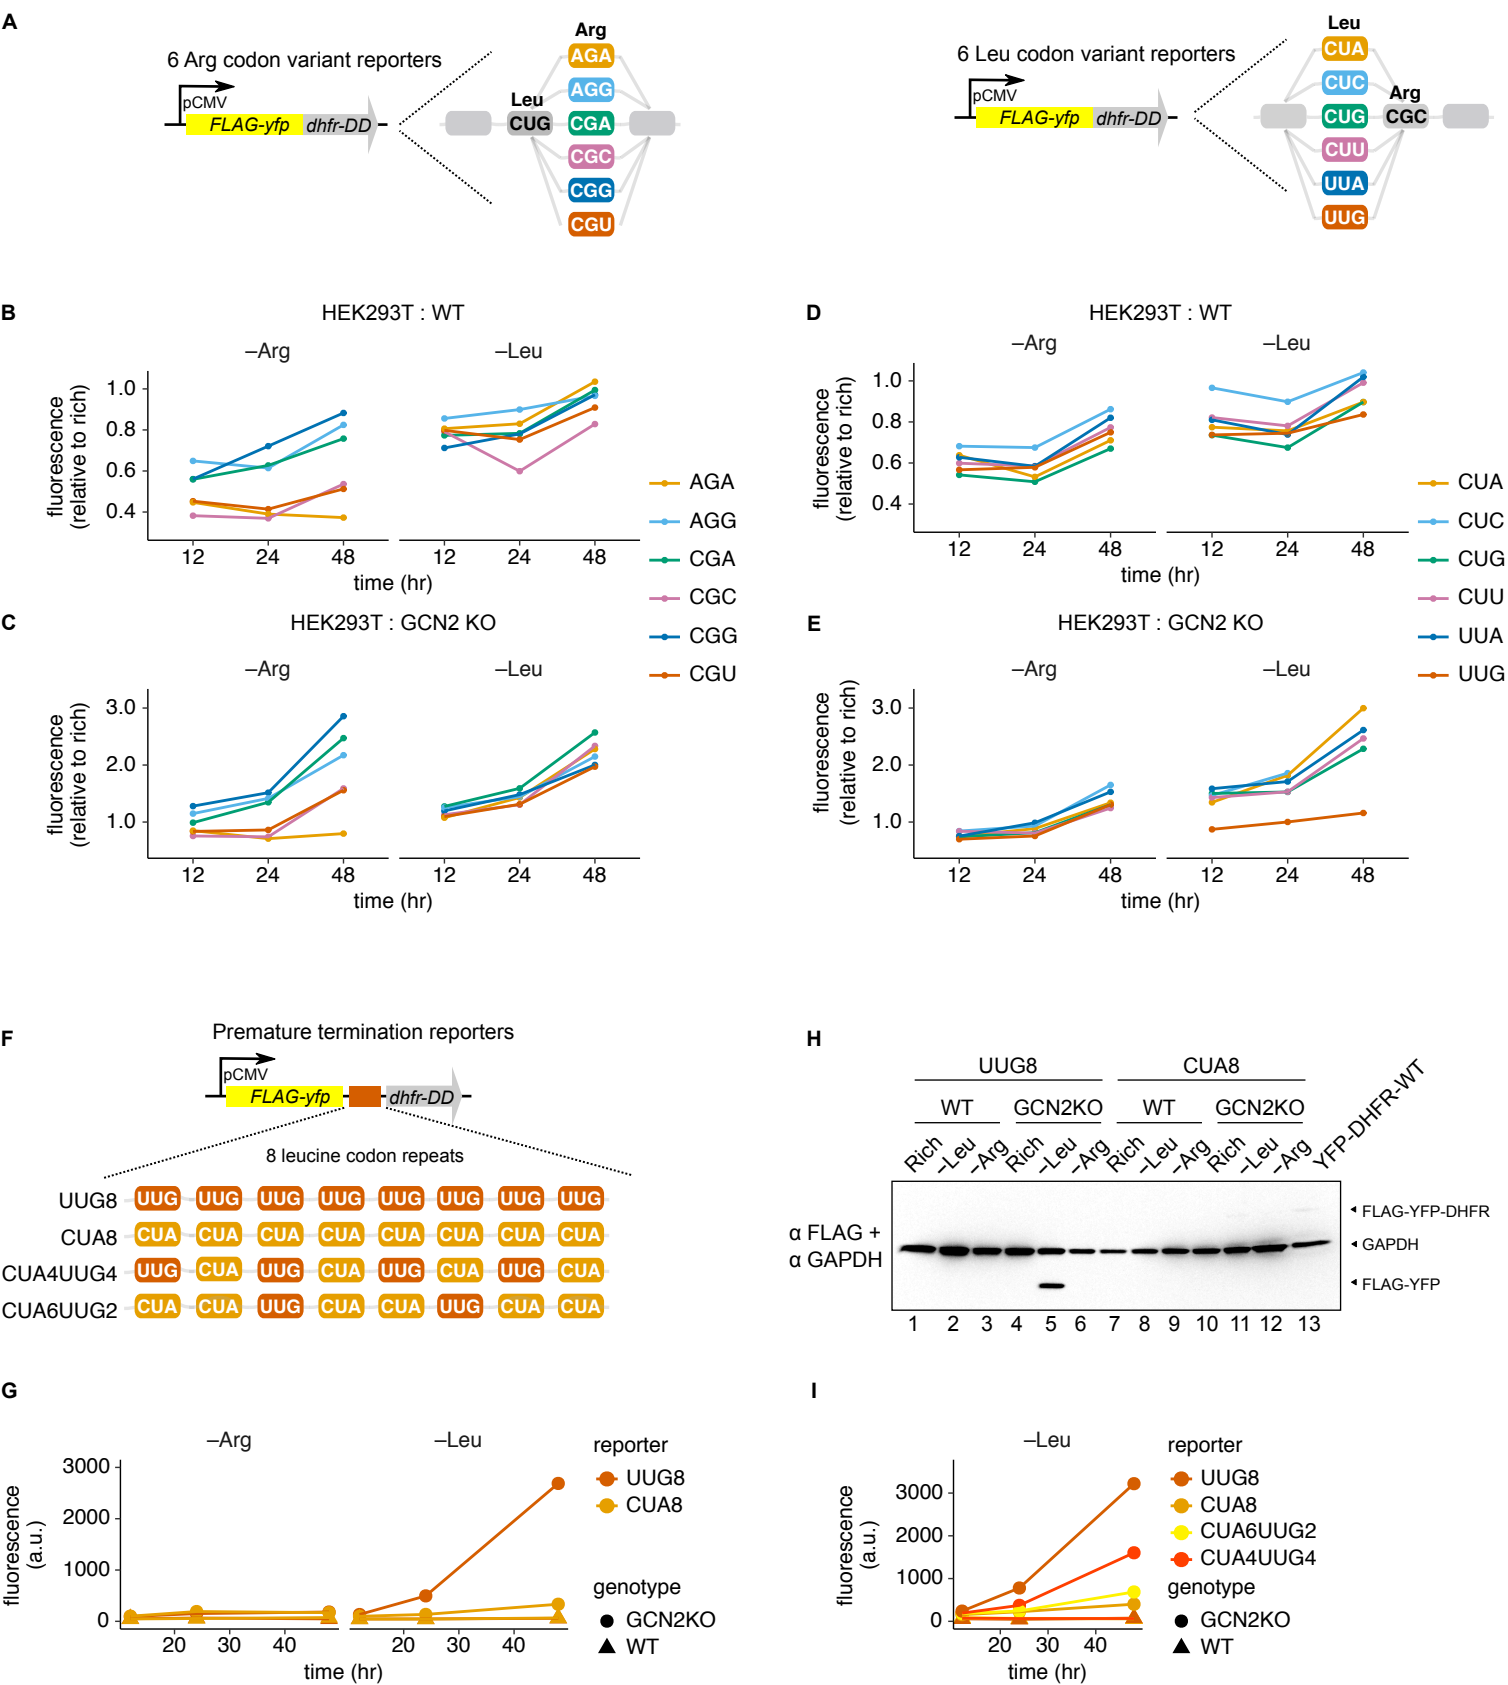



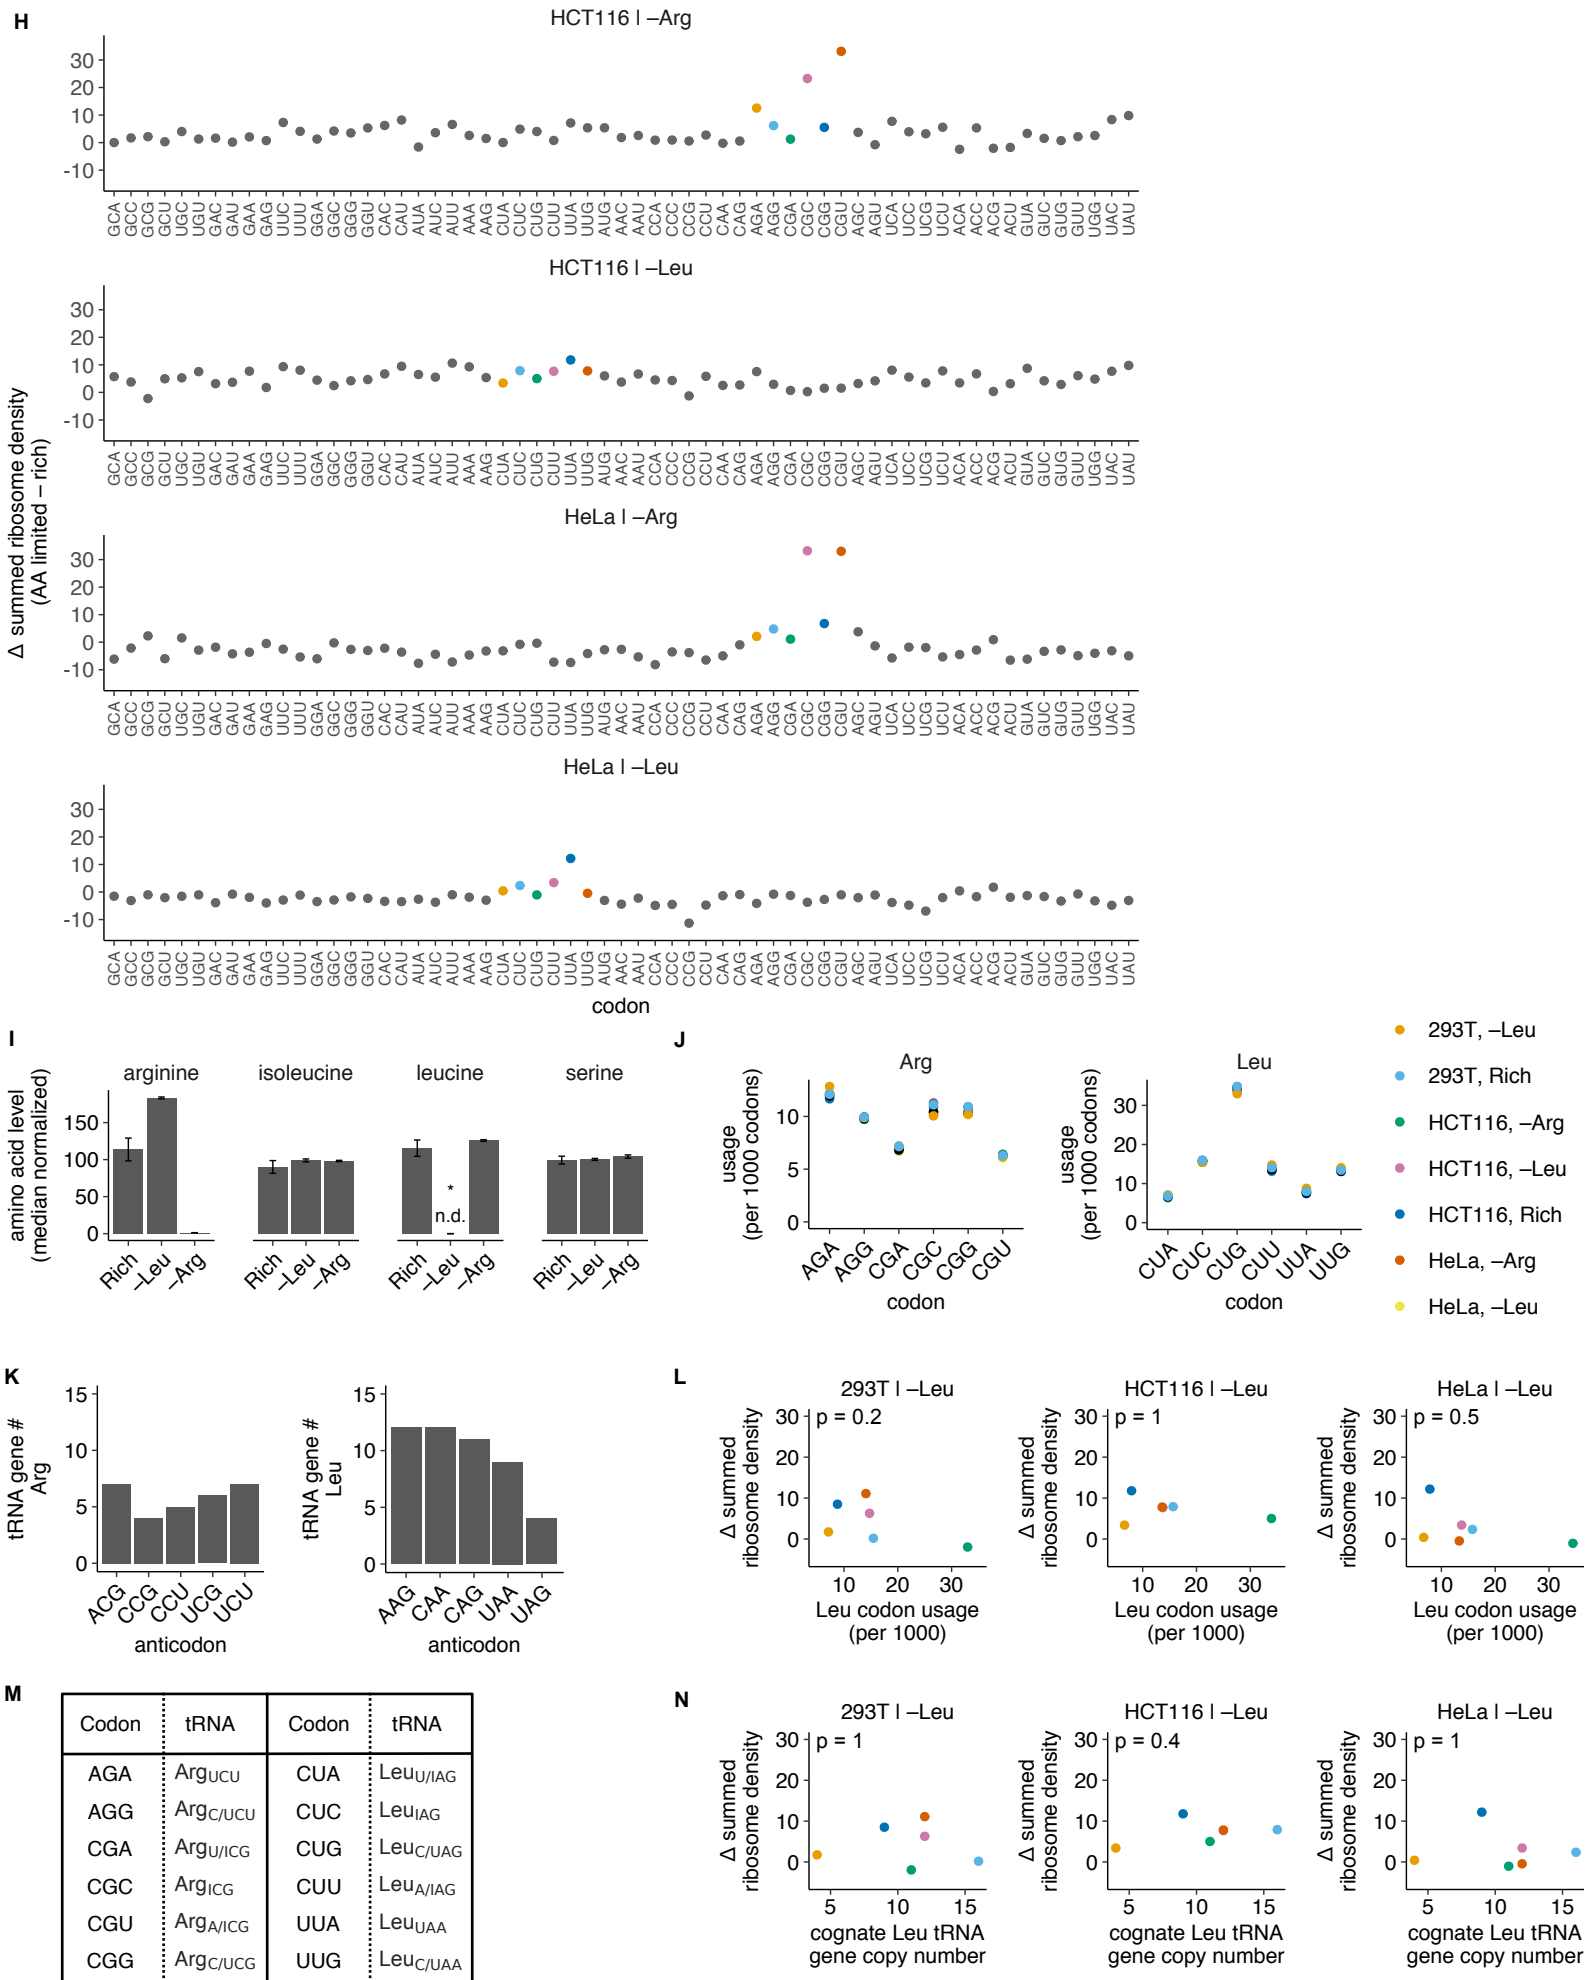



# SUPP. FIGURE 2

A

## HEK293T

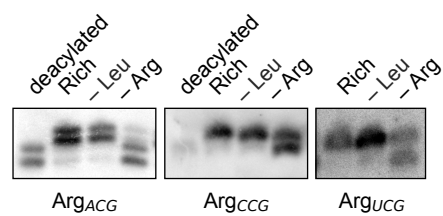

B

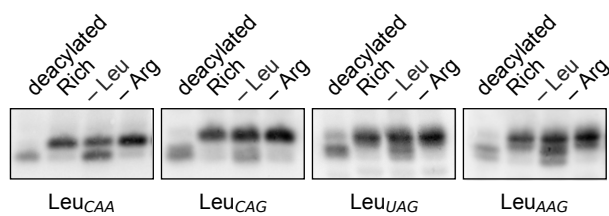

C

## HCT116

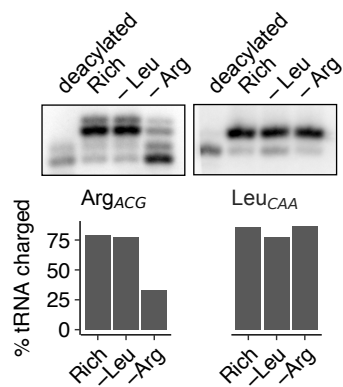

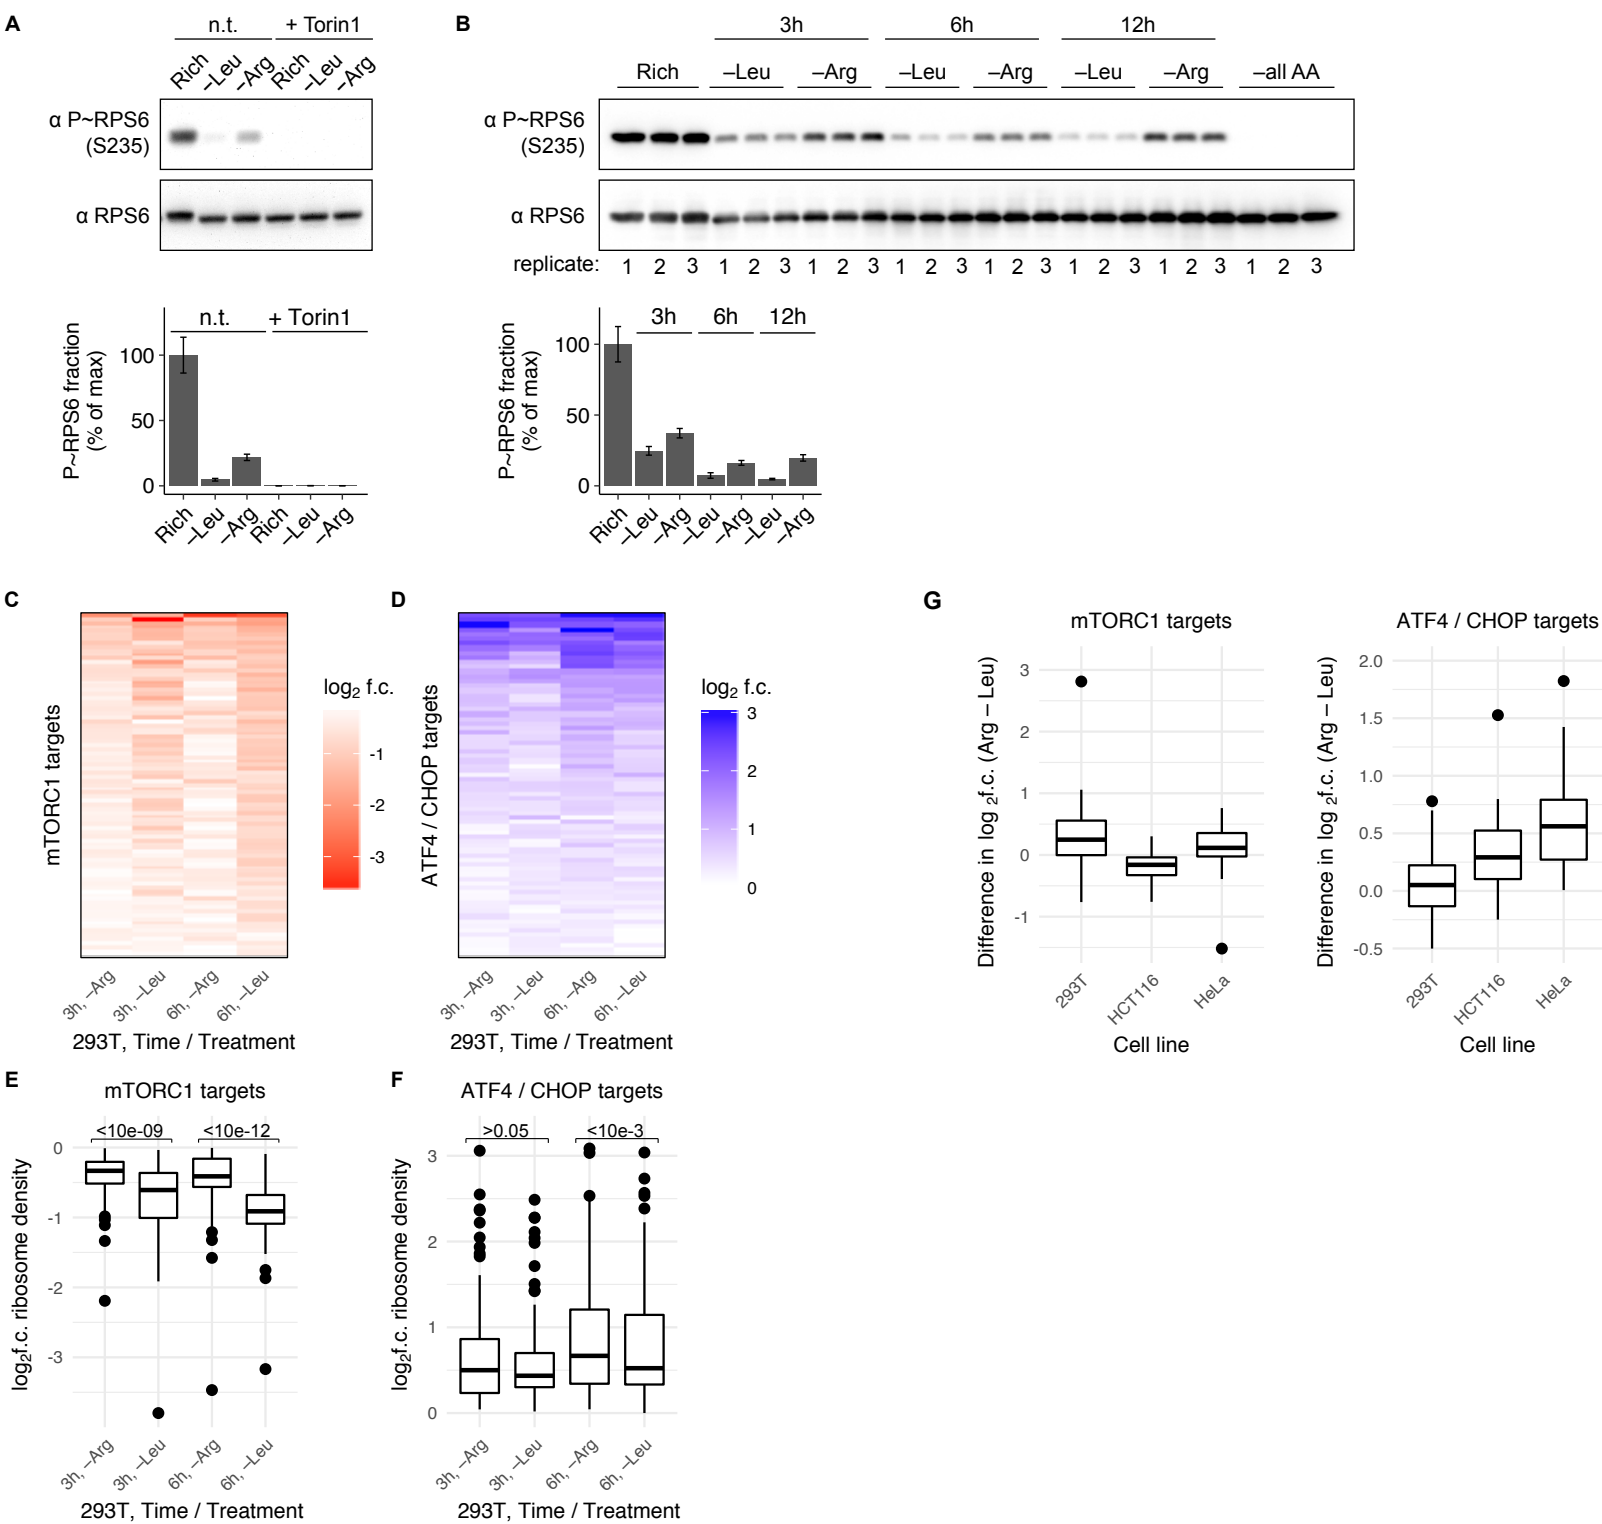

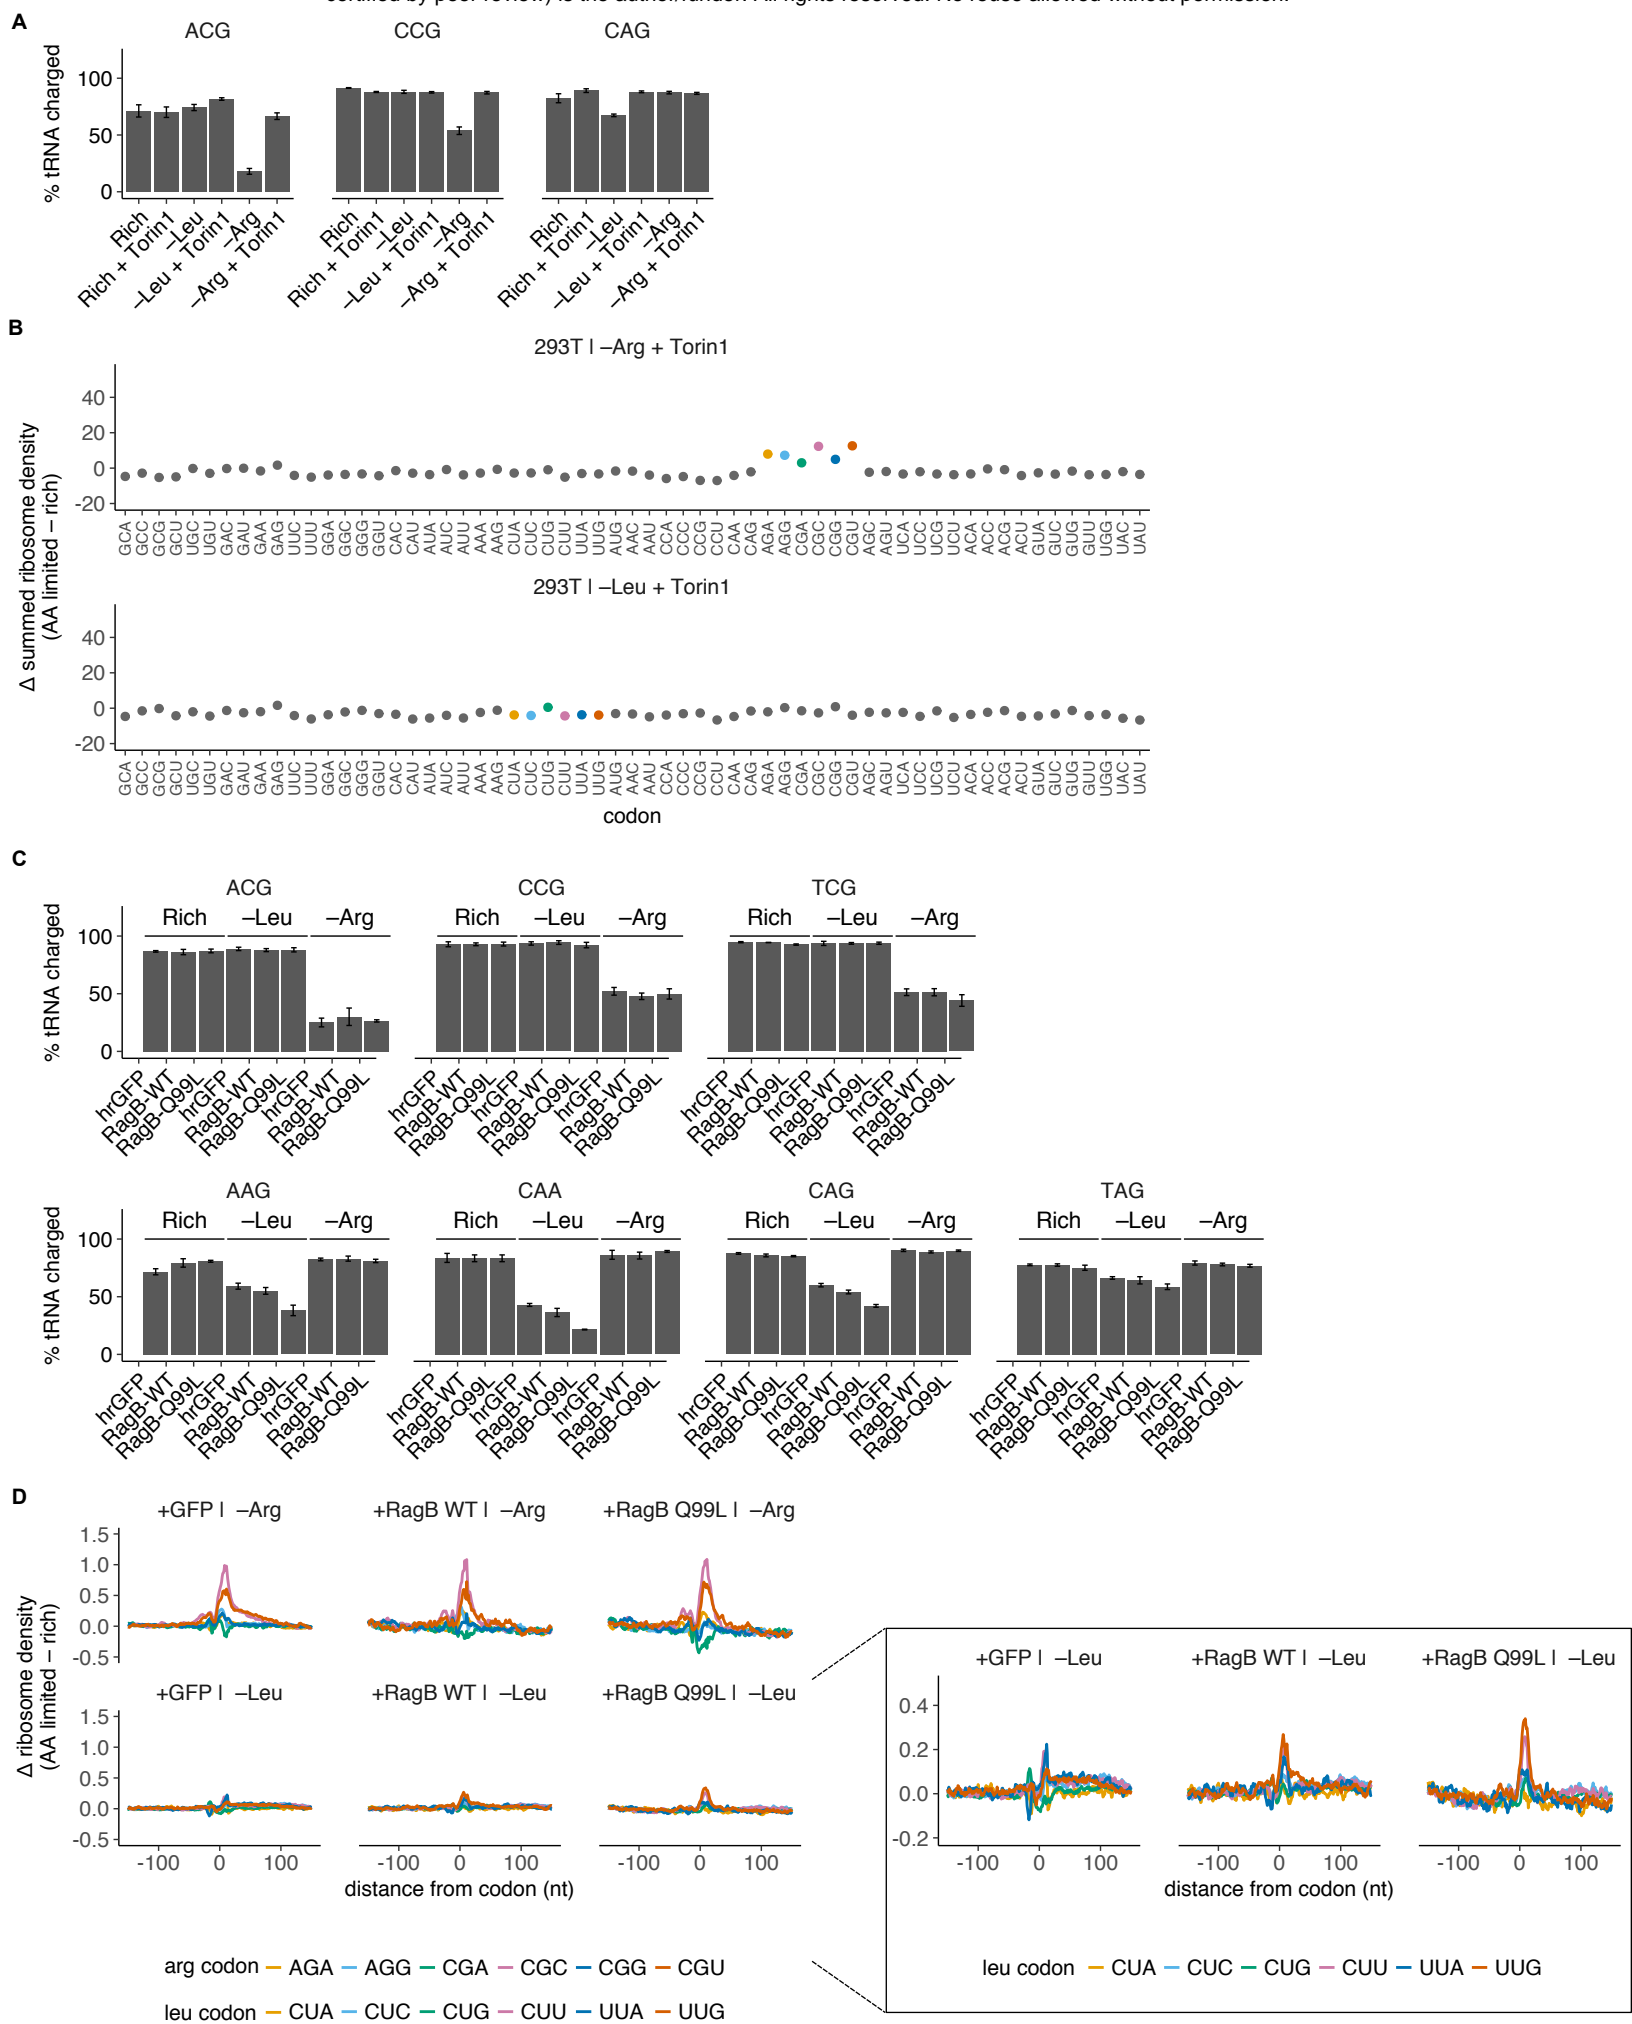

E

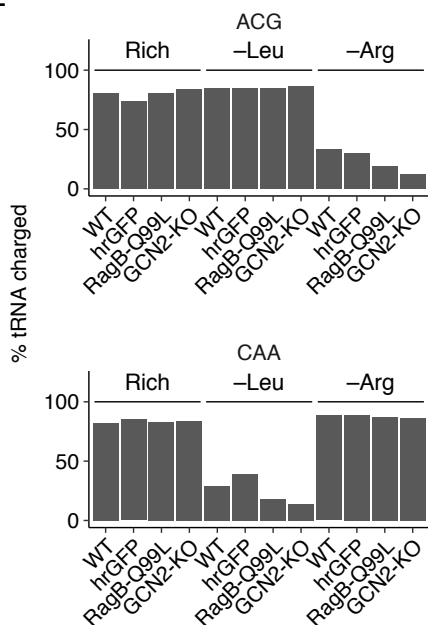

F

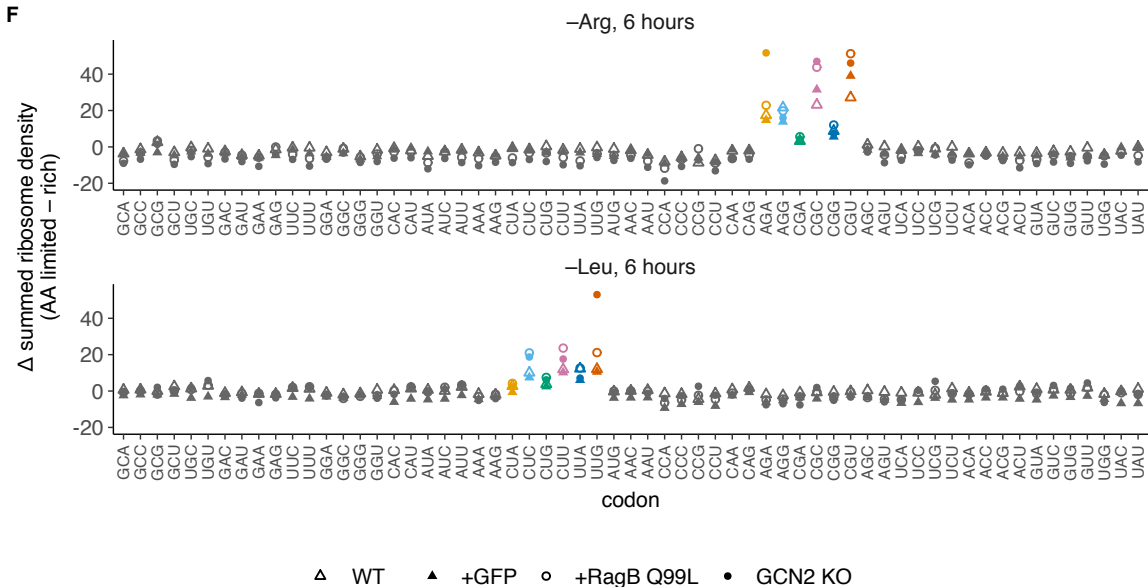

G

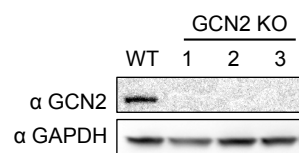

H

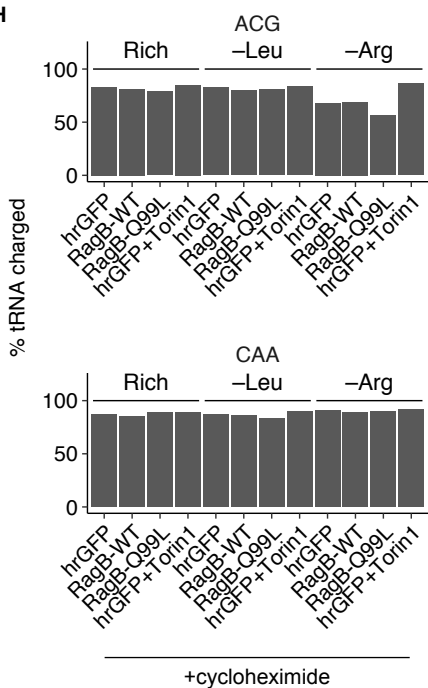



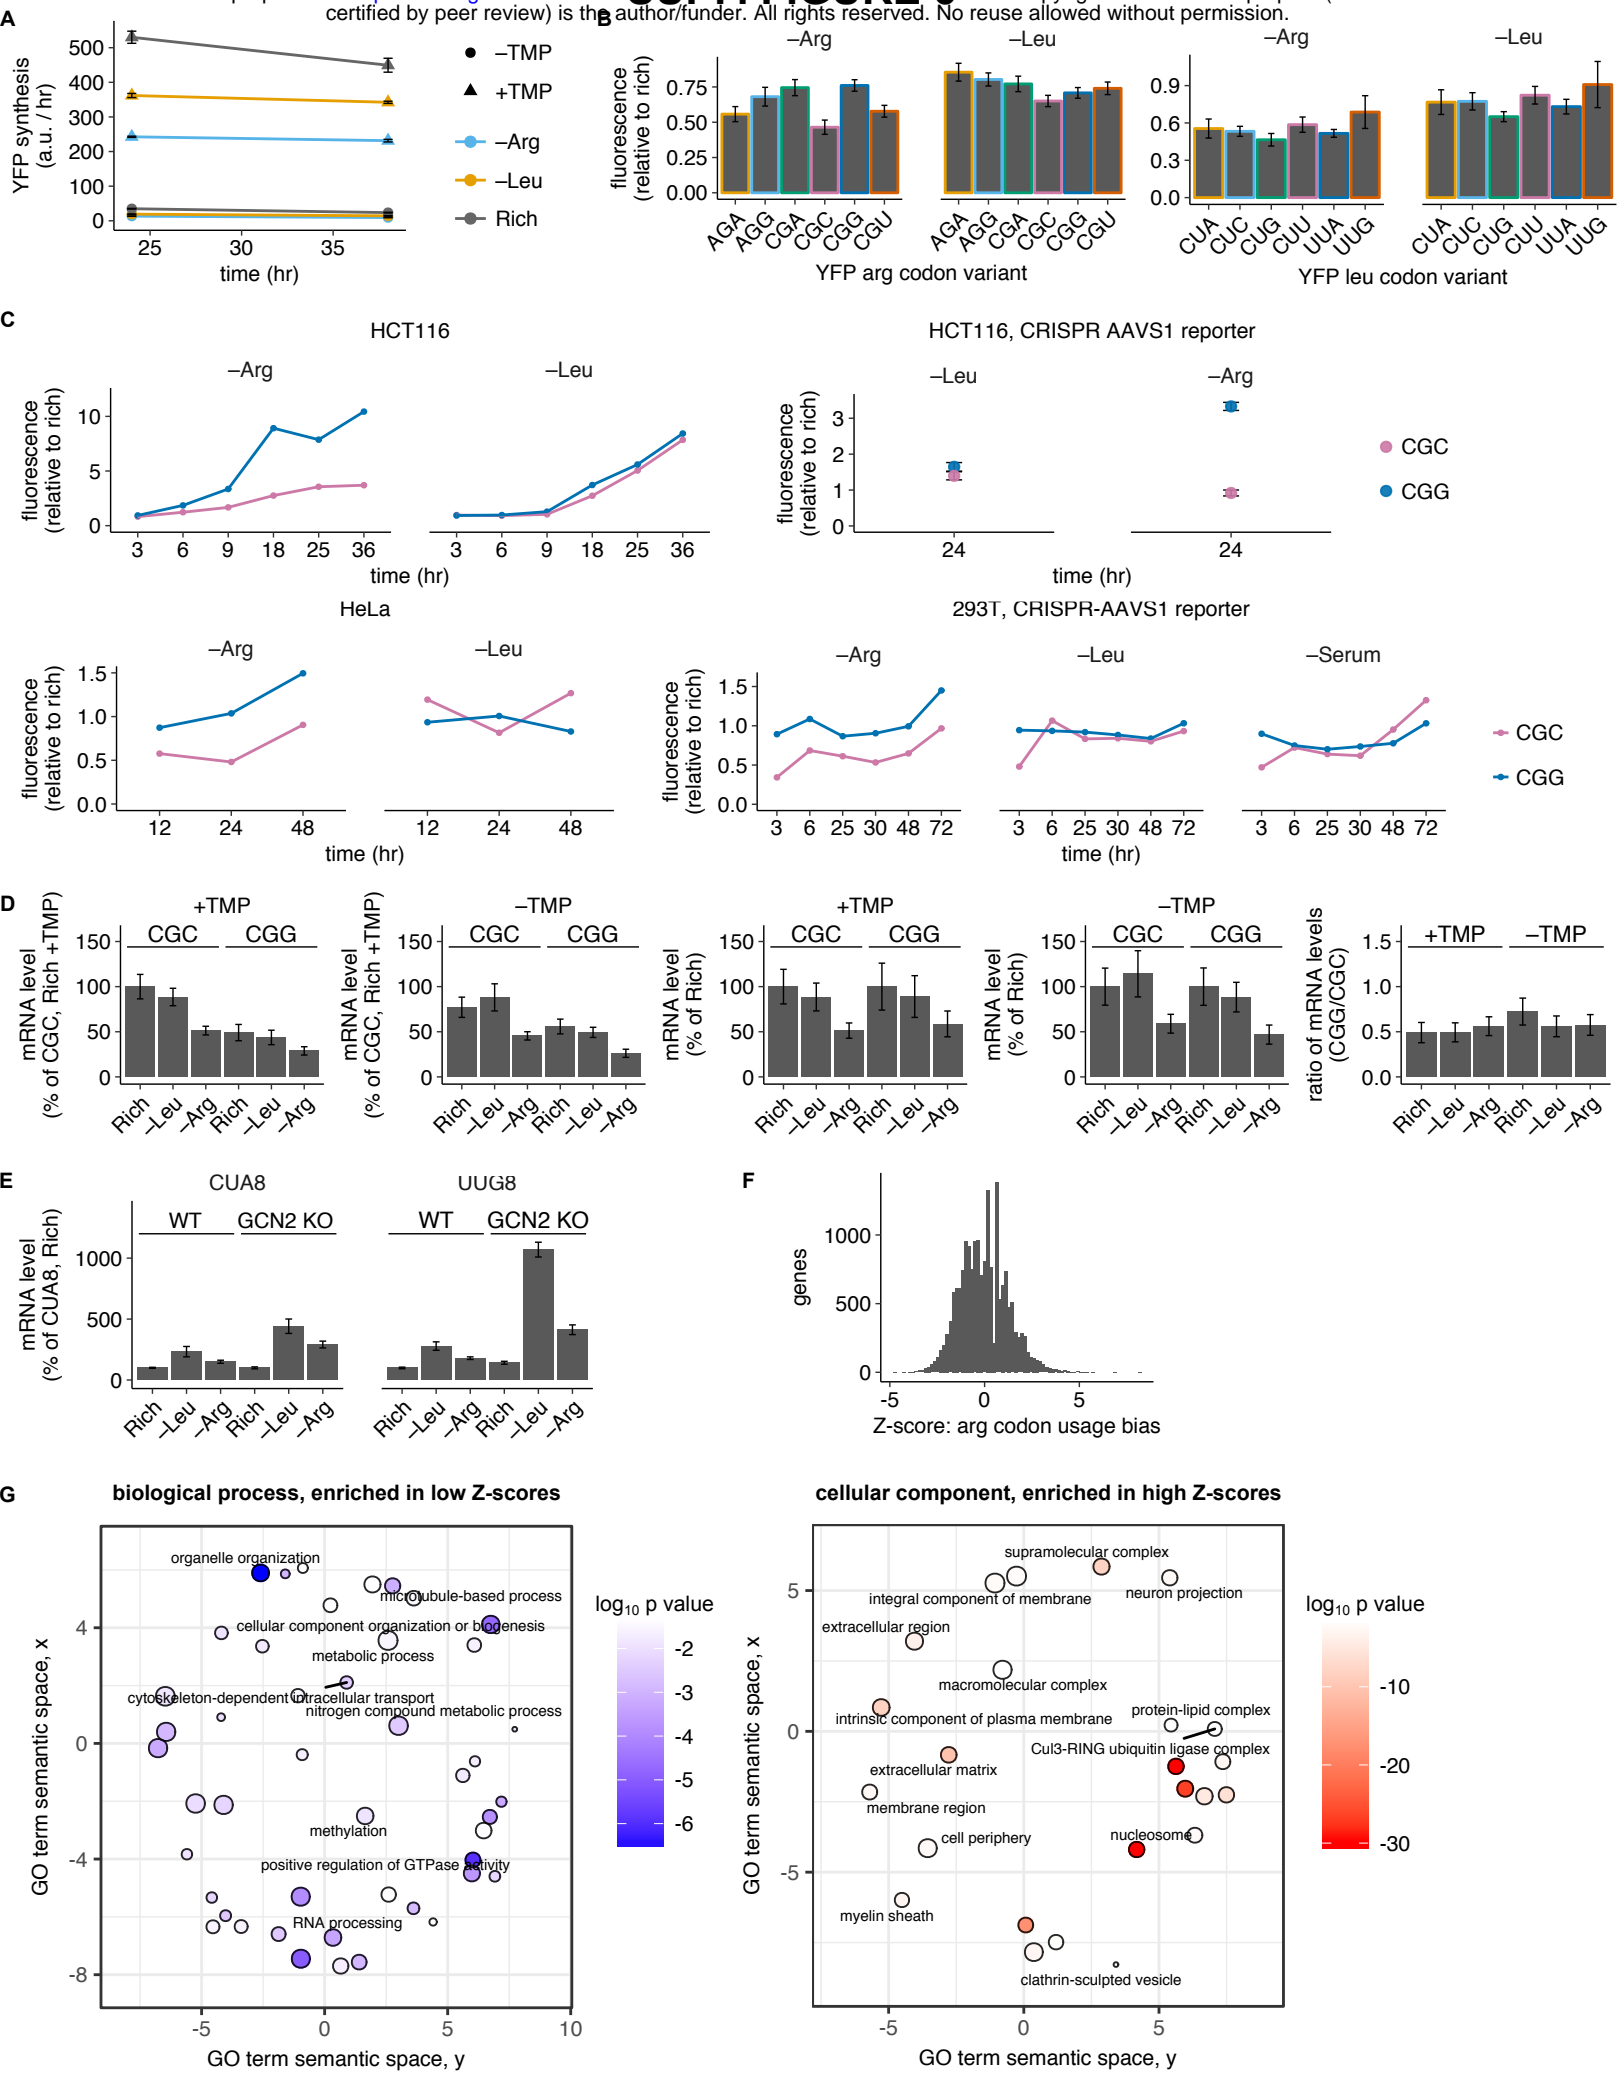

# SUPP. FIGURE 7

A

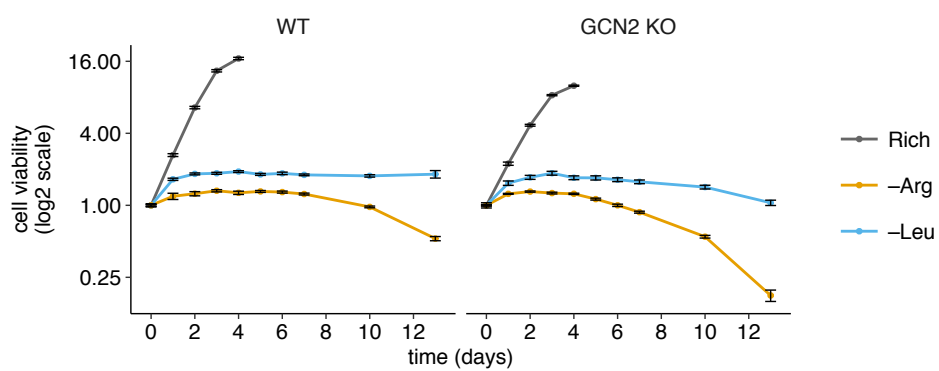

Source: https://www.biorxiv.org/content/10.1101/321448v1.full.pdf
